# Supplementary material for: 20世紀の東北アジアにおける人口移動と「華」( 移住先社会と中国のあいだで-近現代史における「華」を問う)
Source: MDPI journal article supplement (doi:10.3390/microorganisms12040738), 2011-02-25
Supplement: s1 [file s1]

**Table S3.** Basic information of 1329 pigeon NDV strains from GenBank database (accessed on February 6, 2024).

| No | GenBank    | Strain                                                                  | Year | Region    | Class    | Genotype | Sub-genotype |
|----|------------|-------------------------------------------------------------------------|------|-----------|----------|----------|--------------|
| 1  | AB070390.1 | Avian_orthoavulavirus_1_APMV1/pigeon/Japan/FK-1/84                      | 1984 | Japan     | Class II | VI       | VI.2.1.1.1   |
| 2  | AB070391.1 | Avian_orthoavulavirus_1_APMV1/pigeon/Japan/Toyama/84                    | 1984 | Japan     | Class II | VI       | VI.2.1.1.1   |
| 3  | AB070392.1 | Avian_orthoavulavirus_1_APMV1/pigeon/Japan/Ibaraki/84                   | 1984 | Japan     | Class II | VI       | VI.1         |
| 4  | AB070393.1 | Avian_orthoavulavirus_1_APMV1/pigeon/Japan/Nagano-8/84                  | 1984 | Japan     | Class II | VI       | VI.2.1.1.1   |
| 5  | AB070407.1 | Avian_orthoavulavirus_1_APMV1/pigeon/Japan/Tochigi/86                   | 1986 | Japan     | Class II | VI       | VI.1         |
| 6  | AB070409.1 | Avian_orthoavulavirus_1_APMV1/pigeon/Japan/Niigata/88                   | 1988 | Japan     | Class II | VI       | VI.2.1.1.1   |
| 7  | AB070412.1 | Avian_orthoavulavirus_1_APMV1/pigeon/Japan/Kushiro/91                   | 1991 | Japan     | Class II | VI       | VI.2.1.1.1   |
| 8  | AB070413.1 | Avian_orthoavulavirus_1_APMV1/pigeon/Japan/Tokachi/91                   | 1991 | Japan     | Class II | VI       | VI.2.1.1.1   |
| 9  | AB070416.1 | Avian_orthoavulavirus_1_APMV1/pigeon/Japan/Ehime/93                     | 1993 | Japan     | Class II | VI       | VI.2.1.1.1   |
| 10 | AB070417.1 | Avian_orthoavulavirus_1_APMV1/pigeon/Japan/Kumamoto/95                  | 1995 | Japan     | Class II | VI       | VI.2.1.1.1   |
| 11 | AB070419.1 | Avian_orthoavulavirus_1_APMV1/pigeon/Japan/Tochigi/95                   | 1995 | Japan     | Class II | VI       | VI.2.1.1.1   |
| 12 | AB070420.1 | Avian_orthoavulavirus_1_APMV1/pigeon/Japan/Utsunomiya/95                | 1995 | Japan     | Class II | VI       | VI.2.1.1.1   |
| 13 | AB070422.1 | Avian_orthoavulavirus_1_APMV1/pigeon/Japan/Shiga/96                     | 1996 | Japan     | Class II | VI       | VI.2.1.1.1   |
| 14 | AB070423.1 | Avian_orthoavulavirus_1_APMV1/pigeon/Japan/Fukushima/96                 | 1996 | Japan     | Class II | VI       | VI.2.1.1.1   |
| 15 | AB070426.1 | Avian_orthoavulavirus_1_APMV1/pigeon/Japan/Saitama/97                   | 1997 | Japan     | Class II | VI       | VI.2.1.1.1   |
| 16 | AB070434.1 | Avian_orthoavulavirus_1_APMV1/pigeon/Japan/Gunma/2000                   | 2000 | Japan     | Class II | VI       | VI.2.1.1.1   |
| 17 | AF204754.1 | Newcastle_disease_virus_isolate_APMV1/Pigeon/Kerala/India/NDV-KPG/_1998 | 1998 | India     | Class II | XXI      | XXI.2        |
| 18 | AF325434.1 | Pigeon_paramyxovirus-1                                                  | 2000 | Argentina | Class II | XXI      | XXI.2        |
| 19 | AF358785.1 | Newcastle_disease_virus_strain_Ch/98-1_                                 | 1998 | China     | Class II | VI       | VI.2.2.2     |
| 20 | AF452098.1 | Newcastle_disease_virus                                                 | 2001 | USA       | Class II | VI       | VI.2.1.1.1   |
| 21 | AF503647.1 | Newcastle_disease_virus_pigeon/Portugal/8893/98                         | 1998 | Portugal  | Class II | VI       | VI.2.1.1.2.2 |
| 22 | AF506762.1 | Newcastle_disease_virus_strain_98/247                                   | 1998 | Belgium   | Class II | VI       | VI.2.1.1.1   |

|    |            |                                                          |      |         |          |     |              |
|----|------------|----------------------------------------------------------|------|---------|----------|-----|--------------|
| 23 | AF506763.1 | Newcastle_disease_virus_strain_99/3                      | 1999 | Belgium | Class II | VI  | VI.2.1.1.1   |
| 24 | AF506764.1 | Newcastle_disease_virus_strain_98/316                    | 1998 | Belgium | Class II | VI  | VI.2.1.1.2.1 |
| 25 | AF506765.1 | Newcastle_disease_virus_strain_98/253                    | 1998 | Belgium | Class II | VI  | VI.2.1.1.2.1 |
| 26 | AF506766.1 | Newcastle_disease_virus_strain_98/317                    | 1998 | Belgium | Class II | VI  | VI.2.1.1.2.1 |
| 27 | AF506767.1 | Newcastle_disease_virus_strain_98/103                    | 1998 | Belgium | Class II | VI  | VI.2.1.1.2.1 |
| 28 | AF506768.1 | Newcastle_disease_virus_strain_98/169                    | 1998 | Belgium | Class II | VI  | VI.2.1.1.2.1 |
| 29 | AF510738.1 | Newcastle_disease_virus_isolate_2K7/Pigeon/Chennai/India | ?    | India   | Class II | II  | II           |
| 30 | AF520965.1 | Newcastle_disease_virus_isolate_2736/00                  | 2000 | Italy   | Class II | VI  | VI.2.1.1.1   |
| 31 | AF520966.1 | Newcastle_disease_virus_isolate_907/00                   | 2000 | Italy   | Class II | VI  | VI.1         |
| 32 | AF520967.1 | Newcastle_disease_virus_isolate_1166/00                  | 2000 | Italy   | Class II | VI  | VI.2.1.1.2.1 |
| 33 | AF520968.1 | Newcastle_disease_virus_isolate_1444/00                  | 2000 | Italy   | Class II | VI  | VI.1         |
| 34 | AF520969.1 | Newcastle_disease_virus_isolate_1811/00                  | 2000 | Italy   | Class II | VI  | VI.1         |
| 35 | AF520970.1 | Newcastle_disease_virus_isolate_4400/00                  | 2000 | Italy   | Class II | VI  | VI.1         |
| 36 | AF520971.1 | Newcastle_disease_virus_isolate_177/01                   | 2001 | Italy   | Class II | VI  | VI.2.1.1.1   |
| 37 | AF520972.1 | Newcastle_disease_virus_isolate_7007/01                  | 2001 | Italy   | Class II | VI  | VI.2.1.1.2.1 |
| 38 | AJ306304.1 | Newcastle_disease_virus_strain_99299                     | 1999 | France  | Class II | VI  | VI.2.1.1.2.1 |
| 39 | AJ306305.1 | Newcastle_disease_virus_strain_99106                     | 1999 | France  | Class II | VI  | VI.2.1.1.2.1 |
| 40 | AJ415880.1 | Pigeon_paramyxovirus-1_strain_99143                      | 1999 | France  | Class II | II  | II           |
| 41 | AY008324.1 | Newcastle_disease_virus_isolate_pigeon/1307/U.S./75      | 1975 | USA     | Class II | XIX | XIX          |
| 42 | AY008325.1 | Newcastle_disease_virus_isolate_pigeon/21042/U.S./98     | 1998 | USA     | Class II | XXI | XXI.2        |
| 43 | AY008326.1 | Newcastle_disease_virus_isolate_pigeon/3981/U.S.(MD)/84  | 1984 | USA     | Class II | XXI | XXI.1.1      |
| 44 | AY008327.1 | Newcastle_disease_virus_isolate_pigeon/44407/U.S./84     | 1984 | USA     | Class II | XIX | XIX          |
| 45 | AY008328.1 | Newcastle_disease_virus_isolate_pigeon/5658/U.S./75      | 1975 | USA     | Class II | V   | V.3          |
| 46 | AY008329.1 | Newcastle_disease_virus_isolate_pigeon/NY/U.S./84        | 1984 | USA     | Class II | VI  | VI.1         |
| 47 | AY008330.1 | Newcastle_disease_virus_isolate_pigeon/17498/U.S./98     | 1998 | USA     | Class II | VI  | VI.2.2.1     |
| 48 | AY130862.1 | Newcastle_disease_virus_dove/U.S./9248-10/98             | 1998 | USA     | Class II | VII | VII.2        |

|    |            |                                             |      |                   |          |    |            |
|----|------------|---------------------------------------------|------|-------------------|----------|----|------------|
| 49 | AY135742.1 | Newcastle_disease_virus_isolate_BBGPI95039  | 1995 | Bulgaria          | Class II | XX | XX         |
| 50 | AY135747.1 | Newcastle_disease_virus_isolate_BITPI87079  | 1987 | Italy             | Class II | V  | V.3        |
| 51 | AY135749.1 | Newcastle_disease_virus_isolate_PDEPI94102  | 1994 | Germany           | Class II | VI | VI.2.2.1   |
| 52 | AY150092.1 | Newcastle_disease_virus_strain_Iraq78       | 1978 | Iraq              | Class II | VI | VI.1       |
| 53 | AY150093.1 | Newcastle_disease_virus_strain_IT-227/82    | 1982 | Italy             | Class II | VI | VI.2.1.1.1 |
| 54 | AY150094.1 | Newcastle_disease_virus_strain_MT-217/82    | 1982 | European          | Class II | VI | VI.2.1.1.1 |
| 55 | AY150095.1 | Newcastle_disease_virus_strain_DE-209/83    | 1983 | European          | Class II | VI | VI.1       |
| 56 | AY150096.1 | Newcastle_disease_virus_strain_DE-302/83    | 1983 | European          | Class II | VI | VI.1       |
| 57 | AY150097.1 | Newcastle_disease_virus_strain_DK-279/83    | 1983 | European          | Class II | VI | VI.1       |
| 58 | AY150098.1 | Newcastle_disease_virus_strain_HU-58/83     | 1983 | European          | Class II | VI | VI.1       |
| 59 | AY150099.1 | Newcastle_disease_virus_strain_HU-61/83     | 1983 | North<br>American | Class II | VI | VI.2.2.1   |
| 60 | AY150100.1 | Newcastle_disease_virus_strain_SE-2/83      | 1983 | European          | Class II | VI | VI.1       |
| 61 | AY150102.1 | Newcastle_disease_virus_strain_HR-267/84    | 1984 | European          | Class II | VI | VI.1       |
| 62 | AY150103.1 | Newcastle_disease_virus_strain_HU-238/84    | 1984 | North<br>American | Class II | VI | VI.2.2.1   |
| 63 | AY150105.1 | Newcastle_disease_virus_strain_NO-1/85      | 1985 | European          | Class II | VI | VI.1       |
| 64 | AY150107.1 | Newcastle_disease_virus_strain_HU-342/86    | 1986 | European          | Class II | VI | VI.2.2.2   |
| 65 | AY150108.1 | Newcastle_disease_virus_strain_DE-33(MU)/87 | 1987 | European          | Class II | VI | VI.1       |
| 66 | AY150109.1 | Newcastle_disease_virus_strain_DE-35(MU)/87 | 1987 | European          | Class II | VI | VI.2.1.1.1 |
| 67 | AY150110.1 | Newcastle_disease_virus_strain_DE-47/87     | 1987 | North<br>American | Class II | VI | VI.2.2.1   |
| 68 | AY150111.1 | Newcastle_disease_virus_strain_EG-3/87      | 1987 | European          | Class II | VI | VI.2.1.1.1 |
| 69 | AY150112.1 | Newcastle_disease_virus_strain_EG-6/87      | 1987 | European          | Class II | VI | VI.2.1.1.1 |
| 70 | AY150113.1 | Newcastle_disease_virus_strain_HU-417/87    | 1987 | North<br>American | Class II | VI | VI.2.2.1   |

|    |            |                                          |      |                   |          |    |              |
|----|------------|------------------------------------------|------|-------------------|----------|----|--------------|
| 71 | AY150114.1 | Newcastle_disease_virus_strain_HU-491/87 | 1987 | European          | Class II | VI | VI.1         |
| 72 | AY150115.1 | Newcastle_disease_virus_strain_IT-125/87 | 1987 | European          | Class II | VI | VI.2.1.1.2.1 |
| 73 | AY150116.1 | Newcastle_disease_virus_strain_US-17/87  | 1987 | North<br>American | Class II | VI | VI.2.2.1     |
| 74 | AY150117.1 | Newcastle_disease_virus_strain_CA-24/88  | 1988 | North<br>American | Class II | VI | VI.2.2.1     |
| 75 | AY150118.1 | Newcastle_disease_virus_strain_HU-541/88 | 1988 | European          | Class II | VI | VI.1         |
| 76 | AY150119.1 | Newcastle_disease_virus_strain_CA-28/89  | 1989 | North<br>American | Class II | VI | VI.2.2.1     |
| 77 | AY150120.1 | Newcastle_disease_virus_strain_HU-655/89 | 1989 | European          | Class II | VI | VI.1         |
| 78 | AY150121.1 | Newcastle_disease_virus_strain_IT-132/89 | 1989 | European          | Class II | VI | VI.1         |
| 79 | AY150122.1 | Newcastle_disease_virus_strain_CA-41/90  | 1990 | North<br>American | Class II | VI | VI.2.2.1     |
| 80 | AY150123.1 | Newcastle_disease_virus_strain_DE-72/90  | 1990 | European          | Class II | VI | VI.2.1.1.1   |
| 81 | AY150124.1 | Newcastle_disease_virus_strain_DE-76/90  | 1990 | North<br>American | Class II | VI | VI.2.2.1     |
| 82 | AY150125.1 | Newcastle_disease_virus_strain_IT-137/90 | 1990 | European          | Class II | VI | VI.1         |
| 83 | AY150126.1 | Newcastle_disease_virus_strain_SE-3/90   | 1990 | North<br>American | Class II | VI | VI.2.2.1     |
| 84 | AY150127.1 | Newcastle_disease_virus_strain_CA-48/91  | 1991 | North<br>American | Class II | VI | VI.2.2.1     |
| 85 | AY150128.1 | Newcastle_disease_virus_strain_CA-56/92  | 1992 | North<br>American | Class II | VI | VI.2.2.1     |
| 86 | AY150129.1 | Newcastle_disease_virus_strain_DE-48/92  | 1992 | European          | Class II | VI | VI.2.1.1.1   |
| 87 | AY150131.1 | Newcastle_disease_virus_strain_DE-92/92  | 1992 | European          | Class II | VI | VI.2.1.1.2.1 |
| 88 | AY150132.1 | Newcastle_disease_virus_strain_ES-3/92   | 1992 | European          | Class II | VI | VI.2.1.1.1   |

|     |            |                                           |      |                   |          |     |              |
|-----|------------|-------------------------------------------|------|-------------------|----------|-----|--------------|
| 89  | AY150133.1 | Newcastle_disease_virus_strain_DE-51/93   | 1993 | European          | Class II | VI  | VI.2.1.1.1   |
| 90  | AY150134.1 | Newcastle_disease_virus_strain_DE-60/93   | 1993 | European          | Class II | VI  | VI.2.1.1.1   |
| 91  | AY150136.1 | Newcastle_disease_virus_strain_DE-65/93   | 1993 | North<br>American | Class II | VI  | VI.2.2.1     |
| 92  | AY150137.1 | Newcastle_disease_virus_strain_DE-97/93   | 1993 | European          | Class II | VI  | VI.2.1.1.2.1 |
| 93  | AY150138.1 | Newcastle_disease_virus_strain_DK-12/93   | 1993 | North<br>American | Class II | VI  | VI.2.2.1     |
| 94  | AY150139.1 | Newcastle_disease_virus_strain_DE-54/94   | 1994 | European          | Class II | VI  | VI.2.1.1.1   |
| 95  | AY150140.1 | Newcastle_disease_virus_strain_DE-55/94   | 1994 | European          | Class II | VI  | VI.2.1.1.1   |
| 96  | AY150142.1 | Newcastle_disease_virus_strain_IT-146/94  | 1994 | European          | Class II | VI  | VI.1         |
| 97  | AY150143.1 | Newcastle_disease_virus_strain_DE-57/95   | 1995 | European          | Class II | VI  | VI.2.1.1.1   |
| 98  | AY150144.1 | Newcastle_disease_virus_strain_HR-65/95   | 1995 | European          | Class II | XXI | XXI.1.1      |
| 99  | AY150145.1 | Newcastle_disease_virus_strain_IT-150/95  | 1995 | European          | Class II | VI  | VI.1         |
| 100 | AY150146.1 | Newcastle_disease_virus_strain_IT-151/95  | 1995 | European          | Class II | VI  | VI.1         |
| 101 | AY150147.1 | Newcastle_disease_virus_strain_IT-152/96  | 1996 | European          | Class II | VI  | VI.1         |
| 102 | AY150148.1 | Newcastle_disease_virus_strain_IT-153/96  | 1996 | European          | Class II | VI  | VI.1         |
| 103 | AY150149.1 | Newcastle_disease_virus_strain_DE-2653/98 | 1998 | European          | Class II | VI  | VI.2.1.1.1   |
| 104 | AY150150.1 | Newcastle_disease_virus_strain_DE-2654/98 | 1998 | European          | Class II | VI  | VI.2.1.1.1   |
| 105 | AY150151.1 | Newcastle_disease_virus_strain_DE-2663/98 | 1998 | European          | Class II | VI  | VI.2.1.1.1   |
| 106 | AY150152.1 | Newcastle_disease_virus_strain_MX-11/98   | 1998 | North<br>American | Class II | VI  | VI.2.2.1     |
| 107 | AY150153.1 | Newcastle_disease_virus_strain_DE-1383/99 | 1999 | European          | Class II | VI  | VI.2.1.1.1   |
| 108 | AY150154.1 | Newcastle_disease_virus_strain_DE-690/00  | 2000 | European          | Class II | VI  | VI.2.1.1.2.1 |
| 109 | AY150155.1 | Newcastle_disease_virus_strain_HU-1G/00   | 2000 | European          | Class II | VI  | VI.2.1.1.2.1 |
| 110 | AY150156.1 | Newcastle_disease_virus_strain_SE-6/00    | 2000 | European          | Class II | VI  | VI.2.1.1.2.1 |
| 111 | AY150157.1 | Newcastle_disease_virus_strain_SE-7/00    | 2000 | European          | Class II | VI  | VI.2.1.1.2.1 |

|     |            |                                                                  |      |          |          |      |              |
|-----|------------|------------------------------------------------------------------|------|----------|----------|------|--------------|
| 112 | AY150158.1 | Newcastle_disease_virus_strain_SE-8/00                           | 2000 | European | Class II | VI   | VI.2.1.1.2.1 |
| 113 | AY150159.1 | Newcastle_disease_virus_strain_SE-9/00                           | 2000 | European | Class II | VI   | VI.2.1.1.2.1 |
| 114 | AY150160.1 | Newcastle_disease_virus_strain_DE-1266/01                        | 2001 | European | Class II | VI   | VI.2.1.1.2.1 |
| 115 | AY150161.1 | Newcastle_disease_virus_strain_SE-10/01                          | 2001 | European | Class II | VI   | VI.2.1.1.2.1 |
| 116 | AY150162.1 | Newcastle_disease_virus_strain_HR-111/01                         | 2001 | European | Class II | XXI  | XXI.1.1      |
| 117 | AY150163.1 | Newcastle_disease_virus_strain_HR-155/01                         | 2001 | European | Class II | XXI  | XXI.1.1      |
| 118 | AY150164.1 | Newcastle_disease_virus_strain_YU(Vo)-595/01                     | 2001 | European | Class II | VI   | VI.2.1.1.2.1 |
| 119 | AY150165.1 | Newcastle_disease_virus_strain_HR-3/02                           | 2002 | European | Class II | XXI  | XXI.1.1      |
| 120 | AY190518.1 | Newcastle_disease_virus_isolate_HU-1/02                          | 2002 | European | Class II | VI   | VI.2.1.1.2.1 |
| 121 | AY208697.1 | Newcastle_disease_virus_isolate_PPMV1/pigeon/China/HLJ-4/02      | 2002 | China    | Class II | VI   | VI.2.1.1.2.1 |
| 122 | AY236999.1 | Newcastle_disease_virus_Pigeon/ChennaiIndia/2k27/2002            | 2002 | India    | Class II | XIII | XIII.2.2     |
| 123 | AY249136.1 | Newcastle_disease_virus_isolate_pigeon/2k6/Chennai/India/2002    | 2002 | India    | Class II | II   | II           |
| 124 | AY252120.1 | Newcastle_disease_virus_strain_HU-1114/90                        | 1990 | European | Class II | VI   | VI.1         |
| 125 | AY288995.1 | Newcastle_disease_virus_dove/Italy/2736/00                       | 2000 | Italy    | Class II | VI   | VI.2.1.1.1   |
| 126 | AY288996.1 | Newcastle_disease_virus_pigeon/Italy/1166/00                     | 2000 | Italy    | Class II | VI   | VI.2.1.1.1   |
| 127 | AY324318.1 | Newcastle_disease_virus_isolate_APMV-1/2k6/Pigeon/Chennai/India  | ?    | India    | Class II | II   | II           |
| 128 | AY325798.1 | Pigeon_paramyxovirus-1_precursor_                                | 2003 | China    | Class II | VI   | VI.2.2.2     |
| 129 | AY372139.1 | Newcastle_disease_virus_isolate_P85-4-26                         | 1985 | China    | Class II | VI   | VI.1         |
| 130 | AY372141.1 | Newcastle_disease_virus_isolate_P84-1-5                          | 1984 | China    | Class II | VII  | VII.1.2      |
| 131 | AY372142.1 | Newcastle_disease_virus_isolate_P95-2-17                         | 1995 | China    | Class II | II   | II           |
| 132 | AY372143.1 | Newcastle_disease_virus_isolate_P95-3-22                         | 1995 | China    | Class II | VII  | VII.1.2      |
| 133 | AY372144.1 | Newcastle_disease_virus_isolate_P95-3-23                         | 1995 | China    | Class II | II   | II           |
| 134 | AY372145.1 | Newcastle_disease_virus_isolate_P96-9-4                          | 1996 | China    | Class II | VII  | VII.1.2      |
| 135 | AY378322.1 | Newcastle_disease_virus_isolate_APMV-1/2k27/Pigeon/Chennai/India | ?    | India    | Class II | XIII | XIII.2.2     |
| 136 | AY390288.1 | Newcastle_disease_virus_isolate_YZ9712                           | 1997 | China    | Class II | VI   | VI.2.2.2     |
| 137 | AY390289.1 | Newcastle_disease_virus_isolate_NC9701                           | 1997 | China    | Class II | VI   | VI.2.2.2     |

|     |            |                                                         |      |                      |          |    |              |
|-----|------------|---------------------------------------------------------|------|----------------------|----------|----|--------------|
| 138 | AY390290.1 | Newcastle_disease_virus_isolate_NP9904                  | 1999 | China                | Class II | VI | VI.2.2.2     |
| 139 | AY390291.1 | Newcastle_disease_virus_isolate_PB9601                  | 1996 | China                | Class II | VI | VI.2.2.2     |
| 140 | AY390292.1 | Newcastle_disease_virus_isolate_SZa9803                 | 1998 | China                | Class II | VI | VI.2.2.2     |
| 141 | AY390314.1 | Newcastle_disease_virus_strain_PK9910                   | 1999 | China                | Class II | II | II           |
| 142 | AY428960.1 | Newcastle_disease_virus_PPMV1/Pigeon/CA/2003            | 2003 | USA                  | Class II | VI | VI.2.1.1.1   |
| 143 | AY438667.1 | Newcastle_disease_virus_isolate_Dove/U.S.(CA)/9547/03   | 2003 | USA                  | Class II | V  | V.1          |
| 144 | AY444501.1 | Newcastle_disease_virus_strain_pigeon/U.S.(TX)/17498/98 | 1998 | USA                  | Class II | VI | VI.2.2.1     |
| 145 | AY445669.1 | Newcastle_disease_virus_isolate_ZA469/PPMV1/02          | 2002 | South Africa         | Class II | VI | VI.2.1.1.1   |
| 146 | AY471721.1 | Newcastle_disease_virus_strain_PAEPI00377               | 2000 | United Arab Emirates | Class II | I  | I.1.1        |
| 147 | AY471722.1 | Newcastle_disease_virus_strain_PIEPI00246               | 2000 | Ireland              | Class II | VI | VI.2.1.1.2.1 |
| 148 | AY471723.1 | Newcastle_disease_virus_strain_PUKPI02430               | 2002 | United Kingdom       | Class II | VI | VI.2.1.1.2.1 |
| 149 | AY471724.1 | Newcastle_disease_virus_strain_-IEPI00242               | 2000 | Ireland              | Class II | VI | VI.2.1.1.2.1 |
| 150 | AY471725.1 | Newcastle_disease_virus_strain_PUKPI02428               | 2002 | United Kingdom       | Class II | VI | VI.2.1.1.2.2 |
| 151 | AY471726.1 | Newcastle_disease_virus_strain_PUKPI00250               | 2000 | United Kingdom       | Class II | VI | VI.2.1.1.2.1 |
| 152 | AY471727.1 | Newcastle_disease_virus_strain_PUKPI02429               | 2002 | United Kingdom       | Class II | VI | VI.2.1.1.2.2 |
| 153 | AY471728.1 | Newcastle_disease_virus_strain_PAEPI00318               | 2000 | United Arab Emirates | Class II | VI | VI.2.1.1.2.1 |
| 154 | AY471729.1 | Newcastle_disease_virus_strain_PBEPI98389               | 1998 | Belgium              | Class II | VI | VI.2.1.1.2.1 |
| 155 | AY471730.1 | Newcastle_disease_virus_strain_PUKPI02423               | 2002 | United Kingdom       | Class II | VI | VI.2.1.1.2.1 |
| 156 | AY471731.1 | Newcastle_disease_virus_strain_PUKPI02433               | 2002 | United               | Class II | VI | VI.2.1.1.2.1 |

|     |            |                                           |      |                      |          |    |              |  |
|-----|------------|-------------------------------------------|------|----------------------|----------|----|--------------|--|
|     |            |                                           |      |                      | Kingdom  |    |              |  |
| 157 | AY471732.1 | Newcastle_disease_virus_strain_PIEPI01363 | 2001 | Ireland              | Class II | VI | VI.2.1.1.2.1 |  |
| 158 | AY471733.1 | Newcastle_disease_virus_strain_PIEPI01369 | 2001 | Ireland              | Class II | VI | VI.2.1.1.2.1 |  |
| 159 | AY471734.1 | Newcastle_disease_virus_strain_PUKPI02440 | 2002 | United Kingdom       | Class II | VI | VI.2.1.1.2.1 |  |
| 160 | AY471735.1 | Newcastle_disease_virus_strain_PCAPI91374 | 1991 | Canada               | Class II | VI | VI.2.1.1.2.1 |  |
| 161 | AY471736.1 | Newcastle_disease_virus_strain_PUKPI01421 | 2001 | United Kingdom       | Class II | VI | VI.2.1.1.2.1 |  |
| 162 | AY471737.1 | Newcastle_disease_virus_strain_PIEPI02436 | 2002 | Ireland              | Class II | VI | VI.2.1.1.2.2 |  |
| 163 | AY471738.1 | Newcastle_disease_virus_strain_PDKPI00316 | 2000 | Germany              | Class II | VI | VI.2.1.1.2.1 |  |
| 164 | AY471739.1 | Newcastle_disease_virus_strain_PDKPI01322 | 2001 | Germany              | Class II | VI | VI.2.1.1.2.1 |  |
| 165 | AY471740.1 | Newcastle_disease_virus_strain_PSEPI00317 | 2000 | Sweden               | Class II | VI | VI.2.1.1.2.1 |  |
| 166 | AY471742.1 | Newcastle_disease_virus_strain_PITDO01321 | 2001 | Italy                | Class II | VI | VI.2.1.1.2.1 |  |
| 167 | AY471743.1 | Newcastle_disease_virus_strain_PIEPI01387 | 2001 | Ireland              | Class II | VI | VI.2.1.1.2.1 |  |
| 168 | AY471744.1 | Newcastle_disease_virus_strain_PIEPI00339 | 2001 | Ireland              | Class II | VI | VI.2.1.1.2.1 |  |
| 169 | AY471745.1 | Newcastle_disease_virus_strain_PAEPI00366 | 2000 | United Arab Emirates | Class II | VI | VI.2.1.1.2.1 |  |
| 170 | AY471746.1 | Newcastle_disease_virus_strain_PUKPI00248 | 2000 | United Kingdom       | Class II | VI | VI.2.1.1.2.1 |  |
| 171 | AY471747.1 | Newcastle_disease_virus_strain_PBEPI98327 | 1998 | Belgium              | Class II | VI | VI.2.1.1.2.1 |  |
| 172 | AY471748.1 | Newcastle_disease_virus_strain_PUKPI86240 | 1986 | United Kingdom       | Class II | VI | VI.1         |  |
| 173 | AY471749.1 | Newcastle_disease_virus_strain_PUKPI01376 | 2001 | United Kingdom       | Class II | VI | VI.2.1.1.2.1 |  |
| 174 | AY471750.1 | Newcastle_disease_virus_strain_PBEPI98328 | 1998 | Belgium              | Class II | VI | VI.2.1.1.2.1 |  |
| 175 | AY471751.1 | Newcastle_disease_virus_strain_PUKPI02422 | 2002 | United               | Class II | VI | VI.2.1.1.2.1 |  |



|     |            |                                           |      |                |          |    |              |  |
|-----|------------|-------------------------------------------|------|----------------|----------|----|--------------|--|
|     |            |                                           |      |                | Kingdom  |    |              |  |
| 176 | AY471752.1 | Newcastle_disease_virus_strain_PUKPI01383 | 2001 | United Kingdom | Class II | VI | VI.2.1.1.2.1 |  |
| 177 | AY471753.1 | Newcastle_disease_virus_strain_PUKPI01426 | 2001 | United Kingdom | Class II | VI | VI.2.1.1.2.1 |  |
| 178 | AY471754.1 | Newcastle_disease_virus_strain_PUKPI02435 | 2002 | United Kingdom | Class II | VI | VI.2.1.1.2.1 |  |
| 179 | AY471755.1 | Newcastle_disease_virus_strain_PUKPI02431 | 2002 | United Kingdom | Class II | VI | VI.2.1.1.2.1 |  |
| 180 | AY471756.1 | Newcastle_disease_virus_strain_PUKPI02434 | 2002 | United Kingdom | Class II | VI | VI.2.1.1.2.1 |  |
| 181 | AY471757.1 | Newcastle_disease_virus_strain_PDEPI95293 | 1995 | Germany        | Class II | VI | VI.2.1.1.1   |  |
| 182 | AY471758.1 | Newcastle_disease_virus_strain_PUKPI90213 | 1990 | United Kingdom | Class II | VI | VI.2.1.1.1   |  |
| 183 | AY471759.1 | Newcastle_disease_virus_strain_PATPI95295 | 1995 | Austria        | Class II | VI | VI.2.1.1.1   |  |
| 184 | AY471760.1 | Newcastle_disease_virus_strain_PATPI98206 | 1998 | Austria        | Class II | VI | VI.2.1.1.1   |  |
| 185 | AY471761.1 | Newcastle_disease_virus_strain_PDKPI93202 | 1993 | Germany        | Class II | VI | VI.2.1.1.1   |  |
| 186 | AY471762.1 | Newcastle_disease_virus_strain_PDEPI94409 | 1994 | Germany        | Class II | VI | VI.2.1.1.1   |  |
| 187 | AY471763.1 | Newcastle_disease_virus_strain_PDEPI94216 | 1994 | Germany        | Class II | VI | VI.2.1.1.1   |  |
| 188 | AY471764.1 | Newcastle_disease_virus_strain_PUKPI94400 | 1994 | United Kingdom | Class II | VI | VI.2.1.1.1   |  |
| 189 | AY471765.1 | Newcastle_disease_virus_strain_PFRPI98372 | 1998 | France         | Class II | VI | VI.2.1.1.1   |  |
| 190 | AY471766.1 | Newcastle_disease_virus_strain_PUKPI98355 | 1998 | United Kingdom | Class II | VI | VI.2.1.1.1   |  |
| 191 | AY471767.1 | Newcastle_disease_virus_strain_PDEPI94217 | 1994 | Germany        | Class II | VI | VI.2.1.1.1   |  |
| 192 | AY471768.1 | Newcastle_disease_virus_strain_PIEPI96349 | 1996 | Ireland        | Class II | VI | VI.2.1.1.1   |  |

|     |            |                                           |
|-----|------------|-------------------------------------------|
| 193 | AY471769.1 | Newcastle_disease_virus_strain_PITPI99232 |
| 194 | AY471771.1 | Newcastle_disease_virus_strain_PATPI97205 |
| 195 | AY471774.1 | Newcastle_disease_virus_strain_PPTPI01315 |
| 196 | AY471775.1 | Newcastle_disease_virus_strain_PPTPI99395 |
| 197 | AY471776.1 | Newcastle_disease_virus_strain_PPTPI98388 |
| 198 | AY471777.1 | Newcastle_disease_virus_strain_PPTPI99393 |
| 199 | AY471778.1 | Newcastle_disease_virus_strain_PATPI97345 |
| 200 | AY471779.1 | Newcastle_disease_virus_strain_PAEPI98367 |
| 201 | AY471780.1 | Newcastle_disease_virus_strain_PAEPI99361 |
| 202 | AY471781.1 | Newcastle_disease_virus_strain_PAEPI96210 |
| 203 | AY471782.1 | Newcastle_disease_virus_strain_PAEPI97415 |
| 204 | AY471786.1 | Newcastle_disease_virus_strain_PSAPI98390 |
| 205 | AY471788.1 | Newcastle_disease_virus_strain_PILPI01381 |
| 206 | AY471789.1 | Newcastle_disease_virus_strain_PATPI00323 |
| 207 | AY471790.1 | Newcastle_disease_virus_strain_PUKPI89228 |
| 208 | AY471791.1 | Newcastle_disease_virus_strain_PUKPI89283 |
| 209 | AY471792.1 | Newcastle_disease_virus_strain_PUKPI90218 |
| 210 | AY471793.1 | Newcastle_disease_virus_strain_PUKPI88286 |

|      |                         |          |     |              |
|------|-------------------------|----------|-----|--------------|
| 1999 | Italy                   | Class II | VI  | VI.2.1.1.1   |
| 1997 | Austria                 | Class II | VI  | VI.2.1.1.1   |
| 2001 | Portugal                | Class II | VI  | VI.2.1.1.2.1 |
| 1999 | Portugal                | Class II | VI  | VI.2.1.1.2.1 |
| 1998 | Portugal                | Class II | VI  | VI.2.1.1.2.2 |
| 1999 | Portugal                | Class II | VI  | VI.2.1.1.2.1 |
| 1997 | Austria                 | Class II | VI  | VI.2.1.1.2.1 |
| 1998 | United Arab<br>Emirates | Class II | VI  | VI.2.1.2     |
| 1999 | United Arab<br>Emirates | Class II | VI  | VI.2.1.2     |
| 1996 | United Arab<br>Emirates | Class II | VI  | VI.2.1.2     |
| 1997 | United Arab<br>Emirates | Class II | VI  | VI.2.1.2     |
| 1998 | Saudi<br>Arabia         | Class II | VI  | VI.2.1.2     |
| 2001 | Israel                  | Class II | VI  | VI.2.1.2     |
| 2000 | Austria                 | Class II | XXI | XXI.1.1      |
| 1989 | United<br>Kingdom       | Class II | VI  | VI.2.2.1     |
| 1989 | United<br>Kingdom       | Class II | VI  | VI.2.2.1     |
| 1990 | United<br>Kingdom       | Class II | VI  | VI.1         |
| 1988 | United                  | Class II | VI  | VI.2.2.1     |

|     |            |                                           |      |                |          |    |  |          |
|-----|------------|-------------------------------------------|------|----------------|----------|----|--|----------|
|     |            |                                           |      |                | Kingdom  |    |  |          |
| 211 | AY471794.1 | Newcastle_disease_virus_strain_PFIPI92333 | 1992 | Finland        | Class II | VI |  | VI.2.2.1 |
| 212 | AY471795.1 | Newcastle_disease_virus_strain_PCAPI93347 | 1993 | Canada         | Class II | VI |  | VI.2.2.1 |
| 213 | AY471796.1 | Newcastle_disease_virus_strain_PCAPI90411 | 1990 | Canada         | Class II | VI |  | VI.2.2.1 |
| 214 | AY471797.1 | Newcastle_disease_virus_strain_PCAPI91412 | 1991 | Canada         | Class II | VI |  | VI.2.2.1 |
| 215 | AY471798.1 | Newcastle_disease_virus_strain_PUKPI90236 | 1990 | United Kingdom | Class II | VI |  | VI.1     |
| 216 | AY471799.1 | Newcastle_disease_virus_strain_PUKPI91344 | 1991 | United Kingdom | Class II | VI |  | VI.1     |
| 217 | AY471800.1 | Newcastle_disease_virus_strain_PUKPI91233 | 1991 | United Kingdom | Class II | VI |  | VI.1     |
| 218 | AY471801.1 | Newcastle_disease_virus_strain_PUKPI90221 | 1990 | United Kingdom | Class II | VI |  | VI.1     |
| 219 | AY471802.1 | Newcastle_disease_virus_strain_PUKPI90222 | 1990 | United Kingdom | Class II | VI |  | VI.1     |
| 220 | AY471803.1 | Newcastle_disease_virus_strain_PUKPI90230 | 1990 | United Kingdom | Class II | VI |  | VI.1     |
| 221 | AY471804.1 | Newcastle_disease_virus_strain_PUKPI90237 | 1990 | United Kingdom | Class II | VI |  | VI.1     |
| 222 | AY471805.1 | Newcastle_disease_virus_strain_PUKPI91353 | 1991 | United Kingdom | Class II | VI |  | VI.1     |
| 223 | AY471807.1 | Newcastle_disease_virus_strain_PIEPI92332 | 1992 | Ireland        | Class II | VI |  | VI.1     |
| 224 | AY471810.1 | Newcastle_disease_virus_strain_PUKPI90397 | 1990 | United Kingdom | Class II | VI |  | VI.1     |
| 225 | AY471811.1 | Newcastle_disease_virus_strain_PUKPI--417 | ?    | United Kingdom | Class II | VI |  | VI.1     |

|     |            |                                           |      |                |          |    |            |
|-----|------------|-------------------------------------------|------|----------------|----------|----|------------|
| 226 | AY471812.1 | Newcastle_disease_virus_strain_PUKPI--418 | ?    | United Kingdom | Class II | VI | VI.1       |
| 227 | AY471813.1 | Newcastle_disease_virus_strain_PUKPI93399 | 1993 | United Kingdom | Class II | VI | VI.2.1.1.1 |
| 228 | AY471814.1 | Newcastle_disease_virus_strain_PUKPI93404 | 1993 | United Kingdom | Class II | VI | VI.1       |
| 229 | AY471815.1 | Newcastle_disease_virus_strain_PIEPI91375 | 1991 | Ireland        | Class II | VI | VI.2.1.1.1 |
| 230 | AY471816.1 | Newcastle_disease_virus_strain_PUKPI93396 | 1993 | United Kingdom | Class II | VI | VI.1       |
| 231 | AY471817.1 | Newcastle_disease_virus_strain_PUKDO96438 | 1996 | United Kingdom | Class II | VI | VI.1       |
| 232 | AY471819.1 | Newcastle_disease_virus_strain_PUKPI90214 | 1990 | United Kingdom | Class II | VI | VI.1       |
| 233 | AY471820.1 | Newcastle_disease_virus_strain_PUKPI88256 | 1988 | United Kingdom | Class II | VI | VI.1       |
| 234 | AY471821.1 | Newcastle_disease_virus_strain_PUKPI88284 | 1988 | United Kingdom | Class II | VI | VI.1       |
| 235 | AY471822.1 | Newcastle_disease_virus_strain_PUKPI88290 | 1988 | United Kingdom | Class II | VI | VI.1       |
| 236 | AY471823.1 | Newcastle_disease_virus_strain_PUKPI88238 | 1988 | United Kingdom | Class II | VI | VI.1       |
| 237 | AY471824.1 | Newcastle_disease_virus_strain_PUKPI86244 | 1986 | United Kingdom | Class II | VI | VI.1       |
| 238 | AY471825.1 | Newcastle_disease_virus_strain_PUKPI90275 | 1990 | United Kingdom | Class II | VI | VI.1       |
| 239 | AY471826.1 | Newcastle_disease_virus_strain_PUKPI89229 | 1989 | United         | Class II | VI | VI.1       |

|     |            |                                           |      |                |          |    |            |  |
|-----|------------|-------------------------------------------|------|----------------|----------|----|------------|--|
|     |            |                                           |      |                | Kingdom  |    |            |  |
| 240 | AY471827.1 | Newcastle_disease_virus_strain_PUKPI89231 | 1989 | United Kingdom | Class II | VI | VI.1       |  |
| 241 | AY471828.1 | Newcastle_disease_virus_strain_PUKPI90280 | 1990 | United Kingdom | Class II | VI | VI.1       |  |
| 242 | AY471829.1 | Newcastle_disease_virus_strain_PIEPI90215 | 1990 | Ireland        | Class II | VI | VI.1       |  |
| 243 | AY471830.1 | Newcastle_disease_virus_strain_PUKPI88224 | 1988 | United Kingdom | Class II | VI | VI.1       |  |
| 244 | AY471831.1 | Newcastle_disease_virus_strain_PUKPI88249 | 1988 | United Kingdom | Class II | VI | VI.1       |  |
| 245 | AY471832.1 | Newcastle_disease_virus_strain_PUKPI88234 | 1988 | United Kingdom | Class II | VI | VI.1       |  |
| 246 | AY471833.1 | Newcastle_disease_virus_strain_PUKPI86247 | 1986 | United Kingdom | Class II | VI | VI.1       |  |
| 247 | AY471834.1 | Newcastle_disease_virus_strain_PHUPI84357 | 1984 | Hungary        | Class II | VI | VI.1       |  |
| 248 | AY471835.1 | Newcastle_disease_virus_strain_PUKPI94401 | 1994 | United Kingdom | Class II | VI | VI.2.1.1.1 |  |
| 249 | AY471836.1 | Newcastle_disease_virus_strain_PUKPI89226 | 1989 | United Kingdom | Class II | VI | VI.2.1.1.1 |  |
| 250 | AY471837.1 | Newcastle_disease_virus_strain_PITPI94406 | 1994 | Italy          | Class II | VI | VI.1       |  |
| 251 | AY471838.1 | Newcastle_disease_virus_strain_PITPI98371 | 1998 | Italy          | Class II | VI | VI.1       |  |
| 252 | AY471840.1 | Newcastle_disease_virus_strain_PITPI97341 | 1997 | Italy          | Class II | VI | VI.1       |  |
| 253 | AY471841.1 | Newcastle_disease_virus_strain_PITPI96407 | 1996 | Italy          | Class II | VI | VI.1       |  |
| 254 | AY471842.1 | Newcastle_disease_virus_strain_PITPI90414 | 1990 | Italy          | Class II | VI | VI.1       |  |
| 255 | AY471844.1 | Newcastle_disease_virus_strain_PATPI96335 | 1996 | Austria        | Class II | VI | VI.1       |  |
| 256 | AY471845.1 | Newcastle_disease_virus_strain_PATPI96413 | 1996 | Austria        | Class II | VI | VI.1       |  |

|     |            |                                                               |      |                |          |      |              |
|-----|------------|---------------------------------------------------------------|------|----------------|----------|------|--------------|
| 257 | AY471846.1 | Newcastle_disease_virus_strain_PITDO00289                     | 2000 | Italy          | Class II | VI   | VI.1         |
| 258 | AY471847.1 | Newcastle_disease_virus_strain_PUKPI84259                     | 1984 | United Kingdom | Class II | VI   | VI.2.1.1.1   |
| 259 | AY471848.1 | Newcastle_disease_virus_strain_PUKPI84260                     | 1984 | United Kingdom | Class II | VI   | VI.2.1.1.1   |
| 260 | AY471849.1 | Newcastle_disease_virus_strain_PBEP184352                     | 1984 | Belgium        | Class II | VI   | VI.1         |
| 261 | AY471850.1 | Newcastle_disease_virus_strain_PITPI84354                     | 1984 | Italy          | Class II | VI   | VI.2.1.1.1   |
| 262 | AY471851.1 | Newcastle_disease_virus_strain_PUKPI83264                     | 1983 | United Kingdom | Class II | VI   | VI.2.1.1.1   |
| 263 | AY471852.1 | Newcastle_disease_virus_strain_PUKPI83299                     | 1983 | United Kingdom | Class II | VI   | VI.2.1.1.1   |
| 264 | AY471854.1 | Newcastle_disease_virus_strain_PUKPI86239                     | 1986 | United Kingdom | Class II | VI   | VI.1         |
| 265 | AY471855.1 | Newcastle_disease_virus_strain_PUKPI84342                     | 1984 | United Kingdom | Class II | VI   | VI.2.1.1.1   |
| 266 | AY471856.1 | Newcastle_disease_virus_strain_PHKPI86358                     | 1986 | China          | Class II | VI   | VI.1         |
| 267 | AY471857.1 | Newcastle_disease_virus_strain_PIQPI78442                     | 1978 | Iraq           | Class II | VI   | VI.1         |
| 268 | AY581301.1 | Newcastle_disease_virus_isolate_PiAD388/Quail/India           | ?    | India          | Class II | VI   | VI.2.1.1.2.2 |
| 269 | AY581302.1 | Newcastle_disease_virus_isolate_PiAD33/Guinea_fowl/India      | ?    | India          | Class II | XIII | XIII.1.2     |
| 270 | AY581303.1 | Newcastle_disease_virus_isolate_PiAD18/Guinea_fowl/India      | ?    | India          | Class II | XIII | XIII.1.2     |
| 271 | AY581304.1 | Newcastle_disease_virus_isolate_PiAD55/Pigeon/India           | ?    | India          | Class II | XXI  | XXI.1.2      |
| 272 | AY581305.1 | Newcastle_disease_virus_isolate_PiADPrd/Pigeon/India          | ?    | India          | Class II | XXI  | XXI.1.2      |
| 273 | AY635814.1 | Newcastle_disease_virus_isolate_Gxp22                         | ?    | China          | Class II | VI   | VI.2.1.1.2.1 |
| 274 | AY635815.1 | Newcastle_disease_virus_isolate_Gxp40                         | ?    | China          | Class II | VII  | VII.1.1      |
| 275 | AY734535.1 | Newcastle_disease_virus_isolate_Pigeon/Argentina/Tigre_6/99   | 1999 | Argentina      | Class II | XXI  | XXI.2        |
| 276 | AY734536.1 | Newcastle_disease_virus_isolate_Pigeon/Argentina/Capital_3/97 | 1997 | Argentina      | Class II | VI   | VI.2.1.2     |

|     |            |                                                             |      |              |          |    |              |
|-----|------------|-------------------------------------------------------------|------|--------------|----------|----|--------------|
| 277 | DQ417113.1 | Newcastle_disease_virus_isolate_STP96_                      | 1996 | China        | Class II | VI | VI.2.2.2     |
| 278 | DQ485274.1 | Newcastle_disease_virus_isolate_dove/Guangxi15/2005         | 2005 | China        | Class II | I  | I.1.1        |
| 279 | DQ904250.1 | Newcastle_disease_virus_strain_NDV/pigeon/QC/SHY-01922/2006 | 2006 | Canada       | Class II | VI | VI.2.1.1.1   |
| 280 | EF026584.1 | Newcastle_disease_virus_strain_248_VB                       | 1998 | Belgium      | Class II | VI | VI.2.1.1.2.1 |
| 281 | EF030950.1 | Newcastle_disease_virus_strain_PIZA06N642                   | 2006 | South Africa | Class II | VI | VI.2.1.1.1   |
| 282 | EF030951.1 | Newcastle_disease_virus_strain_CKZA06N606                   | 2005 | South Africa | Class II | VI | VI.2.1.1.2.1 |
| 283 | EF030952.1 | Newcastle_disease_virus_strain_DOZA05AM68313                | 2005 | South Africa | Class II | I  | I.1.1        |
| 284 | EF030953.1 | Newcastle_disease_virus_strain_DOZA05N240                   | 2005 | South Africa | Class II | VI | VI.2.1.1.2.1 |
| 285 | EF030954.1 | Newcastle_disease_virus_strain_DOZA05N247                   | 2005 | South Africa | Class II | VI | VI.2.1.1.1   |
| 286 | EF030955.1 | Newcastle_disease_virus_strain_DOZA05N417                   | 2005 | South Africa | Class II | VI | VI.2.1.1.1   |
| 287 | EF030956.1 | Newcastle_disease_virus_strain_DOZA05N539                   | 2005 | South Africa | Class II | VI | VI.2.1.1.1   |
| 288 | EF030957.1 | Newcastle_disease_virus_strain_DOZA06N549                   | 2006 | South Africa | Class II | VI | VI.2.1.1.1   |
| 289 | EF030958.1 | Newcastle_disease_virus_strain_DOZA06N589                   | 2006 | South Africa | Class II | VI | VI.2.1.1.1   |
| 290 | EF030959.1 | Newcastle_disease_virus_strain_DOZA06N591                   | 2006 | South Africa | Class II | VI | VI.2.1.1.2.1 |
| 291 | EF030960.1 | Newcastle_disease_virus_strain_DOZA06N621                   | 2006 | South Africa | Class II | VI | VI.2.1.1.1   |
| 292 | EF030961.1 | Newcastle_disease_virus_strain_DOZA06UP470                  | 2006 | South Africa | Class II | VI | VI.2.1.1.2.1 |
| 293 | EF030962.1 | Newcastle_disease_virus_strain_PIZA04N230                   | 2004 | South Africa | Class II | VI | VI.2.1.1.1   |
| 294 | EF030963.1 | Newcastle_disease_virus_strain_PIZA05N277                   | 2005 | South Africa | Class II | VI | VI.2.1.1.2.1 |
| 295 | EF030964.1 | Newcastle_disease_virus_strain_PIZA06N635                   | 2006 | South Africa | Class II | VI | VI.2.1.1.1   |
| 296 | EF364037.1 | Newcastle_disease_virus_isolate_Vh_1342-05                  | 2005 | Slovakia     | Class II | VI | VI.2.1.1.2.1 |
| 297 | EF364038.1 | Newcastle_disease_virus_isolate_Vh_1343-05                  | 2005 | Slovakia     | Class II | VI | VI.2.1.1.2.1 |
| 298 | EF520716.1 | Newcastle_disease_virus_strain_pigeon/NY/US/1984            | 1984 | USA          | Class II | VI | VI.1         |
| 299 | EF534701.1 | Newcastle_disease_virus_nonfunctional                       | ?    | Brazil       | Class II | V  | V.1          |
| 300 | EF589137.1 | Newcastle_disease_virus_strain_GZ                           | ?    | China        | Class II | XX | XX           |
| 301 | EU240576.1 | Newcastle_disease_virus_isolate_Vh_357-06                   | 2006 | Slovakia     | Class II | VI | VI.2.1.1.2.1 |
| 302 | EU240578.1 | Newcastle_disease_virus_isolate_Vh_448-06                   | 2006 | Slovakia     | Class II | VI | VI.2.1.1.2.1 |

|     |            |                                                                        |      |          |          |    |              |
|-----|------------|------------------------------------------------------------------------|------|----------|----------|----|--------------|
| 303 | EU240580.1 | Newcastle_disease_virus_isolate_Vh_529-06                              | 2006 | Slovakia | Class II | VI | VI.2.1.1.2.1 |
| 304 | EU240582.1 | Newcastle_disease_virus_isolate_Vh_536-06                              | 2006 | Slovakia | Class II | VI | VI.2.1.1.2.1 |
| 305 | EU240583.1 | Newcastle_disease_virus_isolate_Vh_538-06                              | 2006 | Slovakia | Class II | VI | VI.2.1.1.2.1 |
| 306 | EU416228.1 | Newcastle_disease_virus_isolate_SCP1                                   | ?    | China    | Class II | VI | VI.2.2.2     |
| 307 | EU477188.1 | Avian_orthoavulavirus_1_strain_dove/US/TX-B2580/2004                   | 2004 | USA      | Class II | VI | VI.2.1.1.1   |
| 308 | EU477189.1 | Avian_orthoavulavirus_1_strain_pigeon/US/RI166/2000                    | 2000 | USA      | Class II | VI | VI.2.1.1.1   |
| 309 | EU477190.1 | Avian_orthoavulavirus_1_strain_pigeon/US/TX3503/2004                   | 2004 | USA      | Class II | VI | VI.2.1.1.1   |
| 310 | EU477191.1 | Avian_orthoavulavirus_1_strain_Eurasian_collared_dove/US/TX3988/2004   | 2004 | USA      | Class II | VI | VI.2.1.1.1   |
| 311 | EU477192.1 | Avian_orthoavulavirus_1_strain_Eurasian_collared_dove/US/TX4156/2005   | 2005 | USA      | Class II | VI | VI.2.1.1.1   |
| 312 | EU477193.1 | Avian_orthoavulavirus_1_strain_Eurasian_collared_dove/US/TX2334/2003   | 2003 | USA      | Class II | VI | VI.2.1.1.1   |
| 313 | EU477194.1 | Avian_orthoavulavirus_1_strain_Eurasian_collared_dove/US/TX3817/2004   | 2004 | USA      | Class II | VI | VI.2.1.1.1   |
| 314 | EU477195.2 | Avian_orthoavulavirus_1_strain_Eurasian_collared_dove/US/TX6295/2006   | 2006 | USA      | Class II | VI | VI.2.1.1.1   |
| 315 | EU477196.1 | Avian_orthoavulavirus_1_strain_Eurasian_collared_dove/US/TX6306/2007   | 2007 | USA      | Class II | VI | VI.2.1.1.1   |
| 316 | EU477197.1 | Avian_orthoavulavirus_1_strain_Eurasian_collared_dove/US/TX6338/2007   | 2007 | USA      | Class II | VI | VI.2.1.1.1   |
| 317 | EU477198.1 | Avian_orthoavulavirus_1_strain_pigeon/US/TX3377/2004                   | 2004 | USA      | Class II | VI | VI.2.1.1.1   |
| 318 | EU477199.1 | Avian_orthoavulavirus_1_strain_Eurasian_collared_dove/US/TX3908/2004   | 2004 | USA      | Class II | VI | VI.2.1.1.1   |
| 319 | EU477200.1 | Avian_orthoavulavirus_1_strain_mourning_dove/US/TX4048/2004            | 2004 | USA      | Class II | VI | VI.2.1.1.1   |
| 320 | EU477201.1 | Avian_orthoavulavirus_1_strain_Eurasian_collared_dove/US/TX4078/2004   | 2004 | USA      | Class II | VI | VI.2.1.1.1   |
| 321 | EU477202.1 | Avian_orthoavulavirus_1_strain_pigeon/US/TX4142/2005                   | 2005 | USA      | Class II | VI | VI.2.1.1.1   |
| 322 | EU518682.1 | Avian_orthoavulavirus_1_isolate_dove/Mexico(Distrito_Federal)/462/2004 | 2004 | Mexico   | Class II | V  | V.3          |
| 323 | EU780902.1 | Newcastle_disease_virus_isolate_NDV/pigeon/Dnipro/2007                 | 2007 | Ukraine  | Class II | I  | I.1.1        |
| 324 | FJ410145.1 | Pigeon_paramyxovirus-1_strain_PPMV-1/New_York/1984                     | 1984 | USA      | Class II | VI | VI.1         |
| 325 | FJ410147.1 | Pigeon_paramyxovirus-1_strain_PPMV-1/Maryl/1984                        | 1984 | USA      | Class II | VI | VI.1         |
| 326 | FJ410148.1 | Pigeon_paramyxovirus-1_strain_PPMV-1/Texas/1998                        | 1998 | USA      | Class II | VI | VI.2.2.1     |
| 327 | FJ480825.1 | Newcastle_disease_virus_strain_PG/CH/JS/1/05                           | 2005 | China    | Class II | VI | VI.2.2.2     |
| 328 | FJ480826.1 | Newcastle_disease_virus_strain_PG/CH/JS/1/06                           | 2006 | China    | Class II | VI | VI.2.2.2     |



|     |            |                                                                 |      |          |          |     |              |
|-----|------------|-----------------------------------------------------------------|------|----------|----------|-----|--------------|
| 329 | FJ766526.1 | Newcastle_disease_virus_isolate_JS/07/22/Pi                     | 2007 | China    | Class II | VI  | VI.2.1.1.2.1 |
| 330 | FJ766527.1 | Newcastle_disease_virus_isolate_JS/07/16/Pi                     | 2007 | China    | Class II | VI  | VI.2.1.1.2.1 |
| 331 | FJ766530.1 | Newcastle_disease_virus_isolate_JS/07/04/Pi                     | 2007 | China    | Class II | VI  | VI.2.1.1.2.1 |
| 332 | FJ766531.1 | Newcastle_disease_virus_isolate_JS/07/03/Pi                     | 2007 | China    | Class II | VI  | VI.2.1.1.2.1 |
| 333 | FJ865434.1 | Pigeon_paramyxovirus-1_strain_s-1                               | 2002 | China    | Class II | VI  | VI.1         |
| 334 | FJ986192.2 | Newcastle_disease_virus_isolate_2K3/Chennai/Tamil_Nadu          | 2000 | India    | Class II | IV  | IV           |
| 335 | FM200797.1 | Newcastle_disease_virus_partialstrain_pigeon/Nigeria/NIE95/2007 | 2007 | Nigeria  | Class II | VI  | VI.2.1.2     |
| 336 | GQ168928.1 | Newcastle_disease_virus_strain_JSP0204                          | 2002 | China    | Class II | VI  | VI.2.2.2     |
| 337 | GQ245801.1 | Newcastle_disease_virus_isolate_SD-15-08- Pi                    | 2008 | China    | Class II | VII | VII.1.1      |
| 338 | GQ281085.1 | Newcastle_disease_virus_isolate_JS-35-07-Pi                     | 2007 | China    | Class II | VI  | VI.2.1.1.2.1 |
| 339 | GQ281086.1 | Newcastle_disease_virus_isolate_WX-10-07-Pi                     | 2007 | China    | Class II | VI  | VI.2.1.1.2.1 |
| 340 | GQ281087.1 | Newcastle_disease_virus_isolate_YZ-21-07-Pi                     | 2007 | China    | Class II | VI  | VI.2.1.1.2.1 |
| 341 | GQ281088.1 | Newcastle_disease_virus_isolate_YZ-23-07-Pi                     | 2007 | China    | Class II | VI  | VI.2.1.1.2.1 |
| 342 | GQ429292.1 | Pigeon_paramyxovirus-1_strain_AV324/96_                         | 1996 | Ireland  | Class II | VI  | VI.2.1.1.1   |
| 343 | GQ429293.1 | Newcastle_disease_virus_isolate_dove/Italy/2736/00              | 2000 | Italy    | Class II | VI  | VI.2.1.1.1   |
| 344 | GU002424.1 | Newcastle_disease_virus_strain_SLO-304/03                       | 2003 | Slovenia | Class II | VI  | VI.1         |
| 345 | GU002426.1 | Newcastle_disease_virus_strain_SLO-308/03                       | 2003 | Slovenia | Class II | VI  | VI.1         |
| 346 | GU002428.1 | Newcastle_disease_virus_strain_SLO-17/04                        | 2004 | Slovenia | Class II | VI  | VI.2.1.1.2.1 |
| 347 | GU002430.1 | Newcastle_disease_virus_strain_SLO-263/04                       | 2004 | Slovenia | Class II | VI  | VI.2.1.1.2.2 |
| 348 | GU002432.1 | Newcastle_disease_virus_strain_SLO-872/04                       | 2004 | Slovenia | Class II | VI  | VI.2.1.1.2.1 |
| 349 | GU002434.1 | Newcastle_disease_virus_strain_SLO-218/05                       | 2005 | Slovenia | Class II | VI  | VI.2.1.1.2.1 |
| 350 | GU002436.1 | Newcastle_disease_virus_strain_SLO-718/05                       | 2005 | Slovenia | Class II | VI  | VI.2.1.1.2.1 |
| 351 | GU002438.1 | Newcastle_disease_virus_strain_SLO-802/05                       | 2005 | Slovenia | Class II | VI  | VI.2.1.1.2.1 |
| 352 | GU002442.1 | Newcastle_disease_virus_strain_SLO-75/06                        | 2006 | Slovenia | Class II | VI  | VI.2.1.1.2.1 |
| 353 | GU002444.1 | Newcastle_disease_virus_strain_SLO-912/08                       | 2008 | Slovenia | Class II | VI  | VI.2.1.1.2.2 |
| 354 | GU227738.1 | Newcastle_disease_virus_strain_NDV/Serbia/749/2007              | 2007 | Serbia   | Class II | VII | VII.1.1      |

|     |            |                                                                                        |      |            |          |      |              |
|-----|------------|----------------------------------------------------------------------------------------|------|------------|----------|------|--------------|
| 355 | GU551934.1 | Newcastle_disease_virus_strain_carrier-pigeon/Guangdong/2008                           | 2008 | China      | Class II | VI   | VI.2.1.1.2.1 |
| 356 | GU591896.1 | Newcastle_disease_virus_isolate_NDV09-001                                              | 2009 | China      | Class II | II   | II           |
| 357 | GU591897.1 | Newcastle_disease_virus_isolate_NDV09-002                                              | 2009 | China      | Class II | II   | II           |
| 358 | HE972209.1 | Newcastle_disease_virusgenomic_RNA_strain_APMV-1/pigeon/Luxembourg/119/2006            | 2006 | Luxembourg | Class II | VI   | VI.2.1.1.2.1 |
| 359 | HE972212.1 | Newcastle_disease_virusgenomic_RNA_strain_APMV-1/pigeon/Luxembourg/3821-1/2007         | 2007 | Luxembourg | Class II | VI   | VI.2.1.1.2.1 |
| 360 | HE972216.1 | Newcastle_disease_virus_partialgenomic_RNA_strain_APMV-1/pigeon/Luxembourg/2657-2/2006 | 2006 | Luxembourg | Class II | I    | I.1.1        |
| 361 | HG326601.1 | Newcastle_disease_virus_viral_strain_pigeon/Nigeria/NIE07-061/2007                     | 2007 | Nigeria    | Class II | VI   | VI.2.1.2     |
| 362 | HG326602.1 | Newcastle_disease_virus_viral_strain_pigeon/Nigeria/NIE07-062/2007                     | 2007 | Nigeria    | Class II | VI   | VI.2.1.2     |
| 363 | HG326603.1 | Newcastle_disease_virus_viral_strain_pigeon/Nigeria/NIE07-063/2007                     | 2007 | Nigeria    | Class II | VI   | VI.2.1.2     |
| 364 | HG326604.1 | Newcastle_disease_virus_viral_strain_pigeon/Nigeria/NIE09-1898/2009                    | 2009 | Nigeria    | Class II | VI   | VI.2.1.2     |
| 365 | HG424625.1 | Newcastle_disease_virus_strain_pigeon/Nigeria/NIE13-005/2013                           | 2013 | Nigeria    | Class II | XXI  | XXI.2        |
| 366 | HG424626.1 | Newcastle_disease_virus_strain_pigeon/Nigeria/NIE13-008/2013                           | 2013 | Nigeria    | Class II | XXI  | XXI.2        |
| 367 | HG424627.1 | Newcastle_disease_virus_strain_pigeon/Nigeria/NIE13-092/2013                           | 2013 | Nigeria    | Class II | VI   | VI.2.1.2     |
| 368 | HG424628.1 | Newcastle_disease_virus_strain_pigeon/Nigeria/NIE13-093/2013                           | 2013 | Nigeria    | Class II | VI   | VI.2.1.2     |
| 369 | HG424629.1 | Newcastle_disease_virus_strain_pigeon/Nigeria/NIE13-009/2013                           | 2013 | Nigeria    | Class II | VI   | VI.2.1.2     |
| 370 | HM001215.1 | Newcastle_disease_virus_isolate_P-DQ00-4                                               | 2000 | China      | Class II | VI   | VI.2.2.2     |
| 371 | HM001216.1 | Newcastle_disease_virus_isolate_P-QD98-11                                              | 1998 | China      | Class II | VII  | VII.1.1      |
| 372 | HM063425.1 | Newcastle_disease_virus_isolate_P4_                                                    | 1999 | China      | Class II | VI   | VI.2.1.1.2.1 |
| 373 | HM627541.1 | Newcastle_disease_virus_isolate_PPMV-1/PL/H2/10                                        | 2010 | Poland     | Class II | XXI  | XXI.1.1      |
| 374 | HM776583.1 | Newcastle_disease_virus_isolate_JN08                                                   | 2008 | China      | Class II | VI   | VI.2.1.1.2.1 |
| 375 | HQ456873.1 | Newcastle_disease_virus_isolate_NGPG5207                                               | 2007 | Nigeria    | Class II | XVII | XVII         |
| 376 | HQ847859.1 | Pigeon_paramyxovirus_1_strain_W01-121                                                  | 2001 | USA        | Class II | VI   | VI.2.1.1.1   |
| 377 | JF713701.1 | Newcastle_disease_virus_isolate_SD10                                                   | 2010 | China      | Class II | VI   | VI.2.1.1.2.1 |
| 378 | JF749831.1 | Newcastle_disease_virus_isolate_Pigeon/Uruguay/Montevideo/02/08                        | 2008 | Uruguay    | Class II | VI   | VI.2.1.2     |
| 379 | JF823992.1 | Avian_orthoavulavirus_1_isolate_Pi/Rus/Moscow/47/02                                    | 2002 | Russia     | Class II | VI   | VI.2.1.1.2.2 |
| 380 | JF823993.1 | Avian_orthoavulavirus_1_isolate_Pi/Rus/Kemerovo/762-1/05                               | 2005 | Russia     | Class II | VI   | VI.2.1.1.2.2 |

|     |            |                                                          |      |        |          |     |              |
|-----|------------|----------------------------------------------------------|------|--------|----------|-----|--------------|
| 381 | JF823994.1 | Avian_orthoavulavirus_1_isolate_Pi/Rus/Kemerovo/762-2/05 | 2005 | Russia | Class II | VI  | VI.2.1.1.2.2 |
| 382 | JF823995.1 | Avian_orthoavulavirus_1_isolate_Pi/Rus/Vladimir/772/06   | 2006 | Russia | Class II | VI  | VI.2.1.1.2.1 |
| 383 | JF823997.1 | Avian_orthoavulavirus_1_isolate_Pi/Rus/Voronezh/446/01   | 2001 | Russia | Class II | VI  | VI.2.2.1     |
| 384 | JF823998.1 | Avian_orthoavulavirus_1_isolate_Pi/Rus/Moscow/54/02      | 2002 | Russia | Class II | VI  | VI.2.2.1     |
| 385 | JF823999.1 | Avian_orthoavulavirus_1_isolate_Pi/Rus/Altay/446/04      | 2004 | Russia | Class II | XXI | XXI.1.1      |
| 386 | JF824000.1 | Avian_orthoavulavirus_1_isolate_Pi/Rus/Altay/447/04      | 2004 | Russia | Class II | XXI | XXI.1.1      |
| 387 | JF824001.1 | Avian_orthoavulavirus_1_isolate_Pi/Rus/Kemerovo/754-1/05 | 2005 | Russia | Class II | XXI | XXI.1.1      |
| 388 | JF824002.1 | Avian_orthoavulavirus_1_isolate_Pi/Rus/Kemerovo/754-2/05 | 2005 | Russia | Class II | XXI | XXI.1.1      |
| 389 | JF824003.1 | Avian_orthoavulavirus_1_isolate_Pi/Rus/Kemerovo/754-3/05 | 2005 | Russia | Class II | XXI | XXI.1.1      |
| 390 | JF824004.1 | Avian_orthoavulavirus_1_isolate_Pi/Rus/Kemerovo/754-4/05 | 2005 | Russia | Class II | XXI | XXI.1.1      |
| 391 | JF824005.1 | Avian_orthoavulavirus_1_isolate_Pi/Rus/Kemerovo/0004/09  | 2009 | Russia | Class II | XXI | XXI.1.1      |
| 392 | JF824006.1 | Avian_orthoavulavirus_1_isolate_Pi/Rus/Altay/448/04      | 2004 | Russia | Class II | XXI | XXI.1.1      |
| 393 | JF824007.1 | Avian_orthoavulavirus_1_isolate_Pi/Rus/Kemerovo/563-1/05 | 2005 | Russia | Class II | XXI | XXI.1.1      |
| 394 | JF824008.1 | Avian_orthoavulavirus_1_isolate_Pi/Rus/Kemerovo/563-3/05 | 2005 | Russia | Class II | XXI | XXI.1.1      |
| 395 | JF824009.1 | Avian_orthoavulavirus_1_isolate_Pi/Rus/Kemerovo/563-5/05 | 2005 | Russia | Class II | XXI | XXI.1.1      |
| 396 | JF824010.1 | Avian_orthoavulavirus_1_isolate_Pi/Rus/Kemerovo/592-1/05 | 2005 | Russia | Class II | XXI | XXI.1.1      |
| 397 | JF824011.1 | Avian_orthoavulavirus_1_isolate_Pi/Rus/Kemerovo/592-2/05 | 2005 | Russia | Class II | XXI | XXI.1.1      |
| 398 | JF824012.1 | Avian_orthoavulavirus_1_isolate_Pi/Rus/Kemerovo/593-2/05 | 2005 | Russia | Class II | XXI | XXI.1.1      |
| 399 | JF824013.1 | Avian_orthoavulavirus_1_isolate_Pi/Rus/Kemerovo/0267/09  | 2009 | Russia | Class II | XXI | XXI.1.1      |
| 400 | JF824014.1 | Avian_orthoavulavirus_1_isolate_Pi/Rus/Kemerovo/0263/09  | 2009 | Russia | Class II | XXI | XXI.1.1      |
| 401 | JF824015.1 | Avian_orthoavulavirus_1_isolate_Pi/Rus/Kemerovo/0265/09  | 2009 | Russia | Class II | XXI | XXI.1.1      |
| 402 | JF824016.1 | Avian_orthoavulavirus_1_isolate_Pi/Rus/Kemerovo/0268/09  | 2009 | Russia | Class II | XXI | XXI.1.1      |
| 403 | JF824017.1 | Avian_orthoavulavirus_1_isolate_Pi/Rus/Moscow/810/06     | 2006 | Russia | Class II | XXI | XXI.1.1      |
| 404 | JF824018.1 | Avian_orthoavulavirus_1_isolate_Pi/Rus/Moscow/407/04     | 2004 | Russia | Class II | XXI | XXI.1.1      |
| 405 | JF824019.1 | Avian_orthoavulavirus_1_isolate_Pi/Rus/Moscow/424/04     | 2004 | Russia | Class II | XXI | XXI.1.1      |
| 406 | JF824020.1 | Avian_orthoavulavirus_1_isolate_Pi/Rus/Moscow/455/04     | 2004 | Russia | Class II | XXI | XXI.1.2      |

|     |            |                                                                |      |        |          |     |         |
|-----|------------|----------------------------------------------------------------|------|--------|----------|-----|---------|
| 407 | JF824021.1 | Avian_orthoavulavirus_1_isolate_Pi/Rus/Moscow/456/04           | 2004 | Russia | Class II | XXI | XXI.1.1 |
| 408 | JF824022.1 | Avian_orthoavulavirus_1_isolate_Pi/Rus/Moscow/515/04           | 2004 | Russia | Class II | XXI | XXI.1.1 |
| 409 | JF824023.1 | Avian_orthoavulavirus_1_isolate_Pi/Rus/Tver/708-4/05           | 2005 | Russia | Class II | XXI | XXI.1.1 |
| 410 | JF824024.1 | Avian_orthoavulavirus_1_isolate_Pi/Rus/Tver/708-5/05           | 2005 | Russia | Class II | XXI | XXI.1.1 |
| 411 | JF824025.1 | Avian_orthoavulavirus_1_isolate_Pi/Rus/Tver/737-2/05           | 2005 | Russia | Class II | XXI | XXI.1.1 |
| 412 | JF824026.1 | Avian_orthoavulavirus_1_isolate_Pi/Rus/Kovrov/0017/09          | 2009 | Russia | Class II | XXI | XXI.1.1 |
| 413 | JF824027.1 | Avian_orthoavulavirus_1_isolate_Pi/Rus/Tula/0529/08            | 2008 | Russia | Class II | XXI | XXI.1.1 |
| 414 | JF824028.1 | Avian_orthoavulavirus_1_isolate_Pi/Rus/Kursk/0484/09           | 2009 | Russia | Class II | XXI | XXI.1.1 |
| 415 | JF824029.1 | Avian_orthoavulavirus_1_isolate_Pi/Rus/Vladimir/495/04         | 2004 | Russia | Class II | XXI | XXI.1.1 |
| 416 | JF824030.1 | Avian_orthoavulavirus_1_isolate_Pi/Rus/Nizhny_Novgorod/668/05  | 2005 | Russia | Class II | XXI | XXI.1.1 |
| 417 | JF824031.1 | Avian_orthoavulavirus_1_isolate_Pi/Rus/Moscow/680/05           | 2005 | Russia | Class II | XXI | XXI.1.2 |
| 418 | JF824032.1 | Avian_orthoavulavirus_1_isolate_Pi/Rus/Vladimir/687/05         | 2005 | Russia | Class II | XXI | XXI.1.1 |
| 419 | JF824033.1 | Avian_orthoavulavirus_1_isolate_Pi/Rus/Tver/701/05             | 2005 | Russia | Class II | XXI | XXI.1.1 |
| 420 | JF824034.1 | Avian_orthoavulavirus_1_isolate_Pi/Rus/Tver/736-1/05           | 2005 | Russia | Class II | XXI | XXI.1.1 |
| 421 | JF824035.1 | Avian_orthoavulavirus_1_isolate_Pi/Rus/Ivanovo/0347/09         | 2009 | Russia | Class II | XXI | XXI.1.1 |
| 422 | JF824036.1 | Avian_orthoavulavirus_1_isolate_Pi/Rus/Tver/708-1/05           | 2005 | Russia | Class II | XXI | XXI.1.1 |
| 423 | JF824037.1 | Avian_orthoavulavirus_1_isolate_Pi/Rus/Tver/708-2/05           | 2005 | Russia | Class II | XXI | XXI.1.1 |
| 424 | JF824038.1 | Avian_orthoavulavirus_1_isolate_Pi/Rus/Tver/738-3/05           | 2005 | Russia | Class II | XXI | XXI.1.1 |
| 425 | JF824039.1 | Avian_orthoavulavirus_1_isolate_Pi/Rus/Yaroslavl/723-1/05      | 2005 | Russia | Class II | XXI | XXI.1.1 |
| 426 | JF824040.1 | Avian_orthoavulavirus_1_isolate_Pi/Rus/Yaroslavl/742-8/05      | 2005 | Russia | Class II | XXI | XXI.1.1 |
| 427 | JF824041.1 | Avian_orthoavulavirus_1_isolate_Pi/Rus/Yaroslavl/743-9/05      | 2005 | Russia | Class II | XXI | XXI.1.1 |
| 428 | JF824042.1 | Avian_orthoavulavirus_1_isolate_Pi/Rus/Yaroslavl/723-2/05      | 2005 | Russia | Class II | XXI | XXI.1.1 |
| 429 | JF824043.1 | Avian_orthoavulavirus_1_isolate_Pi/Rus/Nizhny_Novgorod/0206/06 | 2006 | Russia | Class II | XXI | XXI.1.1 |
| 430 | JF824044.1 | Avian_orthoavulavirus_1_isolate_Pi/Rus/Archangelsk/0858/07     | 2007 | Russia | Class II | XXI | XXI.1.1 |
| 431 | JF824045.1 | Avian_orthoavulavirus_1_isolate_Pi/Rus/Vladimir/0044/08        | 2008 | Russia | Class II | XXI | XXI.1.1 |
| 432 | JF824046.1 | Avian_orthoavulavirus_1_isolate_Pi/Rus/Moscow/0207/06          | 2006 | Russia | Class II | XXI | XXI.1.1 |

|     |            |                                                                  |      |        |          |     |         |
|-----|------------|------------------------------------------------------------------|------|--------|----------|-----|---------|
| 433 | JF824047.1 | Avian_orthoavulavirus_1_isolate_Pi/Rus/Kostroma/0843/07          | 2007 | Russia | Class II | XXI | XXI.1.1 |
| 434 | JF824048.1 | Avian_orthoavulavirus_1_isolate_Pi/Rus/Arhangelsk/0002/09        | 2009 | Russia | Class II | XXI | XXI.1.1 |
| 435 | JF824049.1 | Avian_orthoavulavirus_1_isolate_Pi/Rus/Arhangelsk/0003/09        | 2009 | Russia | Class II | XXI | XXI.1.1 |
| 436 | JF824050.1 | Avian_orthoavulavirus_1_isolate_Pi/Rus/Kemerovo/0005/09          | 2009 | Russia | Class II | XXI | XXI.1.1 |
| 437 | JF824051.1 | Avian_orthoavulavirus_1_isolate_Pi/Rus/Vologda/0016/09           | 2009 | Russia | Class II | XXI | XXI.1.1 |
| 438 | JF824052.1 | Avian_orthoavulavirus_1_isolate_Pi/Rus/Tver/0067/08              | 2008 | Russia | Class II | XXI | XXI.1.1 |
| 439 | JF824053.1 | Avian_orthoavulavirus_1_isolate_Pi/Rus/Tver/0068/08              | 2008 | Russia | Class II | XXI | XXI.1.1 |
| 440 | JF824054.1 | Avian_orthoavulavirus_1_isolate_Pi/Rus/Tver/0069/08              | 2008 | Russia | Class II | XXI | XXI.1.1 |
| 441 | JF824055.1 | Avian_orthoavulavirus_1_isolate_Pi/Rus/Komi-Uhta/0070/08         | 2008 | Russia | Class II | XXI | XXI.1.1 |
| 442 | JF824056.1 | Avian_orthoavulavirus_1_isolate_Pi/Rus/Komi_Sosnogorsk/0071/08   | 2008 | Russia | Class II | XXI | XXI.1.1 |
| 443 | JF824057.1 | Avian_orthoavulavirus_1_isolate_Pi/Rus/Komi_Sosnogorsk/0072/08   | 2008 | Russia | Class II | XXI | XXI.1.1 |
| 444 | JF824058.1 | Avian_orthoavulavirus_1_isolate_Pi/Rus/Komi/0073/08              | 2008 | Russia | Class II | XXI | XXI.1.1 |
| 445 | JF824059.1 | Avian_orthoavulavirus_1_isolate_Pi/Rus/Komi/0081/08              | 2008 | Russia | Class II | XXI | XXI.1.1 |
| 446 | JF824060.1 | Avian_orthoavulavirus_1_isolate_Pi/Rus/Leningrad/0258/09         | 2009 | Russia | Class II | XXI | XXI.1.1 |
| 447 | JF824061.1 | Avian_orthoavulavirus_1_isolate_Pi/Rus/Tula/0296/09              | 2009 | Russia | Class II | XXI | XXI.1.1 |
| 448 | JF824062.1 | Avian_orthoavulavirus_1_isolate_Pi/Rus/Kostroma/0318/08          | 2008 | Russia | Class II | XXI | XXI.1.1 |
| 449 | JF824063.1 | Avian_orthoavulavirus_1_isolate_Pi/Rus/Ivanovo/0348/09           | 2009 | Russia | Class II | XXI | XXI.1.1 |
| 450 | JF824064.1 | Avian_orthoavulavirus_1_isolate_Pi/Rus/Moscow/0453/09            | 2009 | Russia | Class II | XXI | XXI.1.1 |
| 451 | JF824065.1 | Avian_orthoavulavirus_1_isolate_Pi/Rus/Kursk/0485/09             | 2009 | Russia | Class II | XXI | XXI.1.1 |
| 452 | JF824066.1 | Avian_orthoavulavirus_1_isolate_Pi/Rus/Tula/0500/08              | 2008 | Russia | Class II | XXI | XXI.1.1 |
| 453 | JF824067.1 | Avian_orthoavulavirus_1_isolate_Pi/Rus/Tver/1600/08              | 2008 | Russia | Class II | XXI | XXI.1.1 |
| 454 | JF824068.1 | Avian_orthoavulavirus_1_isolate_Pi/Rus/Tver/1601/08              | 2008 | Russia | Class II | XXI | XXI.1.1 |
| 455 | JF827027.1 | Newcastle_disease_virus_isolate_Pi/Rus/Kemerovo/0267/09          | 2009 | Russia | Class II | XXI | XXI.1.1 |
| 456 | JN638234.1 | Newcastle_disease_virus_strain_NDV/DOVE/IT/11RS98_102VIR/2011    | 2011 | Italy  | Class II | XXI | XXI.2   |
| 457 | JN638235.1 | Newcastle_disease_virus_strain_NDV/DOVE/IT/11RS100_104VIR/2011   | 2011 | Italy  | Class II | XXI | XXI.2   |
| 458 | JN638236.1 | Newcastle_disease_virus_strain_NDV/DOVE/IT/10RS6171_7154VIR/2010 | 2010 | Italy  | Class II | XXI | XXI.2   |

|     |            |                                                                    |      |            |          |     |              |
|-----|------------|--------------------------------------------------------------------|------|------------|----------|-----|--------------|
| 459 | JN638237.1 | Newcastle_disease_virus_strain_NDV/DOVE/IT/10RS6431_RS7313VIR/2010 | 2010 | Italy      | Class II | VI  | VI.2.1.1.2.1 |
| 460 | JN806235.1 | Newcastle_disease_virus_strain_APMV-1/pigeon/Almaty/1063/05        | 2005 | Kazakhstan | Class II | XXI | XXI.1.1      |
| 461 | JN806236.1 | Newcastle_disease_virus_strain_APMV-1/pigeon/Almaty/1064/05        | 2005 | Kazakhstan | Class II | XXI | XXI.1.1      |
| 462 | JN806237.1 | Newcastle_disease_virus_strain_APMV-1/pigeon/Almaty/1065/05        | 2005 | Kazakhstan | Class II | XXI | XXI.1.1      |
| 463 | JN872160.1 | Pigeon_paramyxovirus_1_isolate_Pigeon/Minnesota/511296/07          | 2007 | USA        | Class II | VI  | VI.2.1.1.1   |
| 464 | JN872166.1 | Pigeon_paramyxovirus_1_isolate_Dove/Italy/VIR_24/2008              | 2008 | Italy      | Class II | VI  | VI.2.1.1.2.1 |
| 465 | JN872167.1 | Pigeon_paramyxovirus_1_isolate_Dove/FL/455682-2/2006               | 2006 | USA        | Class II | VI  | VI.2.1.1.1   |
| 466 | JN872170.1 | Pigeon_paramyxovirus_1_isolate_Pigeon/Texas/5254-12/2010           | 2010 | USA        | Class II | VI  | VI.2.1.1.1   |
| 467 | JN872172.1 | Pigeon_paramyxovirus_1_isolate_Raptor/Minnesota/18575-4/2009       | 2009 | USA        | Class II | VI  | VI.2.1.1.1   |
| 468 | JN872173.1 | Pigeon_paramyxovirus_1_isolate_Pigeon/New_York/44407/1984          | 1984 | USA        | Class II | VI  | VI.1         |
| 469 | JN872174.1 | Pigeon_paramyxovirus_1_isolate_New_Jersey/9564/2010                | 2010 | USA        | Class II | VI  | VI.2.1.1.1   |
| 470 | JN872175.1 | Pigeon_paramyxovirus_1_isolate_Pigeon/Minnesota/723/2009           | 2009 | USA        | Class II | VI  | VI.2.1.1.1   |
| 471 | JN872176.1 | Pigeon_paramyxovirus_1_isolate_Pheasant/Massachusetts/359425/2005  | 2005 | USA        | Class II | VI  | VI.2.1.1.1   |
| 472 | JN872178.1 | Pigeon_paramyxovirus_1_isolate_Pigeon/Louisiana/331309/2004        | 2004 | USA        | Class II | VI  | VI.2.1.1.1   |
| 473 | JN872179.1 | Pigeon_paramyxovirus_1_isolate_Pigeon/Nevada/241851/2003           | 2003 | USA        | Class II | VI  | VI.2.1.1.1   |
| 474 | JN872180.1 | Pigeon_paramyxovirus_1_isolate_Pigeon/Texas/209682/2002            | 2002 | USA        | Class II | VI  | VI.2.2.1     |
| 475 | JN872182.1 | Pigeon_paramyxovirus_1_isolate_Pigeon/New_York/12339/1998          | 1998 | USA        | Class II | VI  | VI.2.2.1     |
| 476 | JN872183.1 | Pigeon_paramyxovirus_1_isolate_Pigeon/Maryl/2075/1998              | 1998 | USA        | Class II | VI  | VI.2.1.1.1   |
| 477 | JN872184.1 | Pigeon_paramyxovirus_1_isolate_Pigeon/Wyoming/20210/1997           | 1997 | USA        | Class II | VI  | VI.2.2.1     |
| 478 | JN872185.1 | Pigeon_paramyxovirus_1_isolate_Pigeon/New_York/32851-2/1995        | 1995 | USA        | Class II | VI  | VI.2.2.1     |
| 479 | JN872186.1 | Pigeon_paramyxovirus_1_isolate_Pigeon/Indiana/18002/1991           | 1991 | USA        | Class II | VI  | VI.2.2.1     |
| 480 | JN872187.1 | Pigeon_paramyxovirus_1_isolate_Pigeon/Illinois/11748/1993          | 1993 | USA        | Class II | VI  | VI.2.2.1     |
| 481 | JN872188.1 | Pigeon_paramyxovirus_1_isolate_Pigeon/Minnesota/2446/1989          | 1989 | USA        | Class II | VI  | VI.2.2.1     |
| 482 | JN872190.1 | Pigeon_paramyxovirus_1_isolate_Pigeon/South_Dakota/486839/2007     | 2007 | USA        | Class II | VI  | VI.2.1.1.1   |
| 483 | JN941994.1 | Pigeon_paramyxovirus_1_isolate_Pigeon/Michigan/1924/2008           | 2008 | USA        | Class II | VI  | VI.2.1.1.1   |
| 484 | JN941995.1 | Pigeon_paramyxovirus_1_isolate_Pigeon/New_York/1989-19/2008        | 2008 | USA        | Class II | VI  | VI.2.1.1.2.1 |

|     |            |                                                                       |      |            |          |      |              |
|-----|------------|-----------------------------------------------------------------------|------|------------|----------|------|--------------|
| 485 | JN941996.1 | Pigeon_paramyxovirus_1_isolate_Pigeon/Pennsylvania/2062/2008          | 2008 | USA        | Class II | VI   | VI.2.1.1.1   |
| 486 | JN941997.1 | Pigeon_paramyxovirus_1_isolate_Pigeon/Florida/2181-43/2008            | 2008 | USA        | Class II | VI   | VI.2.1.1.2.1 |
| 487 | JN941998.1 | Pigeon_paramyxovirus_1_isolate_Pigeon/Pennsylvania/2282/2008          | 2008 | USA        | Class II | VI   | VI.2.1.1.1   |
| 488 | JN941999.1 | Pigeon_paramyxovirus_1_isolate_Pigeon/Minnesota/77/2008               | 2008 | USA        | Class II | VI   | VI.2.1.1.1   |
| 489 | JN942000.1 | Pigeon_paramyxovirus_1_isolate_Dove/Florida/1287/2008                 | 2008 | USA        | Class II | VI   | VI.2.1.1.1   |
| 490 | JN942095.1 | Pigeon_paramyxovirus_1_isolate_Pigeon/Oklahoma/7668/1997              | 1997 | USA        | Class II | VI   | VI.2.2.1     |
| 491 | JN942098.1 | Pigeon_paramyxovirus_1_isolate_Pigeon/North_Carolina/56404/2000       | 2000 | USA        | Class II | VI   | VI.2.2.1     |
| 492 | JN967786.1 | Pigeon_paramyxovirus_1_isolate_Pigeon/New_Jersey/58300-4/2000         | 2000 | USA        | Class II | VI   | VI.2.2.1     |
| 493 | JN967787.1 | Pigeon_paramyxovirus_1_isolate_Pigeon/Illinois/37397/1987             | 1987 | USA        | Class II | VI   | VI.1         |
| 494 | JN967788.1 | Pigeon_paramyxovirus_1_isolate_Pigeon/Maryl/11936/1985                | 1985 | USA        | Class II | VI   | VI.1         |
| 495 | JN986839.1 | Newcastle_disease_virus_strain_PPMV-1/pigeon/IE/806/04                | 2004 | Ireland    | Class II | VI   | VI.2.1.1.2.2 |
| 496 | JQ039385.1 | Newcastle_disease_virus_strain_dove/Nigeria/VRD07-163/2007            | 2007 | Nigeria    | Class II | XXI  | XXI.1.1      |
| 497 | JQ039387.1 | Newcastle_disease_virus_strain_pigeon/Nigeria/VRD08-37BRpe(7-9)/2008  | 2008 | Nigeria    | Class II | VI   | VI.2.1.2     |
| 498 | JQ039388.1 | Newcastle_disease_virus_strain_pigeon/Nigeria/VRD08-37(10-11-13)/2008 | 2008 | Nigeria    | Class II | VI   | VI.2.1.2     |
| 499 | JQ039389.1 | Newcastle_disease_virus_strain_pigeon/Nigeria/VRD07-369/2007          | 2007 | Nigeria    | Class II | XXI  | XXI.1.1      |
| 500 | JQ039391.1 | Newcastle_disease_virus_strain_pigeon/Nigeria/VRD07-231/2007          | 2007 | Nigeria    | Class II | VI   | VI.2.1.2     |
| 501 | JQ039395.1 | Newcastle_disease_virus_strain_pigeon/Nigeria/VRD07-173/2007          | 2007 | Nigeria    | Class II | XXI  | XXI.1.1      |
| 502 | JQ268609.1 | Newcastle_disease_virus_strain_Miangyang12505                         | 2011 | China      | Class II | VI   | VI.2.1.1.2.1 |
| 503 | JQ290284.1 | Pigeon_paramyxovirus_1_strain_P/Anhui/1/09                            | 2009 | China      | Class II | VI   | VI.2.2.2     |
| 504 | JQ779825.1 | Newcastle_disease_virus_isolate_08RS-491                              | 2008 | Italy      | Class II | VI   | VI.2.1.1.2.1 |
| 505 | JQ979176.1 | Newcastle_disease_virus_strain_pigeon/China/SDLC/2011                 | 2011 | China      | Class II | VI   | VI.2.1.1.2.2 |
| 506 | JQ993431.1 | Newcastle_disease_virus_strain_pigeon/China/SDS/2011                  | 2011 | China      | Class II | VI   | VI.2.1.1.2.2 |
| 507 | JX028551.1 | Newcastle_disease_virus_isolate_BD-C162/10                            | 2010 | Bangladesh | Class II | XIII | XIII.2.2     |
| 508 | JX028552.2 | Avian_orthoavulavirus_1_isolate_BD-P01/10                             | 2010 | Bangladesh | Class II | XXI  | XXI.1.2      |
| 509 | JX094510.1 | Newcastle_disease_virus_strain_sms12                                  | 2012 | China      | Class II | VI   | VI.2.1.1.2.1 |
| 510 | JX244789.1 | Newcastle_disease_virus_isolate_Pigeon/China/JM/11/00                 | 2000 | China      | Class II | VI   | VI.2.1.1.2.1 |

|     |            |                                                        |      |       |          |     |              |
|-----|------------|--------------------------------------------------------|------|-------|----------|-----|--------------|
| 511 | JX244790.1 | Newcastle_disease_virus_isolate_Pigeon/China/ZQ/17/00  | 2000 | China | Class II | VII | VII.1.1      |
| 512 | JX244791.1 | Newcastle_disease_virus_isolate_Pigeon/China/SD/54/06  | 2006 | China | Class II | VII | VII.1.1      |
| 513 | JX244792.1 | Newcastle_disease_virus_isolate_Pigeon/China/SD/55/06  | 2006 | China | Class II | I   | I.1.1        |
| 514 | JX244793.1 | Newcastle_disease_virus_isolate_Pigeon/China/93/08     | 2008 | China | Class II | II  | II           |
| 515 | JX244794.1 | Newcastle_disease_virus_isolate_Pigeon/China/100/08    | 2008 | China | Class II | VI  | VI.2.2.2     |
| 516 | JX244795.1 | Newcastle_disease_virus_isolate_Pigeon/China/101/08    | 2008 | China | Class II | II  | II           |
| 517 | JX244796.1 | Newcastle_disease_virus_isolate_Pigeon/China/102/08    | 2008 | China | Class II | II  | II           |
| 518 | JX244797.1 | Newcastle_disease_virus_isolate_Pigeon/China/103/08    | 2008 | China | Class II | II  | II           |
| 519 | JX244798.1 | Newcastle_disease_virus_isolate_Pigeon/China/104/08    | 2008 | China | Class II | VI  | VI.2.1.1.2.1 |
| 520 | JX244799.1 | Newcastle_disease_virus_isolate_Pigeon/China/105/08    | 2008 | China | Class II | VI  | VI.2.1.1.2.1 |
| 521 | JX244800.1 | Newcastle_disease_virus_isolate_Pigeon/China/106/08    | 2008 | China | Class II | VI  | VI.2.1.1.2.1 |
| 522 | JX244801.1 | Newcastle_disease_virus_isolate_Pigeon/China/107/08    | 2008 | China | Class II | VI  | VI.2.2.2     |
| 523 | JX244802.1 | Newcastle_disease_virus_isolate_Pigeon/China/109/08    | 2008 | China | Class II | II  | II           |
| 524 | JX244803.1 | Newcastle_disease_virus_isolate_Pigeon/China/110/08    | 2008 | China | Class II | VI  | VI.2.2.2     |
| 525 | JX244804.1 | Newcastle_disease_virus_isolate_Pigeon/China/111/08    | 2008 | China | Class II | II  | II           |
| 526 | JX244805.1 | Newcastle_disease_virus_isolate_Pigeon/China/112/08    | 2008 | China | Class II | VI  | VI.2.2.2     |
| 527 | JX244806.1 | Newcastle_disease_virus_isolate_Pigeon/China/113/08    | 2008 | China | Class II | VII | VII.1.1      |
| 528 | JX244807.1 | Newcastle_disease_virus_isolate_Pigeon/China/KP/114/08 | 2008 | China | Class II | II  | II           |
| 529 | JX486550.1 | Pigeon_paramyxovirus_1_strain_pi/CH/LGD/110208         | 2011 | China | Class II | VI  | VI.2.1.1.2.1 |
| 530 | JX486551.1 | Pigeon_paramyxovirus_1_strain_pi/CH/LJL/100605         | 2010 | China | Class II | VI  | VI.2.1.1.2.2 |
| 531 | JX486552.1 | Pigeon_paramyxovirus_1_strain_pi/CH/LLN/110713         | 2011 | China | Class II | VI  | VI.2.1.1.2.2 |
| 532 | JX486553.1 | Pigeon_paramyxovirus_1_strain_pi/CH/LHLJ/110813        | 2011 | China | Class II | VI  | VI.2.1.1.2.1 |
| 533 | JX486554.1 | Pigeon_paramyxovirus_1_strain_pi/CH/LHLJ/110822        | 2011 | China | Class II | VI  | VI.2.1.1.2.1 |
| 534 | JX486555.1 | Pigeon_paramyxovirus_1_strain_pi/CH/LGD/110945         | 2011 | China | Class II | VI  | VI.2.1.1.2.1 |
| 535 | JX486556.1 | Pigeon_paramyxovirus_1_strain_pi/CH/LGD/110947         | 2011 | China | Class II | VI  | VI.2.1.1.2.1 |
| 536 | JX486557.1 | Pigeon_paramyxovirus_1_strain_pi/CH/LJL/120404         | 2012 | China | Class II | VI  | VI.2.1.1.2.1 |



|     |            |                                                               |      |         |          |    |              |
|-----|------------|---------------------------------------------------------------|------|---------|----------|----|--------------|
| 537 | JX518532.1 | Pigeon_paramyxovirus_1                                        | 2012 | Kenya   | Class II | VI | VI.2.1.2     |
| 538 | JX844034.1 | Newcastle_disease_virus_strain_NDV/pigeon/Finl/6985/2008      | 2008 | Finland | Class II | I  | I.1.1        |
| 539 | JX844035.1 | Newcastle_disease_virus_strain_NDV/pigeon/Finl/17557/2008     | 2008 | Finland | Class II | I  | I.1.1        |
| 540 | JX844036.1 | Newcastle_disease_virus_strain_NDV/pigeon/Finl/15475/2009     | 2009 | Finland | Class II | VI | VI.2.1.1.2.1 |
| 541 | JX855039.1 | Newcastle_disease_virus_isolate_pigeon/China/Shaanxi/g3/2003  | 2003 | China   | Class II | II | II           |
| 542 | JX855040.1 | Newcastle_disease_virus_isolate_pigeon/China/Shaanxi/g10/2006 | 2006 | China   | Class II | XX | XX           |
| 543 | JX901109.1 | Pigeon_paramyxovirus_1_strain_PPMV-1/Belgium/98-238/1998      | 1998 | Belgium | Class II | VI | VI.2.1.1.2.1 |
| 544 | JX901111.1 | Pigeon_paramyxovirus_1_strain_PPMV-1/Belgium/98-321/1998      | 1998 | Belgium | Class II | VI | VI.2.1.1.2.1 |
| 545 | JX901119.1 | Pigeon_paramyxovirus_1_strain_PPMV-1/Belgium/05-01824/2005    | 2005 | Belgium | Class II | VI | VI.2.1.1.2.1 |
| 546 | JX901120.1 | Pigeon_paramyxovirus_1_strain_PPMV-1/Belgium/05-03936-8/2005  | 2005 | Belgium | Class II | VI | VI.2.1.1.2.1 |
| 547 | JX901121.1 | Pigeon_paramyxovirus_1_strain_PPMV-1/Belgium/07-04943/2007    | 2007 | Belgium | Class II | VI | VI.2.1.1.2.2 |
| 548 | JX901122.1 | Pigeon_paramyxovirus_1_strain_PPMV-1/Belgium/11-07574/2011    | 2011 | Belgium | Class II | VI | VI.2.1.1.2.2 |
| 549 | JX901123.1 | Pigeon_paramyxovirus_1_strain_PPMV-1/Belgium/11-08304/2011    | 2011 | Belgium | Class II | VI | VI.2.1.1.2.2 |
| 550 | JX901124.1 | Pigeon_paramyxovirus_1_strain_PPMV-1/Belgium/11-09620/2011    | 2011 | Belgium | Class II | VI | VI.2.1.1.2.2 |
| 551 | JX901312.1 | Newcastle_disease_virus_isolate_APMV1/Pigeon/USA/0101/2001    | 2001 | USA     | Class II | VI | VI.2.2.1     |
| 552 | JX901313.1 | Newcastle_disease_virus_isolate_APMV1/Pigeon/USA/0102/2001    | 2001 | USA     | Class II | VI | VI.2.1.1.1   |
| 553 | JX901314.1 | Newcastle_disease_virus_isolate_APMV1/Dove/USA/0103/2001      | 2001 | USA     | Class II | VI | VI.2.1.1.1   |
| 554 | JX901315.1 | Newcastle_disease_virus_isolate_APMV1/Pigeon/USA/0106/2001    | 2001 | USA     | Class II | VI | VI.2.1.1.1   |
| 555 | JX901317.1 | Newcastle_disease_virus_isolate_APMV1/Pigeon/USA/0201/2002    | 2002 | USA     | Class II | VI | VI.2.1.1.1   |
| 556 | JX901319.1 | Newcastle_disease_virus_isolate_APMV1/Pigeon/PA/USA/0501/2005 | 2005 | USA     | Class II | VI | VI.2.1.1.1   |
| 557 | JX901320.1 | Newcastle_disease_virus_isolate_APMV1/Pigeon/PA/USA/0502/2005 | 2005 | USA     | Class II | VI | VI.2.1.1.1   |
| 558 | JX901323.1 | Newcastle_disease_virus_isolate_APMV1/Pigeon/PA/USA/0601/2006 | 2006 | USA     | Class II | VI | VI.2.1.1.1   |
| 559 | JX901324.1 | Newcastle_disease_virus_isolate_APMV1/Pigeon/PA/USA/0602/2006 | 2006 | USA     | Class II | VI | VI.2.1.1.1   |
| 560 | JX901325.1 | Newcastle_disease_virus_isolate_APMV1/Pigeon/NY/USA/0603/2006 | 2006 | USA     | Class II | VI | VI.2.1.1.1   |
| 561 | JX901326.1 | Newcastle_disease_virus_isolate_APMV1/Pigeon/NJ/USA/0604/2006 | 2006 | USA     | Class II | VI | VI.2.1.1.1   |
| 562 | JX901327.1 | Newcastle_disease_virus_isolate_APMV1/Pigeon/PA/USA/0605/2006 | 2006 | USA     | Class II | VI | VI.2.1.1.1   |

|     |            |                                                                 |      |     |          |    |            |
|-----|------------|-----------------------------------------------------------------|------|-----|----------|----|------------|
| 563 | JX901328.1 | Newcastle_disease_virus_isolate_APMV1/Pigeon/NJ/USA/0607/2006   | 2006 | USA | Class II | VI | VI.2.1.1.1 |
| 564 | JX901329.1 | Newcastle_disease_virus_isolate_APMV1/Pigeon/PA/USA/0701/2007   | 2007 | USA | Class II | VI | VI.2.1.1.1 |
| 565 | JX901330.1 | Newcastle_disease_virus_isolate_APMV1/Pigeon/PA/USA/0702/2007   | 2007 | USA | Class II | VI | VI.2.1.1.1 |
| 566 | JX901331.1 | Newcastle_disease_virus_isolate_APMV1/Pigeon/PA/USA/0702.2/2007 | 2007 | USA | Class II | II | II         |
| 567 | JX901332.1 | Newcastle_disease_virus_isolate_APMV1/Pigeon/MO/USA/0703/2007   | 2007 | USA | Class II | VI | VI.2.1.1.1 |
| 568 | JX901333.1 | Newcastle_disease_virus_isolate_APMV1/Pigeon/PA/USA/0704/2007   | 2007 | USA | Class II | VI | VI.2.1.1.1 |
| 569 | JX901334.1 | Newcastle_disease_virus_isolate_APMV1/Pigeon/PA/USA/0705/2007   | 2007 | USA | Class II | VI | VI.2.1.1.1 |
| 570 | JX901335.1 | Newcastle_disease_virus_isolate_APMV1/Pigeon/PA/USA/0706/2007   | 2007 | USA | Class II | VI | VI.2.1.1.1 |
| 571 | JX901336.1 | Newcastle_disease_virus_isolate_APMV1/Pigeon/NC/USA/0707/2007   | 2007 | USA | Class II | VI | VI.2.1.1.1 |
| 572 | JX901337.1 | Newcastle_disease_virus_isolate_APMV1/Pigeon/CT/USA/0708/2007   | 2007 | USA | Class II | VI | VI.2.1.1.1 |
| 573 | JX901338.1 | Newcastle_disease_virus_isolate_APMV1/Pigeon/OH/USA/0709/2007   | 2007 | USA | Class II | VI | VI.2.1.1.1 |
| 574 | JX901339.1 | Newcastle_disease_virus_isolate_APMV1/Pigeon/NJ/USA/0710/2007   | 2007 | USA | Class II | VI | VI.2.1.1.1 |
| 575 | JX901340.1 | Newcastle_disease_virus_isolate_APMV1/Pigeon/PA/USA/0711/2007   | 2007 | USA | Class II | VI | VI.2.1.1.1 |
| 576 | JX901341.1 | Newcastle_disease_virus_isolate_APMV1/Pigeon/PA/USA/0712/2007   | 2007 | USA | Class II | VI | VI.2.2.1   |
| 577 | JX901342.1 | Newcastle_disease_virus_isolate_APMV1/Pigeon/MN/USA/0713/2007   | 2007 | USA | Class II | VI | VI.2.1.1.1 |
| 578 | JX901343.1 | Newcastle_disease_virus_isolate_APMV1/Pigeon/MN/USA/0713.2/2007 | 2007 | USA | Class II | II | II         |
| 579 | JX901344.1 | Newcastle_disease_virus_isolate_APMV1/Pigeon/ME/USA/0714/2007   | 2007 | USA | Class II | VI | VI.2.1.1.1 |
| 580 | JX901345.1 | Newcastle_disease_virus_isolate_APMV1/Pigeon/MD/USA/0715/2007   | 2007 | USA | Class II | II | II         |
| 581 | JX901346.1 | Newcastle_disease_virus_isolate_APMV1/Pigeon/PA/USA/0716/2007   | 2007 | USA | Class II | VI | VI.2.1.1.1 |
| 582 | JX901347.1 | Newcastle_disease_virus_isolate_APMV1/Pigeon/NY/USA/0717/2007   | 2007 | USA | Class II | VI | VI.2.1.1.1 |
| 583 | JX901348.1 | Newcastle_disease_virus_isolate_APMV1/Pigeon/PA/USA/0718/2007   | 2007 | USA | Class II | VI | VI.2.1.1.1 |
| 584 | JX901349.1 | Newcastle_disease_virus_isolate_APMV1/Pigeon/MD/USA/0719/2007   | 2007 | USA | Class II | VI | VI.2.1.1.1 |
| 585 | JX901350.1 | Newcastle_disease_virus_isolate_APMV1/Pigeon/PA/USA/0720/2007   | 2007 | USA | Class II | VI | VI.2.1.1.1 |
| 586 | JX901351.1 | Newcastle_disease_virus_isolate_APMV1/Pigeon/NJ/USA/0721/2007   | 2007 | USA | Class II | VI | VI.2.1.1.1 |
| 587 | JX901352.1 | Newcastle_disease_virus_isolate_APMV1/Pigeon/PA/USA/0723/2007   | 2007 | USA | Class II | VI | VI.2.1.1.1 |
| 588 | JX901353.1 | Newcastle_disease_virus_isolate_APMV1/Pigeon/PA/USA/0724/2007   | 2007 | USA | Class II | VI | VI.2.1.1.1 |

|     |            |                                                               |      |       |          |    |              |
|-----|------------|---------------------------------------------------------------|------|-------|----------|----|--------------|
| 589 | JX901354.1 | Newcastle_disease_virus_isolate_APMV1/Pigeon/PA/USA/0725/2007 | 2007 | USA   | Class II | VI | VI.2.1.1.1   |
| 590 | JX901355.1 | Newcastle_disease_virus_isolate_APMV1/Pigeon/PA/USA/0726/2007 | 2007 | USA   | Class II | VI | VI.2.1.1.1   |
| 591 | JX901356.1 | Newcastle_disease_virus_isolate_APMV1/Pigeon/PA/USA/0727/2007 | 2007 | USA   | Class II | VI | VI.2.1.1.1   |
| 592 | JX901357.1 | Newcastle_disease_virus_isolate_APMV1/Pigeon/PA/USA/0728/2007 | 2007 | USA   | Class II | VI | VI.2.1.1.1   |
| 593 | JX901358.1 | Newcastle_disease_virus_isolate_APMV1/Pigeon/PA/USA/0801/2008 | 2008 | USA   | Class II | VI | VI.2.1.1.1   |
| 594 | JX901359.1 | Newcastle_disease_virus_isolate_APMV1/Pigeon/PA/USA/0802/2008 | 2008 | USA   | Class II | VI | VI.2.1.1.1   |
| 595 | JX901360.1 | Newcastle_disease_virus_isolate_APMV1/Pigeon/PA/USA/0803/2008 | 2008 | USA   | Class II | VI | VI.2.1.1.1   |
| 596 | JX901361.1 | Newcastle_disease_virus_isolate_APMV1/Pigeon/PA/USA/0804/2008 | 2008 | USA   | Class II | VI | VI.2.1.1.1   |
| 597 | JX901362.1 | Newcastle_disease_virus_isolate_APMV1/Pigeon/PA/USA/0805/2008 | 2008 | USA   | Class II | VI | VI.2.1.1.1   |
| 598 | JX901363.1 | Newcastle_disease_virus_isolate_APMV1/Pigeon/PA/USA/0806/2008 | 2008 | USA   | Class II | VI | VI.2.1.1.1   |
| 599 | JX901364.1 | Newcastle_disease_virus_isolate_APMV1/Pigeon/PA/USA/0807/2008 | 2008 | USA   | Class II | VI | VI.2.1.1.1   |
| 600 | JX901365.1 | Newcastle_disease_virus_isolate_APMV1/Pigeon/PA/USA/0808/2008 | 2008 | USA   | Class II | VI | VI.2.1.1.1   |
| 601 | JX901366.1 | Newcastle_disease_virus_isolate_APMV1/Pigeon/PA/USA/0809/2008 | 2008 | USA   | Class II | VI | VI.2.1.1.1   |
| 602 | JX901367.1 | Newcastle_disease_virus_isolate_APMV1/Pigeon/PA/USA/0810/2008 | 2008 | USA   | Class II | VI | VI.2.1.1.1   |
| 603 | JX901368.1 | Newcastle_disease_virus_isolate_APMV1/Pigeon/PA/USA/0811/2008 | 2008 | USA   | Class II | VI | VI.2.1.1.1   |
| 604 | JX901369.1 | Newcastle_disease_virus_isolate_APMV1/Pigeon/NJ/USA/0812/2008 | 2008 | USA   | Class II | VI | VI.2.1.1.1   |
| 605 | JX901373.1 | Newcastle_disease_virus_isolate_APMV1/Pigeon/PA/USA/0902/2009 | 2009 | USA   | Class II | VI | VI.2.1.1.1   |
| 606 | JX901374.1 | Newcastle_disease_virus_isolate_APMV1/Pigeon/OH/USA/0903/2009 | 2009 | USA   | Class II | VI | VI.2.1.1.1   |
| 607 | JX901375.1 | Newcastle_disease_virus_isolate_APMV1/Pigeon/PA/USA/0904/2009 | 2009 | USA   | Class II | VI | VI.2.1.1.1   |
| 608 | JX901376.1 | Newcastle_disease_virus_isolate_APMV1/Pigeon/PA/USA/0905/2009 | 2009 | USA   | Class II | VI | VI.2.1.1.1   |
| 609 | JX901377.1 | Newcastle_disease_virus_isolate_APMV1/Pigeon/PA/USA/0906/2009 | 2009 | USA   | Class II | VI | VI.2.1.1.1   |
| 610 | KC143154.1 | Newcastle_disease_virus_isolate_Ch98-1                        | 1998 | China | Class II | VI | VI.2.2.2     |
| 611 | KC143156.1 | Newcastle_disease_virus_isolate_NDV00-044                     | 2000 | China | Class II | VI | VI.2.2.2     |
| 612 | KC143157.1 | Newcastle_disease_virus_isolate_NDV02-044                     | 2002 | China | Class II | VI | VI.2.2.2     |
| 613 | KC143158.1 | Newcastle_disease_virus_isolate_NDV03-051                     | 2003 | China | Class II | VI | VI.2.2.2     |
| 614 | KC143159.1 | Newcastle_disease_virus_isolate_NDV05-027                     | 2005 | China | Class II | VI | VI.2.1.1.2.1 |

|     |            |                                                                          |      |           |          |      |              |
|-----|------------|--------------------------------------------------------------------------|------|-----------|----------|------|--------------|
| 615 | KC143160.1 | Newcastle_disease_virus_isolate_NDV05-028                                | 2005 | China     | Class II | VI   | VI.2.2.2     |
| 616 | KC143161.1 | Newcastle_disease_virus_isolate_NDV05-029                                | 2005 | China     | Class II | VI   | VI.2.2.2     |
| 617 | KC143164.1 | Newcastle_disease_virus_isolate_SH215                                    | 2011 | China     | Class II | VI   | VI.2.1.1.2.2 |
| 618 | KC424430.1 | Newcastle_disease_virus_isolate_spotted_dove/China/08                    | 2008 | China     | Class II | IX   | IX           |
| 619 | KC568204.1 | Avian_orthoavulavirus_1_isolate_pigeon/Nigeria/ZM/KN/PG01/N1/688/2009    | 2009 | Nigeria   | Class II | XVII | XVII         |
| 620 | KC568210.1 | Newcastle_disease_virus_isolate_NG-689/KT.MSH.15C                        | 2009 | Nigeria   | Class II | XIV  | XIV.2        |
| 621 | KC568228.1 | Newcastle_disease_virus_isolate_NG-713/YB.GSH1.4-6T                      | 2009 | Nigeria   | Class II | XIV  | XIV.2        |
| 622 | KC915205.1 | Pigeon_paramyxovirus_1_strain_NDV/pigeon/Macedonia/234/2007              | 2007 | Macedonia | Class II | VI   | VI.2.1.1.2.2 |
| 623 | KC915206.1 | Pigeon_paramyxovirus_1_strain_NDV/pigeon/Macedonia/1501/2007             | 2007 | Macedonia | Class II | VI   | VI.2.1.1.2.2 |
| 624 | KC915207.1 | Pigeon_paramyxovirus_1_strain_NDV/pigeon/Macedonia/1503/2007             | 2007 | Macedonia | Class II | VI   | VI.2.1.1.2.2 |
| 625 | KC915208.1 | Pigeon_paramyxovirus_1_strain_NDV/pigeon/Macedonia/230/2008              | 2008 | Macedonia | Class II | VI   | VI.2.1.1.2.2 |
| 626 | KC915209.1 | Pigeon_paramyxovirus_1_strain_NDV/pigeon/Macedonia/232/2008              | 2008 | Macedonia | Class II | VI   | VI.2.1.1.2.2 |
| 627 | KC915210.1 | Pigeon_paramyxovirus_1_strain_NDV/pigeon/Macedonia/962/2008              | 2008 | Macedonia | Class II | VI   | VI.2.1.1.2.2 |
| 628 | KC915212.1 | Pigeon_paramyxovirus_1_strain_NDV/pigeon/Macedonia/2810/2010             | 2010 | Macedonia | Class II | VI   | VI.2.1.1.2.2 |
| 629 | KC915213.1 | Pigeon_paramyxovirus_1_strain_NDV/pigeon/Macedonia/233/2011              | 2011 | Macedonia | Class II | VI   | VI.2.1.1.2.2 |
| 630 | KC915214.1 | Pigeon_paramyxovirus_1_strain_NDV/pigeon/Macedonia/415/2011              | 2011 | Macedonia | Class II | VI   | VI.2.1.1.2.2 |
| 631 | KC915215.1 | Pigeon_paramyxovirus_1_strain_NDV/pigeon/Macedonia/419/2011              | 2011 | Macedonia | Class II | VI   | VI.2.1.1.2.2 |
| 632 | KC915216.1 | Pigeon_paramyxovirus_1_strain_NDV/feral_pigeon/Macedonia/9701/2012       | 2012 | Macedonia | Class II | VI   | VI.2.1.1.2.2 |
| 633 | KC934170.1 | Newcastle_disease_virus_strain_SpottedDove/China/08                      | 2008 | China     | Class II | IX   | IX           |
| 634 | KF828884.1 | Newcastle_disease_virus_isolate_BJP13                                    | 2013 | China     | Class II | VI   | VI.2.1.1.2.2 |
| 635 | KF944359.1 | Newcastle_disease_virus_strain_pigeon/IS/854/2013                        | 2013 | Israel    | Class II | VI   | VI.2.1.2     |
| 636 | KJ136261.1 | Newcastle_disease_virus_isolate_JLDH_2013                                | 2013 | China     | Class II | VII  | VII.1.1      |
| 637 | KJ473708.1 | Pigeon_paramyxovirus_1_strain_Eurasian_collared_dove/Arizona/145909/2009 | 2009 | USA       | Class II | VI   | VI.2.1.1.1   |
| 638 | KJ473709.1 | Pigeon_paramyxovirus_1_strain_Eurasian_collared_dove/Montana/146350/2009 | 2009 | USA       | Class II | VI   | VI.2.1.1.1   |
| 639 | KJ473710.1 | Pigeon_paramyxovirus_1_strain_Eurasian_collared_dove/Montana/146820/2010 | 2010 | USA       | Class II | VI   | VI.2.1.1.1   |
| 640 | KJ525672.1 | Newcastle_disease_virus_isolate_Pi/SD/JN/2010                            | 2010 | China     | Class II | VI   | VI.2.1.1.2.1 |

|     |            |                                                                            |      |         |          |     |              |
|-----|------------|----------------------------------------------------------------------------|------|---------|----------|-----|--------------|
| 641 | KJ525673.1 | Newcastle_disease_virus_isolate_Pi/SD/JN/2011                              | 2011 | China   | Class II | VI  | VI.2.1.1.2.1 |
| 642 | KJ525674.1 | Newcastle_disease_virus_isolate_Pi/SX/P1/2013                              | 2013 | China   | Class II | VI  | VI.2.1.1.2.1 |
| 643 | KJ525675.1 | Newcastle_disease_virus_isolate_Pi/SX/P2/2013                              | 2013 | China   | Class II | VI  | VI.2.1.1.2.1 |
| 644 | KJ600777.1 | Newcastle_disease_virus_isolate_Pi/China/SD/2012/132                       | 2012 | China   | Class II | VI  | VI.2.1.1.2.1 |
| 645 | KJ600778.1 | Newcastle_disease_virus_isolate_Pi/China/SH/2013/163                       | 2013 | China   | Class II | VI  | VI.2.1.1.2.2 |
| 646 | KJ600779.1 | Newcastle_disease_virus_isolate_Pi/China/SH/2013/167                       | 2013 | China   | Class II | VI  | VI.2.1.1.2.2 |
| 647 | KJ600780.1 | Newcastle_disease_virus_isolate_Pi/China/SH/2013/168                       | 2013 | China   | Class II | VI  | VI.2.1.1.2.2 |
| 648 | KJ607163.1 | Pigeon_paramyxovirus_1_strain_pi/CH/LJS/1/04                               | 2004 | China   | Class II | VI  | VI.2.2.2     |
| 649 | KJ607164.1 | Pigeon_paramyxovirus_1_strain_pi/CH/LJS/1/03                               | 2003 | China   | Class II | VI  | VI.2.2.2     |
| 650 | KJ607165.1 | Pigeon_paramyxovirus_1_strain_pi/CH/LHLJ/131237                            | 2013 | China   | Class II | VI  | VI.2.1.1.2.2 |
| 651 | KJ607166.1 | Pigeon_paramyxovirus_1_strain_pi/CH/LHLJ/131011                            | 2013 | China   | Class II | VI  | VI.2.1.1.2.2 |
| 652 | KJ736742.1 | Newcastle_disease_virus_isolate_R75/98                                     | 1998 | Germany | Class II | VI  | VI.2.1.1.1   |
| 653 | KJ782376.1 | Pigeon_paramyxovirus_1_strain_pi/CH/NM/0707/2011                           | 2011 | China   | Class II | VI  | VI.2.1.1.2.2 |
| 654 | KJ808819.1 | Newcastle_disease_virus_isolate_Pigeon/China/BJ2013                        | 2013 | China   | Class II | VI  | VI.2.1.1.2.2 |
| 655 | KJ808820.1 | Newcastle_disease_virus_isolate_Pigeon/China/SD2012                        | 2012 | China   | Class II | VI  | VI.2.2.2     |
| 656 | KJ914671.1 | Avian_orthoavulavirus_1_isolate_pigeon/Ukraine/Dnipropetrovsk/1-18-11/2011 | 2011 | Ukraine | Class II | XXI | XXI.1.1      |
| 657 | KJ914672.1 | Avian_orthoavulavirus_1_isolate_pigeon/Ukraine/Ukromne/3-26-11/2011        | 2011 | Ukraine | Class II | XXI | XXI.1.1      |
| 658 | KJ920204.1 | Newcastle_disease_virus_isolate_NDV/Altai/pigeon/770/2011                  | 2011 | Russia  | Class II | XXI | XXI.1.1      |
| 659 | KM374056.1 | Newcastle_disease_virus_strain_pigeon/Yunnan/1111/2013                     | 2013 | China   | Class II | VI  | VI.2.1.1.2.2 |
| 660 | KM374057.1 | Newcastle_disease_virus_strain_pigeon/Anhui/2365/2012                      | 2012 | China   | Class II | VI  | VI.2.1.1.2.2 |
| 661 | KM374058.1 | Newcastle_disease_virus_strain_pigeon/Anhui/2369/2012                      | 2012 | China   | Class II | VI  | VI.2.1.1.2.2 |
| 662 | KM374059.1 | Newcastle_disease_virus_strain_pigeon/Guangxi/1015/2013                    | 2013 | China   | Class II | VI  | VI.2.1.1.2.1 |
| 663 | KM374060.1 | Newcastle_disease_virus_strain_pigeon/Shanghai/215/2011                    | 2011 | China   | Class II | VI  | VI.2.1.1.2.2 |
| 664 | KM374061.1 | Newcastle_disease_virus_strain_pigeon/Zhejiang/2036/2012                   | 2012 | China   | Class II | VI  | VI.2.1.1.2.2 |
| 665 | KM669999.1 | Newcastle_disease_virus_strain_SD02/14                                     | 2014 | China   | Class II | VI  | VI.2.1.1.2.2 |
| 666 | KP780870.1 | Avian_orthoavulavirus_1_isolate_ND0002270                                  | 2013 | USA     | Class II | VI  | VI.2.1.1.1   |

|     |            |                                                                                     |      |          |          |     |              |
|-----|------------|-------------------------------------------------------------------------------------|------|----------|----------|-----|--------------|
| 667 | KP780871.1 | Avian_orthoavulavirus_1_isolate_ND0007190                                           | 2013 | USA      | Class II | VI  | VI.2.1.1.1   |
| 668 | KP780872.1 | Avian_orthoavulavirus_1_isolate_ND0007186                                           | 2013 | USA      | Class II | VI  | VI.2.1.1.1   |
| 669 | KP780873.1 | Avian_orthoavulavirus_1_isolate_ND0007187                                           | 2013 | USA      | Class II | VI  | VI.2.1.1.1   |
| 670 | KP780874.2 | Avian_orthoavulavirus_1_isolate_ROPI/USA/Allegheny/PA/ND0007199/840/2013            | 2013 | USA      | Class II | VI  | VI.2.1.1.1   |
| 671 | KP780875.1 | Avian_orthoavulavirus_1_isolate_ND0003553                                           | 2013 | USA      | Class II | VI  | VI.2.1.1.1   |
| 672 | KP780876.1 | Avian_orthoavulavirus_1_isolate_ND0003558                                           | 2013 | USA      | Class II | VI  | VI.2.1.1.1   |
| 673 | KP861633.1 | Newcastle_disease_virus_isolate_Pigeon/China/SD069/2012                             | 2012 | China    | Class II | VI  | VI.2.1.1.2.2 |
| 674 | KR014202.1 | Avian_orthoavulavirus_1_isolate_APMV-1/Pigeon/Ethiopia/14VIR4296-2/2773/14/2/2014   | 2014 | Ethiopia | Class II | VI  | VI.2.1.2     |
| 675 | KR014203.1 | Avian_orthoavulavirus_1_isolate_APMV-1/Pigeon/Ethiopia/14VIR4296-4/2773/14/4/2014   | 2014 | Ethiopia | Class II | VI  | VI.2.1.2     |
| 676 | KR014204.1 | Avian_orthoavulavirus_1_isolate_APMV-1/Pigeon/Ethiopia/14VIR4296-6/2773/14/6/2014   | 2014 | Ethiopia | Class II | VI  | VI.2.1.2     |
| 677 | KR014205.1 | Avian_orthoavulavirus_1_isolate_APMV-1/Pigeon/Ethiopia/14VIR4296-10/2773/14/10/2014 | 2014 | Ethiopia | Class II | VI  | VI.2.1.2     |
| 678 | KR082484.1 | Newcastle_disease_virus_strain_NDV/pigeon/Desouk/Egypt/MS3I/2014                    | 2014 | Egypt    | Class II | XXI | XXI.1.1      |
| 679 | KR082486.1 | Newcastle_disease_virus_strain_NDV/Dove/Bassioun/Egypt/MS2/2014                     | 2014 | Egypt    | Class II | VII | VII.1.1      |
| 680 | KT006286.1 | Newcastle_disease_virus_strain_NDV/dove/Desouk/Egypt/MS5/2015                       | 2015 | Egypt    | Class II | VII | VII.1.1      |
| 681 | KT163261.1 | Avian_orthoavulavirus_1_isolate_Pi/SH/CH/0163/2012                                  | 2012 | China    | Class II | VI  | VI.2.1.1.2.2 |
| 682 | KT163262.1 | Avian_orthoavulavirus_1_isolate_Pi/SH/CH/0167/2013                                  | 2013 | China    | Class II | VI  | VI.2.1.1.2.2 |
| 683 | KT163263.1 | Avian_orthoavulavirus_1_isolate_Pi/SH/CH/0168/2013                                  | 2013 | China    | Class II | VI  | VI.2.1.1.2.2 |
| 684 | KT163264.1 | Avian_orthoavulavirus_1_isolate_Pi/SD/CH/0132/2012                                  | 2012 | China    | Class II | VI  | VI.2.1.1.2.1 |
| 685 | KT223818.1 | Avian_orthoavulavirus_1_isolate_NDV/pigeon/China/Qinghai-01/2014                    | 2014 | China    | Class I  | 1   | 1.1.2        |
| 686 | KT223819.1 | Avian_orthoavulavirus_1_isolate_NDV/pigeon/China/Qinghai-02/2014                    | 2014 | China    | Class I  | 1   | 1.1.2        |
| 687 | KT343662.1 | Newcastle_disease_virus_isolate_NDPR2                                               | 2012 | Iran     | Class II | XXI | XXI.1.1      |
| 688 | KT343663.1 | Newcastle_disease_virus_isolate_NDP14                                               | 2012 | Iran     | Class II | XXI | XXI.1.1      |
| 689 | KT343664.1 | Newcastle_disease_virus_isolate_NDP11                                               | 2012 | Iran     | Class II | XXI | XXI.1.1      |
| 690 | KT343665.1 | Newcastle_disease_virus_isolate_NDP17                                               | 2012 | Iran     | Class II | XXI | XXI.1.1      |
| 691 | KT343666.1 | Newcastle_disease_virus_isolate_NDP19                                               | 2012 | Iran     | Class II | VI  | VI.2.1.1.2.2 |
| 692 | KT343667.1 | Newcastle_disease_virus_isolate_NDP20                                               | 2012 | Iran     | Class II | I   | I.1.1        |

|     |            |                                                                 |      |            |          |     |              |
|-----|------------|-----------------------------------------------------------------|------|------------|----------|-----|--------------|
| 693 | KT343668.1 | Newcastle_disease_virus_isolate_NDP21                           | 2012 | Iran       | Class II | VI  | VI.2.2.2     |
| 694 | KT343669.1 | Newcastle_disease_virus_isolate_NDP22                           | 2012 | Iran       | Class II | VI  | VI.2.2.2     |
| 695 | KT343670.1 | Newcastle_disease_virus_isolate_NDP25                           | 2012 | Iran       | Class II | XXI | XXI.1.1      |
| 696 | KT343671.1 | Newcastle_disease_virus_isolate_NDP27                           | 2012 | Iran       | Class II | XXI | XXI.1.1      |
| 697 | KT343672.1 | Newcastle_disease_virus_isolate_NDP61                           | 2012 | Iran       | Class II | XXI | XXI.1.1      |
| 698 | KT343673.1 | Newcastle_disease_virus_isolate_NDP64                           | 2012 | Iran       | Class II | XXI | XXI.1.1      |
| 699 | KT343674.1 | Newcastle_disease_virus_isolate_NDP79                           | 2012 | Iran       | Class II | XXI | XXI.1.1      |
| 700 | KT343675.1 | Newcastle_disease_virus_isolate_NDP83                           | 2012 | Iran       | Class II | XXI | XXI.1.1      |
| 701 | KT343676.1 | Newcastle_disease_virus_isolate_NDP92                           | 2012 | Iran       | Class II | XXI | XXI.1.1      |
| 702 | KT343677.1 | Newcastle_disease_virus_isolate_NDP93                           | 2012 | Iran       | Class II | XXI | XXI.1.1      |
| 703 | KT343678.1 | Newcastle_disease_virus_isolate_NDP95                           | 2012 | Iran       | Class II | XXI | XXI.1.1      |
| 704 | KT381587.1 | Avian_orthoavulavirus_1_isolate_Pigeon/Guangdong/YF1/2014       | 2014 | China      | Class I  | 1   | 1.1.2        |
| 705 | KT381592.1 | Avian_orthoavulavirus_1_isolate_Pigeon/Guangdong/GZ293/2014     | 2014 | China      | Class II | VI  | VI.2.1.1.2.2 |
| 706 | KT381595.1 | Avian_orthoavulavirus_1_isolate_Pigeon/Guangdong/GM1/2014       | 2014 | China      | Class II | VI  | VI.2.1.1.2.1 |
| 707 | KT381596.1 | Avian_orthoavulavirus_1_isolate_Pigeon/Guangdong/GM8/2013       | 2013 | China      | Class II | VI  | VI.2.2.2     |
| 708 | KT381601.1 | Avian_orthoavulavirus_1_isolate_Pigeon/Guangdong/GZ287/2013     | 2013 | China      | Class II | VI  | VI.2.1.1.2.2 |
| 709 | KT381602.1 | Avian_orthoavulavirus_1_isolate_Pigeon/Guangdong/GZ288/2013     | 2013 | China      | Class II | VI  | VI.2.1.1.2.2 |
| 710 | KT381603.1 | Avian_orthoavulavirus_1_isolate_Pigeon/Guangdong/GZ290/2013     | 2013 | China      | Class II | VI  | VI.2.1.1.2.2 |
| 711 | KT381604.1 | Avian_orthoavulavirus_1_isolate_Pigeon/Guangdong/GZ292/2014     | 2014 | China      | Class II | VI  | VI.2.1.1.2.2 |
| 712 | KT381606.1 | Avian_orthoavulavirus_1_isolate_Pigeon/Guangdong/GZ289/2014     | 2014 | China      | Class II | VI  | VI.2.1.1.2.1 |
| 713 | KT962979.1 | Avian_orthoavulavirus_1_isolate_Altai/pigeon/777/2010           | 2010 | Russia     | Class II | XXI | XXI.1.1      |
| 714 | KT965727.1 | Avian_orthoavulavirus_1_isolate_columbalivia/KZ/EKO/15/2014     | 2014 | Kazakhstan | Class II | XXI | XXI.1.1      |
| 715 | KT965728.1 | Avian_orthoavulavirus_1_isolate_columbalivia/KZ/Zhambyl/32/2014 | 2014 | Zhambyl    | Class II | XXI | XXI.1.1      |
| 716 | KT965732.1 | Avian_orthoavulavirus_1_isolate_columbalivia/KZ/Zhambyl/27/2014 | 2014 | Zhambyl    | Class II | XXI | XXI.1.1      |
| 717 | KU133355.1 | Avian_orthoavulavirus_1_isolate_pigeon/Bulgaria/Govedartzi/2002 | 2002 | Bulgaria   | Class II | II  | II           |
| 718 | KU133357.1 | Avian_orthoavulavirus_1_isolate_Rock_pigeon/Brazil/8705/2009    | 2009 | Brazil     | Class II | II  | II           |

|     |            |                                                                              |      |         |          |     |              |
|-----|------------|------------------------------------------------------------------------------|------|---------|----------|-----|--------------|
| 719 | KU133358.1 | Avian_orthoavulavirus_1_isolate_Rock_pigeon/Brazil/UFRGS/2009                | 2009 | Brazil  | Class II | II  | II           |
| 720 | KU133359.1 | Avian_orthoavulavirus_1_isolate_Rock_pigeon/Brazil/S67A/2009                 | 2009 | Brazil  | Class II | II  | II           |
| 721 | KU133363.1 | Avian_orthoavulavirus_1_isolate_pigeon/Ukraine/Pigeon/Dnipropetrovsk/07/2007 | 2007 | Ukraine | Class II | II  | II           |
| 722 | KU133364.1 | Avian_orthoavulavirus_1_isolate_pigeon/Ukraine/Kharkiv/1/2007                | 2007 | Ukraine | Class II | II  | II           |
| 723 | KU133365.1 | Avian_orthoavulavirus_1_isolate_pigeon/Ukraine/Kharkiv/2/2007                | 2007 | Ukraine | Class II | II  | II           |
| 724 | KU159667.1 | Avian_orthoavulavirus_1_isolate_rock_pigeon/USA/GA/1/2012                    | 2012 | USA     | Class II | II  | II           |
| 725 | KU159668.1 | Avian_orthoavulavirus_1_isolate_rock_pigeon/USA/GA/2/2012                    | 2012 | USA     | Class II | II  | II           |
| 726 | KU159669.1 | Avian_orthoavulavirus_1_isolate_rock_pigeon/USA/GA/3/2012                    | 2012 | USA     | Class II | II  | II           |
| 727 | KU159670.1 | Avian_orthoavulavirus_1_isolate_rock_pigeon/USA/GA/4/2012                    | 2012 | USA     | Class II | II  | II           |
| 728 | KU159671.1 | Avian_orthoavulavirus_1_isolate_rock_pigeon/USA/GA/5/2012                    | 2012 | USA     | Class II | II  | II           |
| 729 | KU159672.1 | Avian_orthoavulavirus_1_isolate_rock_pigeon/USA/GA/6/2012                    | 2012 | USA     | Class II | II  | II           |
| 730 | KU159673.1 | Avian_orthoavulavirus_1_isolate_rock_pigeon/USA/GA/7/2012                    | 2012 | USA     | Class II | II  | II           |
| 731 | KU159674.1 | Avian_orthoavulavirus_1_isolate_rock_pigeon/USA/GA/8/2012                    | 2012 | USA     | Class II | II  | II           |
| 732 | KU159675.1 | Avian_orthoavulavirus_1_isolate_rock_pigeon/USA/GA/9/2012                    | 2012 | USA     | Class II | II  | II           |
| 733 | KU200240.1 | Avian_orthoavulavirus_1_strain_Pigeon/China/Heilongjiang/YA05/2014           | 2014 | China   | Class II | II  | II           |
| 734 | KU200241.1 | Avian_orthoavulavirus_1_strain_Pigeon/China/Jilin/YJ02/2015                  | 2015 | China   | Class II | II  | II           |
| 735 | KU200247.1 | Avian_orthoavulavirus_1_strain_Pigeon/China/Heilongjiang/TL03/2015           | 2015 | China   | Class II | VII | VII.1.1      |
| 736 | KU200248.1 | Avian_orthoavulavirus_1_strain_Pigeon/China/Heilongjiang/LS03/2014           | 2014 | China   | Class II | VII | VII.1.1      |
| 737 | KU200964.1 | Pigeon_paramyxovirus_1_isolate_Pigeon/China/GD130/2014                       | 2014 | China   | Class II | VI  | VI.2.1.1.2.2 |
| 738 | KU200965.1 | Pigeon_paramyxovirus_1_isolate_Pigeon/China/GD123/2010                       | 2010 | China   | Class II | VI  | VI.2.1.1.2.2 |
| 739 | KU200966.1 | Pigeon_paramyxovirus_1_isolate_Pigeon/China/GD128/2012                       | 2012 | China   | Class II | VI  | VI.2.1.1.2.2 |
| 740 | KU377528.1 | Pigeon_paramyxovirus_1_isolate_00VIR4400/turtledove/Italy/2000               | 2000 | Italy   | Class II | VI  | VI.1         |
| 741 | KU377529.1 | Pigeon_paramyxovirus_1_isolate_02VIR1875/turtledove/Italy/2002               | 2002 | Italy   | Class II | VI  | VI.2.1.1.2.1 |
| 742 | KU377530.1 | Pigeon_paramyxovirus_1_isolate_04VIR434/turtledove/Italy/2004                | 2004 | Italy   | Class II | VI  | VI.2.1.1.2.1 |
| 743 | KU377531.1 | Pigeon_paramyxovirus_1_isolate_06VIR463-2/pigeon/Italy/2006                  | 2006 | Italy   | Class II | VI  | VI.1         |
| 744 | KU377532.1 | Pigeon_paramyxovirus_1_isolate_08VIR24/turtledove/Italy/2008                 | 2008 | Italy   | Class II | VI  | VI.2.1.1.2.1 |



|     |            |                                                                          |      |          |          |       |              |
|-----|------------|--------------------------------------------------------------------------|------|----------|----------|-------|--------------|
| 745 | KU377533.1 | Pigeon_paramyxovirus_1_isolate_10VIR7155/turtledove/Italy/2010           | 2010 | Italy    | Class II | XXI   | XXI.2        |
| 746 | KU377534.1 | Pigeon_paramyxovirus_1_isolate_11VIR5795/pigeon/Italy/2011               | 2011 | Italy    | Class II | XXI   | XXI.1.2      |
| 747 | KU377535.1 | Pigeon_paramyxovirus_1_isolate_12VIR1876-1/turtledove/Italy/2012         | 2012 | Italy    | Class II | XXI   | XXI.2        |
| 748 | KU377536.1 | Pigeon_paramyxovirus_1_isolate_12VIR604/turtledove/Italy/2012            | 2012 | Italy    | Class II | XXI   | XXI.2        |
| 749 | KU377537.1 | Pigeon_paramyxovirus_1_isolate_14VIR8258-2/pigeon/Italy/2014             | 2014 | Italy    | Class II | VI    | VI.2.1.1.2.1 |
| 750 | KU522142.1 | Pigeon_paramyxovirus_1_isolate_pigeon/Egypt/VRLCU/2014                   | 2014 | Egypt    | Class II | VI    | VI.2.1.1.2.2 |
| 751 | KU527558.1 | Avian_orthoavulavirus_1_strain_Pigeon/China/Jilin/DA08/2015              | 2015 | China    | Class II | II    | II           |
| 752 | KU527559.1 | Avian_orthoavulavirus_1_strain_Pigeon/China/Jilin/DH09/2015              | 2015 | China    | Class II | VI    | VI.2.1.1.2.2 |
| 753 | KU527560.1 | Avian_orthoavulavirus_1_strain_Pigeon/China/Jilin/NG05/2015              | 2015 | China    | Class II | VI    | VI.2.1.1.2.2 |
| 754 | KU644586.1 | Avian_orthoavulavirus_1_isolate_Pi/MZS1-UVAS/2014                        | 2014 | Pakistan | Class II | XX    | XX           |
| 755 | KU710277.1 | Avian_orthoavulavirus_1_isolate_pigeon/Ukraine/Simferopol/2-26-11/2011   | 2011 | Ukraine  | Class II | VII   | VII.1.1      |
| 756 | KU862297.1 | Avian_orthoavulavirus_1_isolate_Pigeon/Pak/Lahore/AW-1/2014              | 2014 | Pakistan | Class II | XX    | XX           |
| 757 | KU862298.1 | Avian_orthoavulavirus_1_isolate_Pigeon/Pak/Lahore/AW-2/2015              | 2015 | Pakistan | Class II | XXI   | XXI.1.2      |
| 758 | KU862299.1 | Avian_orthoavulavirus_1_isolate_Pigeon/Pak/Lahore/AW-3/2015              | 2015 | Pakistan | Class II | XXI   | XXI.1.2      |
| 759 | KU885390.1 | Avian_orthoavulavirus_1_isolate_Bhopal_                                  | 2015 | India    | Class II | XXI   | XXI.1.2      |
| 760 | KU885949.1 | Avian_orthoavulavirus_1_isolate_Pigeon/MZS-UVAS-Pak/2014                 | 2014 | Pakistan | Class II | XXI   | XXI.1.2      |
| 761 | KX065188.1 | Avian_orthoavulavirus_1_strain_PPMV-1/QL-01/CH/15                        | 2015 | China    | Class II | VI    | VI.2.1.1.2.1 |
| 762 | KX097024.1 | Pigeon_paramyxovirus_1_strain_N1065/14                                   | 2014 | Brazil   | Class II | VI    | VI.2.1.2     |
| 763 | KX236100.2 | Avian_avulavirus_1_isolate_pigeon/Pakistan/Lahore/21A/2015               | 2015 | Pakistan | Class II | XXI   | XXI.1.2      |
| 764 | KX236101.2 | Avian_avulavirus_1_isolate_pigeon/Pakistan/Lahore/25A/2015               | 2015 | Pakistan | Class II | XX    | XX           |
| 765 | KX247376.1 | Avian_orthoavulavirus_1_strain_PPMV-1/SX-01/Ch/15                        | 2015 | China    | Class II | VI    | VI.2.1.1.2.2 |
| 766 | KX290116.1 | Avian_orthoavulavirus_1_isolate_NDV-8                                    | 2016 | India    | Class II | XVIII | XVIII.1      |
| 767 | KX290120.1 | Avian_orthoavulavirus_1_isolate_NDV-20                                   | 2016 | India    | Class II | XVIII | XVIII.1      |
| 768 | KX496962.1 | Avian_orthoavulavirus_1_isolate_wild_pigeon/Pakistan/Lahore/20A/996/2015 | 2015 | Pakistan | Class II | VII   | VII.2        |
| 769 | KX496964.1 | Avian_orthoavulavirus_1_isolate_pigeon/Pakistan/Lahore/23A/997/2015      | 2015 | Pakistan | Class II | VII   | VII.2        |
| 770 | KX496965.1 | Avian_orthoavulavirus_1_isolate_pigeon/Pakistan/Lahore/21A/1084/2015     | 2015 | Pakistan | Class II | VII   | VII.2        |

|     |            |                                                                             |      |          |          |     |              |
|-----|------------|-----------------------------------------------------------------------------|------|----------|----------|-----|--------------|
| 771 | KX496967.1 | Avian_orthoavulavirus_1_isolate_racing_pigeon/Pakistan/Lahore/24A/1085/2015 | 2015 | Pakistan | Class II | VII | VII.2        |
| 772 | KX580975.1 | Pigeon_paramyxovirus_1_isolate_pigeon/Egypt/Sharkia-1/2014                  | 2014 | Egypt    | Class II | I   | I.1.1        |
| 773 | KX580976.1 | Pigeon_paramyxovirus_1_isolate_pigeon/Egypt/Sharkia-2/2013                  | 2013 | Egypt    | Class II | XXI | XXI.1.1      |
| 774 | KX580977.1 | Pigeon_paramyxovirus_1_isolate_pigeon/Egypt/Sharkia-4/2014                  | 2014 | Egypt    | Class II | I   | I.1.1        |
| 775 | KX580978.1 | Pigeon_paramyxovirus_1_isolate_pigeon/Egypt/Sharkia-5/2014                  | 2014 | Egypt    | Class II | I   | I.1.1        |
| 776 | KX580979.1 | Pigeon_paramyxovirus_1_isolate_pigeon/Egypt/Sharkia-6/2013                  | 2013 | Egypt    | Class II | I   | I.1.1        |
| 777 | KX580980.1 | Pigeon_paramyxovirus_1_isolate_pigeon/Egypt/Sharkia-10/2014                 | 2014 | Egypt    | Class II | I   | I.1.1        |
| 778 | KX580981.1 | Pigeon_paramyxovirus_1_isolate_pigeon/Egypt/Sharkia-11/2015                 | 2015 | Egypt    | Class II | I   | I.1.1        |
| 779 | KX580982.1 | Pigeon_paramyxovirus_1_isolate_pigeon/Egypt/Sharkia-12/2014                 | 2014 | Egypt    | Class II | I   | I.1.1        |
| 780 | KX580983.1 | Pigeon_paramyxovirus_1_isolate_pigeon/Egypt/Sharkia-13/2014                 | 2014 | Egypt    | Class II | I   | I.1.1        |
| 781 | KX580984.1 | Pigeon_paramyxovirus_1_isolate_pigeon/Egypt/Sharkia-14/2014                 | 2014 | Egypt    | Class II | I   | I.1.1        |
| 782 | KX580985.1 | Pigeon_paramyxovirus_1_isolate_pigeon/Egypt/Sharkia-15/2014                 | 2014 | Egypt    | Class II | I   | I.1.1        |
| 783 | KX580986.1 | Pigeon_paramyxovirus_1_isolate_pigeon/Egypt/Sharkia-17/2014                 | 2014 | Egypt    | Class II | XXI | XXI.1.1      |
| 784 | KX580987.1 | Pigeon_paramyxovirus_1_isolate_pigeon/Egypt/Sharkia-18/2014                 | 2014 | Egypt    | Class II | II  | II           |
| 785 | KX580988.1 | Pigeon_paramyxovirus_1_isolate_pigeon/Egypt/Sharkia-19/2015                 | 2015 | Egypt    | Class II | XXI | XXI.1.1      |
| 786 | KX580989.1 | Pigeon_paramyxovirus_1_isolate_pigeon/Egypt/Sharkia-20/2014                 | 2014 | Egypt    | Class II | I   | I.1.1        |
| 787 | KX580990.1 | Pigeon_paramyxovirus_1_isolate_pigeon/Egypt/Sharkia-21/2014                 | 2014 | Egypt    | Class II | I   | I.1.1        |
| 788 | KX580991.1 | Pigeon_paramyxovirus_1_isolate_pigeon/Egypt/Sharkia-22/2014                 | 2014 | Egypt    | Class II | I   | I.1.1        |
| 789 | KX580992.1 | Pigeon_paramyxovirus_1_isolate_pigeon/Egypt/Sharkia-23/2014                 | 2014 | Egypt    | Class II | I   | I.1.1        |
| 790 | KX580993.1 | Pigeon_paramyxovirus_1_isolate_pigeon/Egypt/Sharkia-24/2014                 | 2014 | Egypt    | Class II | I   | I.1.1        |
| 791 | KX710209.1 | Pigeon_paramyxovirus_1_isolate_D167                                         | 2015 | India    | Class II | VI  | VI.2.2.2     |
| 792 | KX710210.1 | Pigeon_paramyxovirus_1_isolate_D168                                         | 2015 | India    | Class II | VI  | VI.2.1.1.2.2 |
| 793 | KX761865.1 | Avian_orthoavulavirus_1_isolate_HB1103                                      | 2011 | China    | Class II | VI  | VI.2.1.1.2.1 |
| 794 | KX781723.1 | Pigeon_paramyxovirus_1_isolate_pigeon/Egypt/Kafrelsheikh-2016               | 2016 | Egypt    | Class II | VI  | VI.2.2.2     |
| 795 | KX831612.1 | Avian_orthoavulavirus_1_isolate_Pigeon/Portugal/16919/2015                  | 2015 | Portugal | Class II | XXI | XXI.2        |
| 796 | KX831613.1 | Avian_orthoavulavirus_1_isolate_Pigeon/Portugal/17991/2015                  | 2015 | Portugal | Class II | XXI | XXI.2        |

|     |            |                                                                        |      |          |          |     |              |
|-----|------------|------------------------------------------------------------------------|------|----------|----------|-----|--------------|
| 797 | KX831614.1 | Avian_orthoavulavirus_1_isolate_Pigeon/Portugal/19095/2015             | 2015 | Portugal | Class II | XXI | XXI.2        |
| 798 | KY042127.1 | Avian_orthoavulavirus_1_isolate_pigeon/Ukraine/Kharkiv/23-01/967/2013  | 2013 | Ukraine  | Class II | XXI | XXI.1.1      |
| 799 | KY042128.1 | Avian_orthoavulavirus_1_isolate_pigeon/Ukraine/Doneck/3/968/2007       | 2007 | Ukraine  | Class II | XXI | XXI.1.1      |
| 800 | KY042129.1 | Avian_orthoavulavirus_1_isolate_pigeon/Egypt/Giza/11/1088/2015         | 2015 | Egypt    | Class II | XXI | XXI.1.1      |
| 801 | KY042130.1 | Avian_orthoavulavirus_1_isolate_pigeon/Egypt/Helwan/44/1106/2015       | 2015 | Egypt    | Class II | XXI | XXI.1.1      |
| 802 | KY042131.1 | Avian_orthoavulavirus_1_isolate_pigeon/Egypt/Qena/56/1107/2015         | 2015 | Egypt    | Class II | XXI | XXI.1.1      |
| 803 | KY042132.1 | Avian_orthoavulavirus_1_isolate_pigeon/Egypt/El_Fayom/73/1111/2015     | 2015 | Egypt    | Class II | XXI | XXI.1.1      |
| 804 | KY042133.1 | Avian_orthoavulavirus_1_isolate_pigeon/Egypt/El_Fayom/79/1112/2015     | 2015 | Egypt    | Class II | XXI | XXI.1.1      |
| 805 | KY042134.1 | Avian_orthoavulavirus_1_isolate_pigeon/Egypt/El_Fayom/84/1113/2015     | 2015 | Egypt    | Class II | XXI | XXI.1.1      |
| 806 | KY042135.1 | Avian_orthoavulavirus_1_isolate_pigeon/Pakistan/Lahore/22A/1001/2015   | 2015 | Pakistan | Class II | XX  | XX           |
| 807 | KY042136.1 | Avian_orthoavulavirus_1_isolate_pigeon/Pakistan/Lahore/125/2015        | 2015 | Pakistan | Class II | XXI | XXI.1.1      |
| 808 | KY042137.1 | Avian_orthoavulavirus_1_isolate_pigeon/Pakistan/Jhang/115/2015         | 2015 | Pakistan | Class II | XXI | XXI.1.1      |
| 809 | KY042138.1 | Avian_orthoavulavirus_1_isolate_pigeon/Pakistan/Lahore/126/2015        | 2015 | Pakistan | Class II | XXI | XXI.1.1      |
| 810 | KY042139.1 | Avian_orthoavulavirus_1_isolate_pigeon/Pakistan/Lahore/146/2016        | 2016 | Pakistan | Class II | XXI | XXI.1.1      |
| 811 | KY042140.1 | Avian_orthoavulavirus_1_isolate_pigeon/Pakistan/Jallo-Lahore/221A/2016 | 2016 | Pakistan | Class II | XX  | XX           |
| 812 | KY042141.1 | Avian_orthoavulavirus_1_isolate_pigeon/Pakistan/Jallo-Lahore/221B/2016 | 2016 | Pakistan | Class II | XX  | XX           |
| 813 | KY174317.1 | Pigeon_paramyxovirus_1_isolate_APMV1/Egypt/1/2016                      | 2016 | Egypt    | Class II | I   | I.1.1        |
| 814 | KY174318.1 | Pigeon_paramyxovirus_1_isolate_APMV1/Egypt/2/2016                      | 2016 | Egypt    | Class II | XXI | XXI.1.2      |
| 815 | KY174319.1 | Pigeon_paramyxovirus_1_isolate_APMV1/Egypt/3/2016                      | 2016 | Egypt    | Class II | I   | I.1.1        |
| 816 | KY174320.1 | Pigeon_paramyxovirus_1_isolate_APMV1/Egypt/4/2016                      | 2016 | Egypt    | Class II | I   | I.1.1        |
| 817 | KY569334.1 | Avian_orthoavulavirus_1_isolate_pigeon/Malaysia/Selangor/1676/2006     | 2006 | Malaysia | Class II | VI  | VI.2.1.1.2.1 |
| 818 | KY569335.1 | Avian_orthoavulavirus_1_isolate_pigeon/Malaysia/Penang/14879/2011      | 2011 | Malaysia | Class II | VI  | VI.2.1.1.2.2 |
| 819 | KY788667.1 | Avian_orthoavulavirus_1_isolate_European_turtle_dove/Ch/GD/GZ23/2015   | 2015 | China    | Class II | VI  | VI.2.1.1.2.2 |
| 820 | KY788669.1 | Avian_orthoavulavirus_1_isolate_Spotted_dove/Ch/GD/GZ232/2014          | 2014 | China    | Class II | IX  | IX           |
| 821 | LC055504.1 | Pigeon_paramyxovirus_1strain:_PPMV1-2CN                                | 2014 | Iran     | Class II | XXI | XXI.1.1      |
| 822 | LC055505.1 | Pigeon_paramyxovirus_1strain:_PPMV1-7TS                                | 2014 | Iran     | Class II | XXI | XXI.1.1      |

|     |            |                                                           |      |        |          |     |              |
|-----|------------|-----------------------------------------------------------|------|--------|----------|-----|--------------|
| 823 | LC055506.1 | Pigeon_paramyxovirus_1strain:_PPMV1-8TS                   | 2014 | Iran   | Class II | XXI | XXI.1.1      |
| 824 | LC055507.1 | Pigeon_paramyxovirus_1strain:_PPMV1-14B                   | 2013 | Iran   | Class II | XXI | XXI.1.1      |
| 825 | LC055508.1 | Pigeon_paramyxovirus_1strain:_PPMV1-16T                   | 2014 | Iran   | Class II | XXI | XXI.1.1      |
| 826 | LC055509.1 | Pigeon_paramyxovirus_1strain:_PPMV1-16CT                  | 2014 | Iran   | Class II | XXI | XXI.1.1      |
| 827 | LC055510.1 | Pigeon_paramyxovirus_1strain:_PPMV1-18TS                  | 2014 | Iran   | Class II | XXI | XXI.1.1      |
| 828 | LC055511.1 | Pigeon_paramyxovirus_1strain:_PPMV1-18CS                  | 2014 | Iran   | Class II | XXI | XXI.1.1      |
| 829 | LC055512.1 | Pigeon_paramyxovirus_1strain:_PPMV1-21TS                  | 2014 | Iran   | Class II | XXI | XXI.1.1      |
| 830 | LC055513.1 | Pigeon_paramyxovirus_1strain:_PPMV1-21CS                  | 2014 | Iran   | Class II | XXI | XXI.1.1      |
| 831 | LC055514.1 | Pigeon_paramyxovirus_1strain:_PPMV1-51B                   | 2014 | Iran   | Class II | XXI | XXI.1.1      |
| 832 | LC055515.1 | Pigeon_paramyxovirus_1strain:_PPMV1-52CT                  | 2014 | Iran   | Class II | XXI | XXI.1.1      |
| 833 | LC500946.1 | Avian_orthoavulavirus_1_APMV1/pigeon/Japan/Kumamoto/2001  | 2001 | Japan  | Class II | VI  | VI.2.1.1.2.1 |
| 834 | LC500947.1 | Avian_orthoavulavirus_1_APMV1/pigeon/Japan/Hiroshima/2002 | 2002 | Japan  | Class II | VI  | VI.2.1.1.2.1 |
| 835 | LC500948.1 | Avian_orthoavulavirus_1_APMV1/pigeon/Japan/Shizuoka/2002  | 2002 | Japan  | Class II | VI  | VI.2.1.1.2.1 |
| 836 | LC500951.1 | Avian_orthoavulavirus_1_APMV1/pigeon/Japan/Mie/2002       | 2002 | Japan  | Class II | VI  | VI.2.1.1.2.1 |
| 837 | LC500953.1 | Avian_orthoavulavirus_1_APMV1/pigeon/Japan/Saitama-1/2003 | 2003 | Japan  | Class II | VI  | VI.2.1.1.2.1 |
| 838 | LC500954.1 | Avian_orthoavulavirus_1_APMV1/pigeon/Japan/Saitama-2/2003 | 2003 | Japan  | Class II | VI  | VI.2.1.1.2.1 |
| 839 | LC500959.1 | Avian_orthoavulavirus_1_APMV1/pigeon/Japan/Tokyo/2006     | 2006 | Japan  | Class II | VI  | VI.2.1.1.2.1 |
| 840 | LC500960.1 | Avian_orthoavulavirus_1_APMV1/pigeon/Japan/Niigata/2007   | 2007 | Japan  | Class II | VI  | VI.2.1.1.2.1 |
| 841 | LC552053.1 | Pigeon_paramyxovirus_1_PPMV1/BR/CCZ/2019                  | 2019 | Brazil | Class II | VI  | VI.2.1.2     |
| 842 | MF100759.1 | Avian_orthoavulavirus_1_isolate_P/GD/GZ/178/2016          | 2016 | China  | Class I  | 1   | 1.1.2        |
| 843 | MF100760.1 | Avian_orthoavulavirus_1_isolate_P/GD/DG/466/2016          | 2016 | China  | Class I  | 1   | 1.1.2        |
| 844 | MF100761.1 | Avian_orthoavulavirus_1_isolate_P/GD/HZ/599/2016          | 2016 | China  | Class I  | 1   | 1.1.2        |
| 845 | MF179097.1 | Pigeon_paramyxovirus_1_isolate_Pigeon/Tehran/GH01/2014    | 2014 | Tehran | Class II | XXI | XXI.1.1      |
| 846 | MF179098.1 | Pigeon_paramyxovirus_1_isolate_Pigeon/Tehran/GH02/2014    | 2014 | Tehran | Class II | XXI | XXI.1.1      |
| 847 | MF179099.1 | Pigeon_paramyxovirus_1_isolate_Pigeon/Tehran/GH03/2014    | 2014 | Tehran | Class II | XXI | XXI.1.1      |
| 848 | MF179100.1 | Pigeon_paramyxovirus_1_isolate_Pigeon/Tehran/GH04/2014    | 2014 | Tehran | Class II | XXI | XXI.1.1      |

|     |            |                                                                                          |      |         |          |     |              |
|-----|------------|------------------------------------------------------------------------------------------|------|---------|----------|-----|--------------|
| 849 | MF179101.1 | Pigeon_paramyxovirus_1_isolate_Pigeon/Tehran/GH05/2014                                   | 2014 | Tehran  | Class II | XXI | XXI.1.1      |
| 850 | MF278934.1 | Avian_orthoavulavirus_1_strain_PG/GZ/HD/PN/2011                                          | 2011 | China   | Class II | XX  | XX           |
| 851 | MF375924.1 | Pigeon_paramyxovirus_1_isolate_pigeon/Egypt/KFS/2017/2                                   | 2017 | Egypt   | Class II | XXI | XXI.1.1      |
| 852 | MF580815.1 | Pigeon_paramyxovirus_1_isolate_pi/CH/GX0094/2011                                         | 2011 | China   | Class II | VI  | VI.2.1.1.2.2 |
| 853 | MF580816.1 | Pigeon_paramyxovirus_1_isolate_pi/CH/GX0001/2012                                         | 2012 | China   | Class II | VI  | VI.2.1.1.2.2 |
| 854 | MF580817.1 | Pigeon_paramyxovirus_1_isolate_pi/CH/GX0012/2012                                         | 2012 | China   | Class II | VI  | VI.2.1.1.2.2 |
| 855 | MF580818.1 | Pigeon_paramyxovirus_1_isolate_pi/CH/GX0019/2012                                         | 2012 | China   | Class II | VI  | VI.2.1.1.2.2 |
| 856 | MF580819.1 | Pigeon_paramyxovirus_1_isolate_pi/CH/GX0022/2012                                         | 2012 | China   | Class II | VI  | VI.2.1.1.2.2 |
| 857 | MF580820.1 | Pigeon_paramyxovirus_1_isolate_pi/CH/GX0029/2012                                         | 2012 | China   | Class II | VI  | VI.2.1.1.2.2 |
| 858 | MF580821.1 | Pigeon_paramyxovirus_1_isolate_pi/CH/GX0031/2012                                         | 2012 | China   | Class II | VI  | VI.2.1.1.2.2 |
| 859 | MF580822.1 | Pigeon_paramyxovirus_1_isolate_pi/CH/GX0034/2012                                         | 2012 | China   | Class II | VI  | VI.2.1.1.2.2 |
| 860 | MF580823.1 | Pigeon_paramyxovirus_1_isolate_pi/CH/GX0505/2012                                         | 2012 | China   | Class II | VI  | VI.2.1.1.2.2 |
| 861 | MF580824.1 | Pigeon_paramyxovirus_1_isolate_pi/CH/GX0004/2013                                         | 2013 | China   | Class II | VI  | VI.2.1.1.2.2 |
| 862 | MF580825.1 | Pigeon_paramyxovirus_1_isolate_pi/CH/GX0119/2015                                         | 2015 | China   | Class II | VI  | VI.2.1.1.2.2 |
| 863 | MF580826.1 | Pigeon_paramyxovirus_1_isolate_pi/CH/GX0126/2015                                         | 2015 | China   | Class II | VI  | VI.2.1.1.2.2 |
| 864 | MF580827.1 | Pigeon_paramyxovirus_1_isolate_pi/CH/GX1103/2015                                         | 2015 | China   | Class II | VI  | VI.2.1.1.2.2 |
| 865 | MF614961.1 | Pigeon_paramyxovirus_1_isolate_pigeon/Egypt/KFS/2017/5                                   | 2017 | Egypt   | Class II | II  | II           |
| 866 | MF681711.1 | Avian_orthoavulavirus_1_isolate_4533                                                     | 2017 | Namibia | Class II | VI  | VI.2.1.1.2.1 |
| 867 | MF681712.1 | Avian_orthoavulavirus_1_isolate_5072                                                     | 2016 | Namibia | Class II | VI  | VI.2.1.1.2.1 |
| 868 | MF681713.1 | Avian_orthoavulavirus_1_isolate_7808                                                     | 2016 | Namibia | Class II | I   | I.1.1        |
| 869 | MF681714.1 | Avian_orthoavulavirus_1_isolate_7855                                                     | 2016 | Namibia | Class II | I   | I.1.1        |
| 870 | MF681715.1 | Avian_orthoavulavirus_1_isolate_8199                                                     | 2016 | Namibia | Class II | VI  | VI.2.1.1.2.1 |
| 871 | MF681716.1 | Avian_orthoavulavirus_1_isolate_8636                                                     | 2016 | Namibia | Class II | I   | I.1.1        |
| 872 | MG018201.1 | Avian_orthoavulavirus_1_isolate_Rock_Pigeon/USA/MA/1188-kidney/24998-1G/2014             | 2014 | USA     | Class II | VI  | VI.2.1.1.1   |
| 873 | MG018202.1 | Avian_orthoavulavirus_1_isolate_Eurasian_Collared-Dove/USA/MT/1177-kidney/22919-1-B/2010 | 2010 | USA     | Class II | VI  | VI.2.1.1.1   |
| 874 | MG018203.1 | Avian_orthoavulavirus_1_isolate_Eurasian_Collared-Dove/USA/MT/1177-liver/22919-1-B/2010  | 2010 | USA     | Class II | VI  | VI.2.1.1.1   |

|     |            |                                                                                          |      |       |          |     |              |
|-----|------------|------------------------------------------------------------------------------------------|------|-------|----------|-----|--------------|
| 875 | MG018204.1 | Avian_orthoavulavirus_1_isolate_Eurasian_Collared-Dove/USA/MT/1177-spleen/22919-1-B/2010 | 2010 | USA   | Class II | VI  | VI.2.1.1.1   |
| 876 | MG018205.1 | Avian_orthoavulavirus_1_isolate_Eurasian_Collared-Dove/USA/TX/1179-kidney/26041-3-C/2014 | 2014 | USA   | Class II | VI  | VI.2.1.1.1   |
| 877 | MG018206.1 | Avian_orthoavulavirus_1_isolate_Eurasian_Collared-Dove/USA/TX/1180-kidney/26041-4-C/2014 | 2014 | USA   | Class II | VI  | VI.2.1.1.1   |
| 878 | MG018207.1 | Avian_orthoavulavirus_1_isolate_Eurasian_Collared-Dove/USA/TX/1180-liver/26041-4-C/2014  | 2014 | USA   | Class II | VI  | VI.2.1.1.1   |
| 879 | MG018208.1 | Avian_orthoavulavirus_1_isolate_Eurasian_Collared-Dove/USA/UT/1181-spleen/26594-1-A/2015 | 2015 | USA   | Class II | VI  | VI.2.1.1.1   |
| 880 | MG018209.1 | Avian_orthoavulavirus_1_isolate_Eurasian_Collared-Dove/USA/TX/1182-spleen/26877-2-C/2016 | 2016 | USA   | Class II | VI  | VI.2.1.1.1   |
| 881 | MG018210.1 | Avian_orthoavulavirus_1_isolate_Eurasian_Collared-Dove/USA/TX/1184-kidney/26981-2-C/2015 | 2015 | USA   | Class II | VI  | VI.2.1.1.1   |
| 882 | MG018211.1 | Avian_orthoavulavirus_1_isolate_Eurasian_Collared-Dove/USA/TX/1185-kidney/26981-3-A/2015 | 2015 | USA   | Class II | VI  | VI.2.1.1.1   |
| 883 | MG018212.1 | Avian_orthoavulavirus_1_isolate_Rock_Pigeon/USA/MA/1188-spleen/24998-1-B/2014            | 2014 | USA   | Class II | VI  | VI.2.1.1.1   |
| 884 | MG018213.1 | Avian_orthoavulavirus_1_isolate_Eurasian_Collared-Dove/USA/KS/1191-spleen/W16-453-3/2016 | 2016 | USA   | Class II | VI  | VI.2.1.1.1   |
| 885 | MG018214.1 | Avian_orthoavulavirus_1_isolate_Eurasian_Collared-Dove/USA/KS/1192-kidney/W16-454-2/2016 | 2016 | USA   | Class II | VI  | VI.2.1.1.1   |
| 886 | MG018215.1 | Avian_orthoavulavirus_1_isolate_Eurasian_Collared-Dove/USA/KS/1194-kidney/W16-456-2/2016 | 2016 | USA   | Class II | VI  | VI.2.1.1.1   |
| 887 | MG018216.1 | Avian_orthoavulavirus_1_isolate_Eurasian_Collared-Dove/USA/KS/1195-kidney/W16-457-2/2016 | 2016 | USA   | Class II | VI  | VI.2.1.1.1   |
| 888 | MG018217.1 | Avian_orthoavulavirus_1_isolate_Eurasian_Collared-Dove/USA/TX/1180-spleen/26041-4-C/2014 | 2014 | USA   | Class II | VI  | VI.2.1.1.1   |
| 889 | MG018218.1 | Avian_orthoavulavirus_1_isolate_Rock_Pigeon/USA/PA/1189-kidney/23844-3-C/2012            | 2012 | USA   | Class II | VI  | VI.2.1.1.1   |
| 890 | MG018219.1 | Avian_orthoavulavirus_1_isolate_Eurasian_Collared-Dove/USA/KS/1193-kidney/W16-455-2/2016 | 2016 | USA   | Class II | VI  | VI.2.1.1.1   |
| 891 | MG018220.1 | Avian_orthoavulavirus_1_isolate_Eurasian_Collared-Dove/USA/KS/1191-kidney/W16-453-3/2016 | 2016 | USA   | Class II | VI  | VI.2.1.1.1   |
| 892 | MG018221.1 | Avian_orthoavulavirus_1_isolate_Eurasian_Collared-Dove/USA/TX/1182-kidney/26877-2-C/2016 | 2016 | USA   | Class II | VI  | VI.2.1.1.1   |
| 893 | MG018222.1 | Avian_orthoavulavirus_1_isolate_Eurasian_Collared-Dove/USA/UT/1181-liver/26594-1-D/2015  | 2015 | USA   | Class II | VI  | VI.2.1.1.1   |
| 894 | MG018223.1 | Avian_orthoavulavirus_1_isolate_Eurasian_Collared-Dove/USA/UT/1181-kidney/26594-1-D/2015 | 2015 | USA   | Class II | VI  | VI.2.1.1.1   |
| 895 | MG456676.1 | Avian_orthoavulavirus_1_strain_APMV-1/collared_dove/Iran/2014                            | 2014 | Iran  | Class II | XXI | XXI.2        |
| 896 | MG840652.1 | Avian_orthoavulavirus_1_strain_pigeon/Fujian/1233/2014                                   | 2014 | China | Class II | VI  | VI.2.1.1.2.2 |
| 897 | MG840653.1 | Avian_orthoavulavirus_1_strain_pigeon/Guizhou/1050/2017                                  | 2017 | China | Class II | VI  | VI.2.1.1.2.2 |
| 898 | MG840654.1 | Avian_orthoavulavirus_1_strain_pigeon/Ningxia/2068/2016                                  | 2016 | China | Class II | VI  | VI.2.1.1.2.2 |
| 899 | MG840655.1 | Avian_orthoavulavirus_1_strain_pigeon/Qinghai/1325/2017                                  | 2017 | China | Class II | VI  | VI.2.1.1.2.2 |
| 900 | MG840656.1 | Avian_orthoavulavirus_1_strain_pigeon/Qinghai/1344/2017                                  | 2017 | China | Class II | VI  | VI.2.1.1.2.2 |

|     |            |                                                                                |      |          |          |     |              |
|-----|------------|--------------------------------------------------------------------------------|------|----------|----------|-----|--------------|
| 901 | MG840657.1 | Avian_orthoavulavirus_1_strain_pigeon/Sichuan/2045/2014                        | 2014 | China    | Class II | VI  | VI.2.1.1.2.2 |
| 902 | MG840658.1 | Avian_orthoavulavirus_1_strain_pigeon/Yunnan/1205/2015                         | 2015 | China    | Class II | VI  | VI.2.1.1.2.2 |
| 903 | MG840659.1 | Avian_orthoavulavirus_1_strain_pigeon/Yunnan/1336/2015                         | 2015 | China    | Class II | VI  | VI.2.1.1.2.2 |
| 904 | MG840660.1 | Avian_orthoavulavirus_1_strain_pigeon/Yunnan/1453/2017                         | 2017 | China    | Class II | VI  | VI.2.1.1.2.2 |
| 905 | MG878084.1 | Pigeon_paramyxovirus_1_strain_Pi/CH/LN/2017                                    | 2017 | China    | Class II | VI  | VI.2.1.1.2.2 |
| 906 | MH044693.1 | Avian_orthoavulavirus_1_isolate_Eurasian_collared_dove/Iran/Konarak/Barin/2017 | 2017 | Iran     | Class II | XXI | XXI.2        |
| 907 | MH105248.1 | Avian_orthoavulavirus_1_strain_pigeon/Yunnan/1135/2017                         | 2017 | China    | Class II | VII | VII.2        |
| 908 | MH247188.1 | Avian_orthoavulavirus_1_strain_Pg/IR/MAM39/2017                                | 2017 | Iran     | Class II | XXI | XXI.1.1      |
| 909 | MH289936.1 | Avian_orthoavulavirus_1_strain_NDV/Pigeon/CN/JX/163X/2016                      | 2016 | China    | Class I  | 1   | 1.1.2        |
| 910 | MH371057.1 | Avian_orthoavulavirus_1_isolate_PHL137866                                      | 2011 | Israel   | Class II | VI  | VI.2.1.2     |
| 911 | MH371091.1 | Avian_orthoavulavirus_1_isolate_PHL133813                                      | 2011 | Israel   | Class II | VI  | VI.2.1.2     |
| 912 | MH377247.1 | Avian_orthoavulavirus_1_isolate_PHL37114.2                                     | 2008 | Israel   | Class II | VI  | VI.2.1.2     |
| 913 | MH377248.1 | Avian_orthoavulavirus_1_isolate_PHL37114                                       | 2008 | Israel   | Class II | VII | VII.1.1      |
| 914 | MH377250.1 | Avian_orthoavulavirus_1_isolate_PHL76558                                       | 2009 | Israel   | Class II | VII | VII.1.1      |
| 915 | MH377298.1 | Avian_orthoavulavirus_1_isolate_PHL264746                                      | 2010 | Israel   | Class II | VI  | VI.2.1.1.2.2 |
| 916 | MH377302.1 | Avian_orthoavulavirus_1_isolate_PHL264752                                      | 2012 | Israel   | Class II | VI  | VI.2.1.2     |
| 917 | MH577764.1 | Avian_orthoavulavirus_1_strain_NDV/P/17/RSP-1_                                 | 2017 | India    | Class II | II  | II           |
| 918 | MH717070.1 | Avian_orthoavulavirus_1_isolate_Pigeon/AJK/AW-p54/2018                         | 2018 | Pakistan | Class II | XXI | XXI.1.1      |
| 919 | MH717071.1 | Avian_orthoavulavirus_1_isolate_Pigeon/AJK/AW-p51/2018                         | 2018 | Pakistan | Class II | XX  | XX           |
| 920 | MH717072.1 | Avian_orthoavulavirus_1_isolate_Pigeon/AJK/AW-p52/2018                         | 2018 | Pakistan | Class II | XX  | XX           |
| 921 | MH717073.1 | Avian_orthoavulavirus_1_isolate_Pigeon/AJK/AW-p53/2018                         | 2018 | Pakistan | Class II | XX  | XX           |
| 922 | MH723605.1 | Avian_orthoavulavirus_1_isolate_3pi/Egypt/EI Sharkia/2016                      | 2016 | Egypt    | Class II | XXI | XXI.1.1      |
| 923 | MH723606.1 | Avian_orthoavulavirus_1_isolate_1pi/Egypt/EI Sharkia/2016                      | 2016 | Egypt    | Class II | XXI | XXI.1.1      |
| 924 | MH723607.1 | Avian_orthoavulavirus_1_isolate_2pi/Egypt/EI Sharkia/2016                      | 2016 | Egypt    | Class II | XXI | XXI.1.1      |
| 925 | MH723608.1 | Avian_orthoavulavirus_1_isolate_5pi/Egypt/EI Sharkia/2016                      | 2016 | Egypt    | Class II | XXI | XXI.1.1      |
| 926 | MH723609.1 | Avian_orthoavulavirus_1_isolate_10pi/Egypt/EI Sharkia/2016                     | 2016 | Egypt    | Class II | XXI | XXI.1.1      |

|     |            |                                                                                           |      |          |          |      |              |
|-----|------------|-------------------------------------------------------------------------------------------|------|----------|----------|------|--------------|
| 927 | MH723610.1 | Avian_orthoavulavirus_1_isolate_8pi/Egypt/EI Sharkia/2016                                 | 2016 | Egypt    | Class II | XXI  | XXI.1.1      |
| 928 | MH723611.1 | Avian_orthoavulavirus_1_isolate_4pi/Egypt/EI Sharkia/2016                                 | 2016 | Egypt    | Class II | XXI  | XXI.1.1      |
| 929 | MH807446.1 | Pigeon_paramyxovirus_1_isolate_PPMV-1/BJ-01/CH                                            | 2016 | China    | Class II | VI   | VI.2.1.1.2.2 |
| 930 | MH996902.1 | Avian_orthoavulavirus_1_isolate_pigeon/Bulgaria/Septemvritsi/1157/1982                    | 1982 | Bulgaria | Class II | V    | V.3          |
| 931 | MH996904.1 | Avian_orthoavulavirus_1_isolate_pigeon/Bulgaria/Novo Selo/1161/1995                       | 1955 | Bulgaria | Class II | III  | III          |
| 932 | MH996922.1 | Avian_orthoavulavirus_1_isolate_pigeon/Nigeria/KT/MSH/15C/N2/689/2009                     | 2009 | Nigeria  | Class II | XIV  | XIV.2        |
| 933 | MH996943.1 | Avian_orthoavulavirus_1_isolate_pigeon/Nigeria/YB/GSH1/4-6T-XIV/N3/713/2009               | 2009 | Nigeria  | Class II | XIV  | XIV.2        |
| 934 | MH996944.1 | Avian_orthoavulavirus_1_isolate_pigeon/Nigeria/YB/GSH1/4-6T-XVII/N3/713/2009              | 2009 | Nigeria  | Class II | XVII | XVII         |
| 935 | MH996953.1 | Avian_orthoavulavirus_1_isolate_pigeon/Nigeria/Kazaure/VRD231/42/2007                     | 2007 | Nigeria  | Class II | XXI  | XXI.1.1      |
| 936 | MH996979.1 | Avian_orthoavulavirus_1_isolate_pigeon/Nigeria/Gumel/VRD37A/51/2008                       | 2008 | Nigeria  | Class II | VI   | VI.2.1.2     |
| 937 | MH996992.1 | Avian_orthoavulavirus_1_isolate_pigeon/Nigeria/Alaba_rago/VRD32/15/32/2015                | 2015 | Nigeria  | Class II | VI   | VI.2.1.2     |
| 938 | MK005973.1 | Avian_orthoavulavirus_1_isolate_pigeon/Egypt/Souqal-GomaaMarket/Cairo/39/CL-G23/1105/2015 | 2015 | Egypt    | Class II | XXI  | XXI.1.1      |
| 939 | MK005974.1 | Avian_orthoavulavirus_1_isolate_pigeon/Egypt/Cairo/17/CL-PG-G2/2015                       | 2015 | Egypt    | Class II | VII  | VII.2        |
| 940 | MK005995.1 | Avian_orthoavulavirus_1_isolate_pigeon/Egypt/Souqal-GomaaMarket/Cairo/19/CL-G3/1090/2015  | 2015 | Egypt    | Class II | VII  | VII.1.1      |
| 941 | MK005996.1 | Avian_orthoavulavirus_1_isolate_pigeon/Egypt/Souqal-GomaaMarket/Cairo/27/OP-G9/1091/2015  | 2015 | Egypt    | Class II | VII  | VII.1.1      |
| 942 | MK005997.1 | Avian_orthoavulavirus_1_isolate_pigeon/Egypt/Souqal-GomaaMarket/Cairo/28/OP-G27/1109/2015 | 2015 | Egypt    | Class II | VII  | VII.1.1      |
| 943 | MK005998.1 | Avian_orthoavulavirus_1_isolate_pigeon/Egypt/1095/Giza/15/CL-PG/1095/2015                 | 2015 | Egypt    | Class II | VII  | VII.1.1      |
| 944 | MK005999.1 | Avian_orthoavulavirus_1_isolate_pigeon/Egypt/1108/Cairo/24/OP-PG/1108/2015                | 2015 | Egypt    | Class II | VII  | VII.1.1      |
| 945 | MK006024.1 | Avian_orthoavulavirus_1_isolate_pigeon/Vietnam/484/2002                                   | 2002 | Vietnam  | Class II | I    | I.1.1        |
| 946 | MK040379.1 | Avian_orthoavulavirus_1_strain_pigeon/California/B1800323-2.1/2018                        | 2018 | USA      | Class II | V    | V.1          |
| 947 | MK046916.1 | Avian_orthoavulavirus_1_isolate_dove/Mexico/Jalisco/Ave2-01/2017                          | 2017 | Mexico   | Class II | V    | V.2          |
| 948 | MK046917.1 | Avian_orthoavulavirus_1_isolate_pigeon/Mexico/Jalisco/Ave3-01/2017                        | 2017 | Mexico   | Class II | V    | V.2          |
| 949 | MK046918.1 | Avian_orthoavulavirus_1_isolate_pigeon/Mexico/Jalisco/Ave4-01/2017                        | 2017 | Mexico   | Class II | V    | V.2          |
| 950 | MK046919.1 | Avian_orthoavulavirus_1_isolate_pigeon/Mexico/Jalisco/Ave5-01/2017                        | 2017 | Mexico   | Class II | V    | V.2          |
| 951 | MK046921.1 | Avian_orthoavulavirus_1_isolate_pigeon/Mexico/Jalisco/LV-7213/2017                        | 2017 | Mexico   | Class II | VI   | VI.2.1.1.1   |
| 952 | MK335466.1 | Avian_orthoavulavirus_1_strain_pi/CH/LNPPMV17_                                            | 2017 | China    | Class II | VI   | VI.2.1.1.2.2 |



|     |            |                                                                                |      |                      |          |      |              |
|-----|------------|--------------------------------------------------------------------------------|------|----------------------|----------|------|--------------|
| 953 | MK469964.1 | Pigeon_paramyxovirus_1_strain_Pi/CH/GXG20/2015                                 | 2015 | China                | Class II | VI   | VI.2.1.1.2.2 |
| 954 | MK469965.1 | Pigeon_paramyxovirus_1_strain_Pi/CH/GXG29/2016                                 | 2016 | China                | Class II | VI   | VI.2.1.1.2.2 |
| 955 | MK469966.1 | Pigeon_paramyxovirus_1_strain_Pi/CH/GXG6/2015                                  | 2015 | China                | Class II | VI   | VI.2.1.1.2.1 |
| 956 | MK469967.1 | Pigeon_paramyxovirus_1_strain_Pi/CH/GXG33/2016                                 | 2016 | China                | Class II | VI   | VI.2.1.1.2.2 |
| 957 | MK469968.1 | Pigeon_paramyxovirus_1_strain_Pi/CH/GXG35/2017                                 | 2017 | China                | Class II | VI   | VI.2.1.1.2.2 |
| 958 | MK469969.1 | Pigeon_paramyxovirus_1_strain_Pi/CH/GXG2/2012                                  | 2012 | China                | Class II | VI   | VI.2.1.1.2.1 |
| 959 | MK469970.1 | Pigeon_paramyxovirus_1_strain_Pi/CH/GXG3/2012                                  | 2012 | China                | Class II | VI   | VI.2.1.1.2.2 |
| 960 | MK469971.1 | Pigeon_paramyxovirus_1_strain_Pi/CH/GXG6/2013                                  | 2013 | China                | Class II | VI   | VI.2.1.1.2.2 |
| 961 | MK469972.1 | Pigeon_paramyxovirus_1_strain_Pi/CH/GXG7/2014                                  | 2014 | China                | Class II | VI   | VI.2.1.1.2.1 |
| 962 | MK469973.1 | Pigeon_paramyxovirus_1_strain_Pi/CH/GXG13/2014                                 | 2014 | China                | Class II | VI   | VI.2.1.1.2.2 |
| 963 | MK469974.1 | Pigeon_paramyxovirus_1_strain_Pi/CH/GXG16/2013                                 | 2013 | China                | Class II | VI   | VI.2.1.1.2.1 |
| 964 | MK516200.1 | Avian_orthoavulavirus_1_strain_Pigeon/China/SD01/2013                          | 2013 | China                | Class II | VI   | VI.2.1.1.2.2 |
| 965 | MK516201.1 | Avian_orthoavulavirus_1_strain_Pigeon/China/SD03/2013                          | 2013 | China                | Class II | VI   | VI.2.1.1.2.2 |
| 966 | MK544894.1 | Avian_orthoavulavirus_1_isolate_pigeon/NDV/India/IVRI/Bareilly/06/2017         | 2017 | India                | Class II | XXI  | XXI.1.2      |
| 967 | MK561384.1 | Avian_orthoavulavirus_1_strain_AAvV-1/Pigeon/UAE/P783/2017                     | 2017 | United Arab Emirates | Class II | XXI  | XXI.1.2      |
| 968 | MK561387.1 | Avian_orthoavulavirus_1_strain_AAvV-1/Pigeon/UAE/P1071/2016                    | 2016 | United Arab Emirates | Class II | XX   | XX           |
| 969 | MK561389.1 | Avian_orthoavulavirus_1_strain_AAvV-1/Pigeon/UAE/P1127/2017                    | 2017 | United Arab Emirates | Class II | XX   | XX           |
| 970 | MK561401.1 | Avian_orthoavulavirus_1_strain_AAvV-1/Pigeon/UAE/E5633/2016                    | 2016 | United Arab Emirates | Class II | XXI  | XXI.1.2      |
| 971 | MK561404.1 | Avian_orthoavulavirus_1_strain_AAvV-1/Pigeon/UAE/E5638/2016                    | 2016 | United Arab Emirates | Class II | XVII | XVII         |
| 972 | MK592884.1 | Pigeon_paramyxovirus_1_isolate_pigeon/Iran/UT-EGV/2018                         | 2018 | Iran                 | Class II | XXI  | XXI.1.1      |
| 973 | MK693035.1 | Avian_orthoavulavirus_1_isolate_AAvV-1/rock_dove/Southern_Kazakhstan/6444/2014 | 2014 | Kazakhstan           | Class II | XXI  | XXI.1.1      |

|     |            |                                                             |      |           |          |       |              |
|-----|------------|-------------------------------------------------------------|------|-----------|----------|-------|--------------|
| 974 | MK749297.1 | Pigeon_paramyxovirus_1_strain_Pi/CH/GXG1/2012               | 2012 | China     | Class II | VI    | VI.2.1.1.2.2 |
| 975 | MK749298.1 | Pigeon_paramyxovirus_1_strain_Pi/CH/GXG22/2015              | 2015 | China     | Class II | VI    | VI.2.1.1.2.2 |
| 976 | MK749299.1 | Pigeon_paramyxovirus_1_strain_Pi/CH/GXG24/2015              | 2015 | China     | Class II | VI    | VI.2.1.1.2.2 |
| 977 | MK749300.1 | Pigeon_paramyxovirus_1_strain_Pi/CH/GXG25/2015              | 2015 | China     | Class II | VI    | VI.2.1.1.2.2 |
| 978 | MK749301.1 | Pigeon_paramyxovirus_1_strain_Pi/CH/GXG28/2016              | 2016 | China     | Class II | VI    | VI.2.1.1.2.2 |
| 979 | MK749302.1 | Pigeon_paramyxovirus_1_strain_Pi/CH/GXG31/2016              | 2016 | China     | Class II | VI    | VI.2.1.1.2.2 |
| 980 | MK764392.1 | Avian_orthoavulavirus_1_isolate_TJ/1/15/Pi                  | 2015 | China     | Class II | VI    | VI.2.1.1.2.2 |
| 981 | MK896851.1 | Pigeon_paramyxovirus_1_isolate_pi/CH/SD0315/2018            | 2018 | China     | Class II | VI    | VI.2.1.1.2.2 |
| 982 | MK937786.1 | Avian_orthoavulavirus_1_strain_ChinaSHJD132017              | 2017 | China     | Class II | VII   | VII.1.1      |
| 983 | MK973060.1 | Avian_orthoavulavirus_1_strain_pigeon/hebei/08/2017         | 2017 | China     | Class II | VI    | VI.2.1.1.2.2 |
| 984 | MN087446.1 | UNVERIFIED:_Avian_orthoavulavirus_1_strain_AAV1/pigeon/Iraq | ?    | Iraq      | Class II | II    | II           |
| 985 | MN164450.1 | Pigeon_paramyxovirus_1_isolate_PPMV-1/INDIA/1/2019          | 2019 | India     | Class II | XXI   | XXI.1.2      |
| 986 | MN164451.1 | Pigeon_paramyxovirus_1_isolate_PPMV-1/INDIA/2/2019          | 2019 | India     | Class II | XXI   | XXI.1.2      |
| 987 | MN164452.1 | Pigeon_paramyxovirus_1_isolate_PPMV-1/INDIA/3/2019          | 2019 | India     | Class II | XXI   | XXI.1.2      |
| 988 | MN164453.1 | Pigeon_paramyxovirus_1_isolate_PPMV-1/INDIA/4/2019          | 2019 | India     | Class II | XXI   | XXI.1.2      |
| 989 | MN413534.1 | Avian_orthoavulavirus_1_isolate_2011-3311-0004              | 2011 | Australia | Class II | VI    | VI.2.1.1.2.2 |
| 990 | MN413535.1 | Avian_orthoavulavirus_1_isolate_2011-3314                   | 2011 | Australia | Class II | VI    | VI.2.1.1.2.2 |
| 991 | MN413536.1 | Avian_orthoavulavirus_1_isolate_2011-3313                   | 2011 | Australia | Class II | VI    | VI.2.1.1.2.2 |
| 992 | MN413537.1 | Avian_orthoavulavirus_1_isolate_2011-3312                   | 2011 | Australia | Class II | VI    | VI.2.1.1.2.2 |
| 993 | MN413538.1 | Avian_orthoavulavirus_1_isolate_2011-3315                   | 2011 | Australia | Class II | VI    | VI.2.1.1.2.2 |
| 994 | MN416768.1 | Avian_orthoavulavirus_1_strain_SpottedDove/China/2008       | 2008 | China     | Class II | IX    | IX           |
| 995 | MN422262.1 | Avian_orthoavulavirus_1_isolate_Pg/IR/AMMM160/2019          | 2019 | Iran      | Class II | VI    | VI.2.1.2     |
| 996 | MN462666.1 | Avian_orthoavulavirus_1_isolate_2011-3132-3                 | 2011 | Australia | Class II | VI    | VI.2.1.1.2.2 |
| 997 | MN477454.1 | Pigeon_paramyxovirus_1_strain_Pi/CH/GXG44/2018              | 2018 | China     | Class II | VI    | VI.2.1.1.2.1 |
| 998 | MN519685.1 | Avian_orthoavulavirus_1_strain_NDV/Egypt/P/MR82/2018        | 2018 | Egypt     | Class II | XVIII | XVIII.2      |
| 999 | MN519686.1 | Avian_orthoavulavirus_1_strain_NDV/Egypt/P/MR84/2018        | 2018 | Egypt     | Class II | XVIII | XVIII.2      |

|      |            |                                                            |      |        |          |     |              |
|------|------------|------------------------------------------------------------|------|--------|----------|-----|--------------|
| 1000 | MN610433.1 | Pigeon_paramyxovirus_1_isolate_R1/Dakahlia/2015            | 2015 | Egypt  | Class II | XXI | XXI.1.1      |
| 1001 | MN610434.1 | Pigeon_paramyxovirus_1_isolate_R6/Dakahlia/2014            | 2014 | Egypt  | Class II | XXI | XXI.1.1      |
| 1002 | MN610435.1 | Pigeon_paramyxovirus_1_isolate_R7/Dakahlia/2015            | 2015 | Egypt  | Class II | XXI | XXI.1.1      |
| 1003 | MN610436.1 | Pigeon_paramyxovirus_1_isolate_R9/Dakahlia/2018            | 2018 | Egypt  | Class II | XXI | XXI.1.1      |
| 1004 | MN615883.1 | Avian_orthoavulavirus_1_isolate_Pg/IR/AMMM117/2018         | 2018 | Iran   | Class II | I   | I.1.1        |
| 1005 | MN632518.1 | Avian_orthoavulavirus_1_isolate_pigeon/Taiwan/AHRI43/2010  | 2010 | China  | Class II | VI  | VI.2.1.1.2.1 |
| 1006 | MN632519.1 | Avian_orthoavulavirus_1_isolate_pigeon/Taiwan/AHRI68/2012  | 2012 | China  | Class II | VI  | VI.2.1.1.2.1 |
| 1007 | MN632520.1 | Avian_orthoavulavirus_1_isolate_pigeon/Taiwan/AHRI107/2016 | 2016 | China  | Class II | VI  | VI.2.1.1.2.2 |
| 1008 | MN632521.1 | Avian_orthoavulavirus_1_isolate_pigeon/Taiwan/AHRI111/2017 | 2017 | China  | Class II | VI  | VI.2.1.1.2.2 |
| 1009 | MN632537.1 | Avian_orthoavulavirus_1_isolate_dove/Taiwan/AHRI113/2017   | 2017 | China  | Class II | VI  | VI.2.1.1.2.2 |
| 1010 | MN632538.1 | Avian_orthoavulavirus_1_isolate_pigeon/Taiwan/AHRI114/2017 | 2017 | China  | Class II | VI  | VI.2.1.1.2.2 |
| 1011 | MN632539.1 | Avian_orthoavulavirus_1_isolate_dove/Taiwan/AHRI115/2017   | 2017 | China  | Class II | VI  | VI.2.1.1.2.2 |
| 1012 | MN632540.1 | Avian_orthoavulavirus_1_isolate_dove/Taiwan/AHRI116/2017   | 2017 | China  | Class II | VI  | VI.2.1.1.2.2 |
| 1013 | MN632541.1 | Avian_orthoavulavirus_1_isolate_dove/Taiwan/AHRI117/2017   | 2017 | China  | Class II | VI  | VI.2.1.1.2.2 |
| 1014 | MN632542.1 | Avian_orthoavulavirus_1_isolate_dove/Taiwan/AHRI118/2017   | 2017 | China  | Class II | VI  | VI.2.1.1.2.2 |
| 1015 | MN632543.1 | Avian_orthoavulavirus_1_isolate_dove/Taiwan/AHRI120/2017   | 2017 | China  | Class II | VI  | VI.2.1.1.2.2 |
| 1016 | MN632544.1 | Avian_orthoavulavirus_1_isolate_pigeon/Taiwan/AHRI121/2017 | 2017 | China  | Class II | VI  | VI.2.1.1.2.2 |
| 1017 | MN632545.1 | Avian_orthoavulavirus_1_isolate_dove/Taiwan/AHRI123/2017   | 2017 | China  | Class II | VI  | VI.2.1.1.2.2 |
| 1018 | MN632547.1 | Avian_orthoavulavirus_1_isolate_dove/Taiwan/AHRI126/2017   | 2017 | China  | Class II | VI  | VI.2.1.1.2.2 |
| 1019 | MN632548.1 | Avian_orthoavulavirus_1_isolate_pigeon/Taiwan/AHRI133/2018 | 2018 | China  | Class II | VI  | VI.2.1.1.2.2 |
| 1020 | MN636822.1 | Avian_orthoavulavirus_1_isolate_Pg/IR/AMMM168/2019         | 2019 | Iran   | Class II | XXI | XXI.1.1      |
| 1021 | MN700940.1 | Pigeon_paramyxovirus_1_isolate_Pi/CH/YQ/2012               | 2012 | China  | Class II | VI  | VI.2.1.1.2.2 |
| 1022 | MN830309.1 | UNVERIFIED:_Pigeon_paramyxovirus_1_isolate_pi/TR/219F      | 2014 | Turkey | Class II | VI  | VI.2.1.1.2.2 |
| 1023 | MN830310.1 | UNVERIFIED:_Pigeon_paramyxovirus_1_isolate_pi/TR/220F      | 2014 | Turkey | Class II | VI  | VI.2.1.1.2.2 |
| 1024 | MN830311.1 | UNVERIFIED:_Pigeon_paramyxovirus_1_isolate_pi/TR/222F      | 2014 | Turkey | Class II | VI  | VI.2.1.1.2.2 |
| 1025 | MN862497.1 | Pigeon_paramyxovirus_1_strain_Pigeon/Beijing/BJ96/1996     | 1996 | China  | Class II | VI  | VI.2.2.2     |

|      |            |                                                                    |      |             |          |     |              |
|------|------------|--------------------------------------------------------------------|------|-------------|----------|-----|--------------|
| 1026 | MN862498.1 | Pigeon_paramyxovirus_1_strain_Pigeon/Shandong/JN08/2008            | 2008 | China       | Class II | VII | VII.1.1      |
| 1027 | MN862499.1 | Pigeon_paramyxovirus_1_strain_Pigeon/Shandong/TA14/2014            | 2014 | China       | Class II | VI  | VI.2.1.1.2.1 |
| 1028 | MN862500.1 | Pigeon_paramyxovirus_1_strain_Pigeon/Shandong/PP09/2009            | 2009 | China       | Class II | VI  | VI.2.2.2     |
| 1029 | MN862501.1 | Pigeon_paramyxovirus_1_strain_Pigeon/Shandong/TA13/2013            | 2013 | China       | Class II | VI  | VI.2.1.1.2.1 |
| 1030 | MN862502.1 | Pigeon_paramyxovirus_1_strain_Pigeon/Shandong/C9/2013              | 2013 | China       | Class II | VI  | VI.2.2.2     |
| 1031 | MN862503.1 | Pigeon_paramyxovirus_1_strain_Pigeon/Shandong/LCE4/2016            | 2016 | China       | Class II | VI  | VI.2.2.2     |
| 1032 | MN862504.1 | Pigeon_paramyxovirus_1_strain_Pigeon/Shandong/LC/2017              | 2017 | China       | Class II | VI  | VI.2.2.2     |
| 1033 | MN862505.1 | Pigeon_paramyxovirus_1_strain_Pigeon/Shandong/3P3/2018             | 2018 | China       | Class II | VI  | VI.2.1.1.2.2 |
| 1034 | MN862506.1 | Pigeon_paramyxovirus_1_strain_Pigeon/Shandong/190610-2/2019        | 2019 | China       | Class II | VI  | VI.2.1.1.2.2 |
| 1035 | MN893303.1 | Avian_orthoavulavirus_1_strain_pigeon/Guangdong/GZ08/2017          | 2017 | China       | Class II | VI  | VI.2.1.1.2.2 |
| 1036 | MN893304.1 | Avian_orthoavulavirus_1_strain_pigeon/Guangdong/SZ12/2018          | 2018 | China       | Class II | VI  | VI.2.1.1.2.2 |
| 1037 | MN893305.1 | Avian_orthoavulavirus_1_strain_pigeon/Guangdong/HY25/2019          | 2019 | China       | Class II | I   | I.1.1        |
| 1038 | MN953614.1 | Avian_orthoavulavirus_1_strain_pigeon/Jiangsu/2453/2018            | 2018 | China       | Class II | VI  | VI.2.1.1.2.2 |
| 1039 | MN953615.1 | Avian_orthoavulavirus_1_strain_pigeon/Ningxia/2364/2018            | 2018 | China       | Class II | VI  | VI.2.1.1.2.2 |
| 1040 | MN953616.1 | Avian_orthoavulavirus_1_strain_pigeon/Jiangsu/1427/2019            | 2019 | China       | Class II | VI  | VI.2.1.1.2.2 |
| 1041 | MN953617.1 | Avian_orthoavulavirus_1_strain_pigeon/Shanghai/1024/2019           | 2019 | China       | Class II | VI  | VI.2.1.1.2.2 |
| 1042 | MN953618.1 | Avian_orthoavulavirus_1_strain_pigeon/Sichuan/1433/2019            | 2019 | China       | Class II | VI  | VI.2.1.1.2.2 |
| 1043 | MT081321.1 | Avian_orthoavulavirus_1_isolate_KZ/Zhambyl/32/2014                 | 2014 | Zhambyl     | Class II | XXI | XXI.1.1      |
| 1044 | MT108196.1 | Avian_orthoavulavirus_1_isolate_AOAV-1/pigeon/Eg/Q/F-VI/2009       | 2009 | Egypt       | Class II | XXI | XXI.1.2      |
| 1045 | MT120189.1 | Avian_orthoavulavirus_1_isolate_8_precursor                        | 2011 | China       | Class II | VI  | VI.2.2.2     |
| 1046 | MT120191.1 | Avian_orthoavulavirus_1_isolate_10_precursor                       | 2009 | China       | Class II | VI  | VI.2.2.2     |
| 1047 | MT120200.1 | Avian_orthoavulavirus_1_isolate_34_precursor                       | 2018 | China       | Class II | II  | II           |
| 1048 | MT155812.1 | Avian_orthoavulavirus_1_isolate_Pigeon/Philippines/2017/RPG17KVG10 | 2017 | Philippines | Class II | VI  | VI.2.1.1.1   |
| 1049 | MT161597.1 | Avian_orthoavulavirus_1_strain_pi/CH/GXP22/2000                    | 2000 | China       | Class II | VI  | VI.2.1.1.2.1 |
| 1050 | MT161598.1 | Avian_orthoavulavirus_1_strain_pi/CH/GX0019/2012                   | 2012 | China       | Class II | VI  | VI.2.1.1.2.2 |
| 1051 | MT274648.1 | Avian_orthoavulavirus_1_isolate_108/MIB/2014                       | 2014 | India       | Class II | XXI | XXI.1.2      |

|      |            |                                                                 |      |            |          |      |              |
|------|------------|-----------------------------------------------------------------|------|------------|----------|------|--------------|
| 1052 | MT362716.1 | Avian_orthoavulavirus_1_isolate_P1                              | 2017 | India      | Class II | XIII | XIII.2.2     |
| 1053 | MT487719.1 | Pigeon_paramyxovirus_1_isolate_pigeon/Iran/UT_EGV_1/2018        | 2018 | Iran       | Class II | XXI  | XXI.1.1      |
| 1054 | MT487720.1 | Pigeon_paramyxovirus_1_isolate_pigeon/Iran/UT_EGV_2/2018        | 2018 | Iran       | Class II | XXI  | XXI.1.1      |
| 1055 | MT487721.1 | Pigeon_paramyxovirus_1_isolate_pigeon/Iran/UT_EGV_3/2018        | 2018 | Iran       | Class II | XXI  | XXI.1.1      |
| 1056 | MT487722.1 | Pigeon_paramyxovirus_1_isolate_pigeon/Iran/UT_EGV_4/2018        | 2018 | Iran       | Class II | XXI  | XXI.1.2      |
| 1057 | MT487723.1 | Pigeon_paramyxovirus_1_isolate_pigeon/Iran/UT_EGV_5/2018        | 2018 | Iran       | Class II | XXI  | XXI.1.1      |
| 1058 | MT487724.1 | Pigeon_paramyxovirus_1_isolate_pigeon/Iran/UT_EGV_6/2018        | 2018 | Iran       | Class II | XXI  | XXI.1.1      |
| 1059 | MT487725.1 | Pigeon_paramyxovirus_1_isolate_pigeon/Iran/UT_EGV_7/2018        | 2018 | Iran       | Class II | XXI  | XXI.1.1      |
| 1060 | MT487726.1 | Pigeon_paramyxovirus_1_isolate_pigeon/Iran/UT_EGV_8/2018        | 2018 | Iran       | Class II | XXI  | XXI.1.1      |
| 1061 | MT487727.1 | Pigeon_paramyxovirus_1_isolate_pigeon/Iran/UT_EGV_9/2018        | 2018 | Iran       | Class II | XXI  | XXI.1.1      |
| 1062 | MT487728.1 | Pigeon_paramyxovirus_1_isolate_pigeon/Iran/UT_EGV_10/2018       | 2018 | Iran       | Class II | XXI  | XXI.1.1      |
| 1063 | MT524978.1 | Avian_orthoavulavirus_1_isolate_NDV/pigeon/Bangladesh/P13C/2019 | 2019 | Bangladesh | Class II | XX   | XX           |
| 1064 | MT524979.1 | Avian_orthoavulavirus_1_isolate_NDV/pigeon/Bangladesh/P11C/2019 | 2019 | Bangladesh | Class II | XXI  | XXI.1.2      |
| 1065 | MT524980.1 | Avian_orthoavulavirus_1_isolate_NDV/pigeon/Bangladesh/P14C/2019 | 2019 | Bangladesh | Class II | XXI  | XXI.1.2      |
| 1066 | MT524981.1 | Avian_orthoavulavirus_1_isolate_NDV/pigeon/Bangladesh/P21C/2019 | 2019 | Bangladesh | Class II | XXI  | XXI.1.2      |
| 1067 | MT524982.1 | Avian_orthoavulavirus_1_isolate_NDV/pigeon/Bangladesh/P32C/2019 | 2019 | Bangladesh | Class II | XXI  | XXI.1.2      |
| 1068 | MT524983.1 | Avian_orthoavulavirus_1_isolate_NDV/pigeon/Bangladesh/P34C/2019 | 2019 | Bangladesh | Class II | XXI  | XXI.1.2      |
| 1069 | MT524984.1 | Avian_orthoavulavirus_1_isolate_NDV/pigeon/Bangladesh/P37C/2019 | 2019 | Bangladesh | Class II | XX   | XX           |
| 1070 | MT524985.1 | Avian_orthoavulavirus_1_isolate_NDV/pigeon/Bangladesh/P46C/2019 | 2019 | Bangladesh | Class II | XX   | XX           |
| 1071 | MT524986.1 | Avian_orthoavulavirus_1_isolate_NDV/pigeon/Bangladesh/P56C/2019 | 2019 | Bangladesh | Class II | XX   | XX           |
| 1072 | MT524987.1 | Avian_orthoavulavirus_1_isolate_NDV/pigeon/Bangladesh/P57C/2019 | 2019 | Bangladesh | Class II | XX   | XX           |
| 1073 | MT524988.1 | Avian_orthoavulavirus_1_isolate_NDV/pigeon/Bangladesh/P63C/2019 | 2019 | Bangladesh | Class II | XX   | XX           |
| 1074 | MT811571.1 | Avian_orthoavulavirus_1_isolate_JS/03/11/Pi                     | 2011 | China      | Class II | VI   | VI.2.1.1.2.2 |
| 1075 | MT811572.1 | Avian_orthoavulavirus_1_isolate_ZJ/01/13/Pi                     | 2013 | China      | Class II | VI   | VI.2.1.1.2.2 |
| 1076 | MT811573.1 | Avian_orthoavulavirus_1_isolate_ZJ/02/13/Pi                     | 2013 | China      | Class II | VI   | VI.2.1.1.2.2 |
| 1077 | MT811574.1 | Avian_orthoavulavirus_1_isolate_ZJ/03/13/Pi                     | 2013 | China      | Class II | VI   | VI.2.1.1.2.2 |

|      |            |                                                                     |      |          |          |    |              |
|------|------------|---------------------------------------------------------------------|------|----------|----------|----|--------------|
| 1078 | MT811576.1 | Avian_orthoavulavirus_1_isolate_JS/03/15/Pi                         | 2015 | China    | Class II | VI | VI.2.1.1.2.2 |
| 1079 | MT811578.1 | Avian_orthoavulavirus_1_isolate_JS/09/16/Pi                         | 2016 | China    | Class II | VI | VI.2.1.1.2.2 |
| 1080 | MT811579.1 | Avian_orthoavulavirus_1_isolate_SD/10/16/Pi                         | 2016 | China    | Class II | VI | VI.2.1.1.2.2 |
| 1081 | MT811580.1 | Avian_orthoavulavirus_1_isolate_JS/06/17/Pi                         | 2017 | China    | Class II | VI | VI.2.1.1.2.2 |
| 1082 | MT811582.1 | Avian_orthoavulavirus_1_isolate_JS/05/19/Pi                         | 2019 | China    | Class II | VI | VI.2.1.1.2.2 |
| 1083 | MT811583.1 | Avian_orthoavulavirus_1_isolate_JS/06/19/Pi                         | 2019 | China    | Class II | VI | VI.2.1.1.2.2 |
| 1084 | MT811584.1 | Avian_orthoavulavirus_1_isolate_AH/01/19/Pi                         | 2019 | China    | Class II | VI | VI.2.1.1.2.2 |
| 1085 | MT811585.1 | Avian_orthoavulavirus_1_isolate_AH/02/19/Pi                         | 2019 | China    | Class II | VI | VI.2.1.1.2.2 |
| 1086 | MT811586.1 | Avian_orthoavulavirus_1_isolate_SD/09/19/Pi                         | 2019 | China    | Class II | VI | VI.2.1.1.2.2 |
| 1087 | MT811587.1 | Avian_orthoavulavirus_1_isolate_JS/12/19/Pi                         | 2019 | China    | Class II | VI | VI.2.1.1.2.2 |
| 1088 | MT811588.1 | Avian_orthoavulavirus_1_isolate_JS/13/19/Pi                         | 2019 | China    | Class II | VI | VI.2.1.1.2.2 |
| 1089 | MT920212.1 | Avian_orthoavulavirus_1_isolate_Pigeon/Pakistan/Lahore/AW-1021/2019 | 2019 | Pakistan | Class II | XX | XX           |
| 1090 | MT920213.1 | Avian_orthoavulavirus_1_isolate_Pigeon/Pakistan/Lahore/AW-1022/2019 | 2019 | Pakistan | Class II | XX | XX           |
| 1091 | MT920214.1 | Avian_orthoavulavirus_1_isolate_Pigeon/Pakistan/Lahore/AW-1023/2019 | 2019 | Pakistan | Class II | XX | XX           |
| 1092 | MW147625.1 | Avian_orthoavulavirus_1_strain_pigeon/China/TJ2017                  | 2017 | China    | Class II | VI | VI.2.1.1.2.2 |
| 1093 | MW147626.1 | Avian_orthoavulavirus_1_strain_pigeon/China/BJ2018                  | 2018 | China    | Class II | VI | VI.2.1.1.2.2 |
| 1094 | MW271783.1 | Avian_orthoavulavirus_1_isolate_JS/23/11/Pi                         | 2011 | China    | Class II | VI | VI.2.1.1.2.2 |
| 1095 | MW271784.1 | Avian_orthoavulavirus_1_isolate_ZJ_03_13_Pi                         | 2013 | China    | Class II | VI | VI.2.1.1.2.2 |
| 1096 | MW271785.1 | Avian_orthoavulavirus_1_isolate_JS/01/15/Pi                         | 2015 | China    | Class II | VI | VI.2.1.1.2.2 |
| 1097 | MW271786.1 | Avian_orthoavulavirus_1_isolate_AH/06/16/Pi                         | 2016 | China    | Class II | VI | VI.2.1.1.2.2 |
| 1098 | MW271788.1 | Avian_orthoavulavirus_1_isolate_GS/12/17/Pi                         | 2017 | China    | Class II | VI | VI.2.1.1.2.2 |
| 1099 | MW271789.1 | Avian_orthoavulavirus_1_isolate_AH/01/20/Pi                         | 2020 | China    | Class II | VI | VI.2.1.1.2.2 |
| 1100 | MW271790.1 | Avian_orthoavulavirus_1_isolate_JS/01/20/Pi                         | 2020 | China    | Class II | VI | VI.2.1.1.2.2 |
| 1101 | MW271791.1 | Avian_orthoavulavirus_1_isolate_JS/06/20/Pi                         | 2020 | China    | Class II | VI | VI.2.1.1.2.2 |
| 1102 | MW271792.1 | Avian_orthoavulavirus_1_isolate_JS/07/20/Pi                         | 2020 | China    | Class II | VI | VI.2.1.1.2.2 |
| 1103 | MW412840.1 | Avian_orthoavulavirus_1_strain_VI-HZ                                | 2017 | China    | Class II | VI | VI.2.2.2     |

|      |            |                                                                          |      |         |          |       |              |
|------|------------|--------------------------------------------------------------------------|------|---------|----------|-------|--------------|
| 1104 | MZ029051.1 | Avian_orthoavulavirus_1_isolate_NDV-Pigeon-Sharkia-ZAG.UNI-9-2020        | 2020 | USA     | Class II | VII   | VII.1.1      |
| 1105 | MZ029053.1 | Avian_orthoavulavirus_1_isolate_NDV/Pigeon/Egypt/Cairo-ZAG.UNI-19/2019   | 2019 | Egypt   | Class II | XVIII | XVIII.2      |
| 1106 | MZ101341.1 | Avian_orthoavulavirus_1_isolate_pigeon/Ukraine/Kharkiv/Kuksov/13-05/2014 | 2014 | Ukraine | Class II | XXI   | XXI.1.1      |
| 1107 | MZ101342.1 | Avian_orthoavulavirus_1_isolate_pigeon/Ukraine/Kharkiv/Petruk/15-01/2015 | 2015 | Ukraine | Class II | VI    | VI.2.1.1.2.2 |
| 1108 | MZ101344.1 | Avian_orthoavulavirus_1_isolate_pigeon/Ukraine/Doneck/10/26-6/2008       | 2008 | Ukraine | Class II | II    | II           |
| 1109 | MZ223436.1 | Avian_orthoavulavirus_1_isolate_JS/02/20/Pi                              | 2020 | China   | Class II | VI    | VI.2.1.1.2.2 |
| 1110 | MZ223437.1 | Avian_orthoavulavirus_1_isolate_HN/01/20/Pi                              | 2020 | China   | Class II | VI    | VI.2.1.1.2.2 |
| 1111 | MZ223438.1 | Avian_orthoavulavirus_1_isolate_HN/02/20/Pi                              | 2020 | China   | Class II | VI    | VI.2.1.1.2.2 |
| 1112 | MZ277620.1 | Avian_orthoavulavirus_1_isolate_Pigeon/Tianjin/0044/2019                 | 2019 | China   | Class II | VI    | VI.2.1.1.2.2 |
| 1113 | MZ277621.1 | Avian_orthoavulavirus_1_isolate_Pigeon/Tianjin/0054/2019                 | 2019 | China   | Class II | VI    | VI.2.1.1.2.2 |
| 1114 | MZ277622.1 | Avian_orthoavulavirus_1_isolate_Pigeon/Beijing/0072/2019                 | 2019 | China   | Class II | VI    | VI.2.1.1.2.2 |
| 1115 | MZ277623.1 | Avian_orthoavulavirus_1_isolate_Pigeon/China/su/2019                     | 2019 | China   | Class II | VI    | VI.2.1.1.2.1 |
| 1116 | MZ306211.1 | Avian_orthoavulavirus_1_strain_pigeon/China/GXD12/2000                   | 2000 | China   | Class II | I     | I.1.1        |
| 1117 | MZ306219.1 | Avian_orthoavulavirus_1_strain_pigeon/China/GXD27/2018                   | 2018 | China   | Class II | VI    | VI.2.1.1.2.1 |
| 1118 | MZ306222.1 | Avian_orthoavulavirus_1_strain_Turtle_dove/China/GX11/2018               | 2018 | China   | Class II | VI    | VI.2.1.1.2.2 |
| 1119 | MZ363634.1 | Avian_orthoavulavirus_1_strain_Pigeon/China/GX03/2017                    | 2017 | China   | Class II | VI    | VI.2.1.1.2.2 |
| 1120 | MZ395248.1 | Avian_orthoavulavirus_1_strain_Pigeon/China/GX04/2016                    | 2016 | China   | Class II | VI    | VI.2.1.1.2.2 |
| 1121 | MZ395249.1 | Avian_orthoavulavirus_1_strain_Turtle_dove/China/GX05/2017               | 2017 | China   | Class II | VI    | VI.2.1.1.2.2 |
| 1122 | MZ395250.1 | Avian_orthoavulavirus_1_strain_Turtle_dove/China/GX06/2016               | 2016 | China   | Class II | VI    | VI.2.1.1.2.2 |
| 1123 | MZ395251.1 | Avian_orthoavulavirus_1_strain_Pigeon/China/GX07/2017                    | 2017 | China   | Class II | VI    | VI.2.1.1.2.2 |
| 1124 | MZ400779.1 | Avian_orthoavulavirus_1_strain_Turtle_dove/China/GX08/2016               | 2016 | China   | Class II | VI    | VI.2.1.1.2.2 |
| 1125 | MZ400780.1 | Avian_orthoavulavirus_1_strain_Turtle_dove/China/GX09/2016               | 2016 | China   | Class II | VI    | VI.2.1.1.2.2 |
| 1126 | MZ405131.1 | Avian_orthoavulavirus_1_strain_Spotted_dove/China/GX07/2019              | 2019 | China   | Class II | VI    | VI.2.1.1.2.2 |
| 1127 | MZ405134.1 | Avian_orthoavulavirus_1_strain_pigeon/China/GXD17/2006                   | 2006 | China   | Class II | I     | I.1.1        |
| 1128 | MZ405135.1 | Avian_orthoavulavirus_1_strain_pigeon/China/GXD31/2016                   | 2016 | China   | Class II | VI    | VI.2.1.1.2.1 |
| 1129 | MZ405137.1 | Avian_orthoavulavirus_1_strain_pigeon/China/GXD28/2020                   | 2020 | China   | Class II | VI    | VI.2.1.1.2.2 |

|      |            |                                                                             |      |        |          |     |              |
|------|------------|-----------------------------------------------------------------------------|------|--------|----------|-----|--------------|
| 1130 | MZ409510.1 | Avian_orthoavulavirus_1_strain_VI-NJ                                        | 2006 | China  | Class II | VI  | VI.2.1.1.2.1 |
| 1131 | MZ458602.1 | Avian_orthoavulavirus_1_isolate_NDV/pigeon/SP-Brazil/CCZ002/2019            | 2019 | Brazil | Class II | VI  | VI.2.1.2     |
| 1132 | MZ620686.1 | Avian_orthoavulavirus_1_strain_Spotted_dove/China/GX08/2017                 | 2017 | China  | Class II | VI  | VI.2.1.1.2.2 |
| 1133 | MZ620687.1 | Avian_orthoavulavirus_1_strain_Spotted_dove/China/GX09/2017                 | 2017 | China  | Class II | VI  | VI.2.1.1.2.2 |
| 1134 | MZ620688.1 | Avian_orthoavulavirus_1_strain_Turtle_dove/China/GX10/2018                  | 2018 | China  | Class II | VI  | VI.2.1.1.2.2 |
| 1135 | MZ620689.1 | Avian_orthoavulavirus_1_strain_Pigeon/China/GX12/2019                       | 2019 | China  | Class II | VI  | VI.2.1.1.2.1 |
| 1136 | MZ620690.1 | Avian_orthoavulavirus_1_strain_Spotted_dove/China/GX15/2018                 | 2018 | China  | Class II | VI  | VI.2.1.1.2.2 |
| 1137 | MZ620693.1 | Avian_orthoavulavirus_1_strain_Turtle_dove/China/GX16/2018                  | 2018 | China  | Class II | VI  | VI.2.1.1.2.2 |
| 1138 | MZ620694.1 | Avian_orthoavulavirus_1_strain_Turtle_dove/China/GX17/2018                  | 2018 | China  | Class II | VI  | VI.2.1.1.2.2 |
| 1139 | MZ620696.1 | Avian_orthoavulavirus_1_strain_Spotted_dove/China/GX06/2019                 | 2019 | China  | Class II | VI  | VI.2.1.1.2.2 |
| 1140 | MZ620698.1 | Avian_orthoavulavirus_1_strain_Turtle_dove/China/GX11/2019                  | 2019 | China  | Class II | VI  | VI.2.1.1.2.2 |
| 1141 | MZ736924.1 | Newcastle_disease_virus_class_1_isolate_PI/CH/LFJ/277/2017                  | 2017 | China  | Class I  | 1   | 1.1.2        |
| 1142 | MZ737065.1 | Newcastle_disease_virus_class_1_isolate_PI/CH/LNX/38/2018                   | 2018 | China  | Class I  | 1   | 1.1.2        |
| 1143 | MZ737079.1 | Newcastle_disease_virus_class_1_isolate_PI/CH/LSC/309/2018                  | 2018 | China  | Class I  | 1   | 1.1.2        |
| 1144 | MZ737087.1 | Newcastle_disease_virus_class_1_isolate_PI/CH/LSH/101/2018                  | 2018 | China  | Class I  | 1   | 1.1.2        |
| 1145 | MZ802821.1 | Avian_orthoavulavirus_1_isolate_APMV-1/dove/Taiwan/AHRI144/2019             | 2019 | China  | Class II | VI  | VI.2.1.1.2.2 |
| 1146 | MZ802822.1 | Avian_orthoavulavirus_1_isolate_APMV-1/pigeon/Taiwan/AHRI147/2019           | 2019 | China  | Class II | VI  | VI.2.1.1.2.2 |
| 1147 | MZ928457.1 | Avian_orthoavulavirus_1_isolate_NDV/Pigeon/Sudan/Khartoum-A19/2017          | 2017 | Sudan  | Class II | XXI | XXI.1.1      |
| 1148 | OK135954.1 | Avian_orthoavulavirus_1_isolate_NDV/Pigeon/Sudan/Khartoum-A2/               | 2017 | Sudan  | Class II | VII | VII.1.1      |
| 1149 | OL513713.1 | Avian_orthoavulavirus_1_isolate_pigeon/Shanghai/2095/2017                   | 2017 | China  | Class I  | 1   | 1.1.2        |
| 1150 | OL513763.1 | Avian_orthoavulavirus_1_isolate_pigeon/Jiangxi/2360/2017                    | 2017 | China  | Class I  | 1   | 1.1.2        |
| 1151 | OL513985.1 | Avian_orthoavulavirus_1_isolate_pigeon/Jiangxi/1027/2018                    | 2018 | China  | Class I  | 1   | 1.1.2        |
| 1152 | OL513986.1 | Avian_orthoavulavirus_1_isolate_pigeon/Jiangxi/1419/2018                    | 2018 | China  | Class I  | 1   | 1.1.2        |
| 1153 | OL518991.1 | Avian_orthoavulavirus_1_isolate_APMV-1/Rock_Dove/NYC/USA/NYCVH/21-0109/2021 | 2021 | USA    | Class II | VI  | VI.2.1.1.1   |
| 1154 | OL518992.1 | Avian_orthoavulavirus_1_isolate_APMV-1/Rock_Dove/NYC/USA/NYCVH/21-0052/2021 | 2021 | USA    | Class II | VI  | VI.2.1.1.1   |
| 1155 | OL547962.1 | Avian_orthoavulavirus_1_strain_Pigeon/Jiangsu/1482/2011                     | 2011 | China  | Class I  | 1   | 1.1.2        |



|      |            |                                                             |      |       |          |    |              |
|------|------------|-------------------------------------------------------------|------|-------|----------|----|--------------|
| 1156 | OL548139.1 | Avian_orthoavulavirus_1_strain_Pigeon/Shanxi/2054/2012      | 2012 | China | Class I  | 1  | 1.1.2        |
| 1157 | OL548140.1 | Avian_orthoavulavirus_1_strain_Pigeon/Shanxi/2081/2012      | 2012 | China | Class I  | 1  | 1.1.2        |
| 1158 | OL548141.1 | Avian_orthoavulavirus_1_strain_Pigeon/Shanxi/2082/2012      | 2012 | China | Class I  | 1  | 1.1.2        |
| 1159 | OL548142.1 | Avian_orthoavulavirus_1_strain_Pigeon/Shanxi/2088/2012      | 2012 | China | Class I  | 1  | 1.1.2        |
| 1160 | OL548143.1 | Avian_orthoavulavirus_1_strain_Pigeon/Shanxi/2122/2012      | 2012 | China | Class I  | 1  | 1.1.2        |
| 1161 | OL548144.1 | Avian_orthoavulavirus_1_strain_Pigeon/Shanxi/2125/2012      | 2012 | China | Class I  | 1  | 1.1.2        |
| 1162 | OL548145.1 | Avian_orthoavulavirus_1_strain_Pigeon/Shanxi/2187/2012      | 2012 | China | Class I  | 1  | 1.1.2        |
| 1163 | OL548146.1 | Avian_orthoavulavirus_1_strain_Pigeon/Shanxi/2188/2012      | 2012 | China | Class I  | 1  | 1.1.2        |
| 1164 | OL548164.1 | Avian_orthoavulavirus_1_strain_Pigeon/Anhui/1151/2013       | 2013 | China | Class I  | 1  | 1.1.2        |
| 1165 | OL548165.1 | Avian_orthoavulavirus_1_strain_Pigeon/Anhui/1155/2013       | 2013 | China | Class I  | 1  | 1.1.2        |
| 1166 | OL548166.1 | Avian_orthoavulavirus_1_strain_Pigeon/Anhui/2195/2013       | 2013 | China | Class I  | 1  | 1.1.2        |
| 1167 | OL548167.1 | Avian_orthoavulavirus_1_strain_Pigeon_water/Anhui/2224/2013 | 2013 | China | Class I  | 1  | 1.1.2        |
| 1168 | OL548168.1 | Avian_orthoavulavirus_1_strain_Pigeon_water/Anhui/2259/2013 | 2013 | China | Class I  | 1  | 1.1.2        |
| 1169 | OL548180.1 | Avian_orthoavulavirus_1_strain_Pigeon/Guizhou/2038/2013     | 2013 | China | Class I  | 1  | 1.1.2        |
| 1170 | OL548205.1 | Avian_orthoavulavirus_1_strain_Pigeon/Henan/2047/2013       | 2013 | China | Class I  | 1  | 1.1.2        |
| 1171 | OL548222.1 | Avian_orthoavulavirus_1_strain_Pigeon/Hubei/2200/2013       | 2013 | China | Class I  | 1  | 1.1.2        |
| 1172 | OL548317.1 | Avian_orthoavulavirus_1_strain_Pigeon/Sichuan/2155/2013     | 2013 | China | Class I  | 1  | 1.1.2        |
| 1173 | OL548365.1 | Avian_orthoavulavirus_1_strain_Pigeon/Chongqing/2129/2013   | 2013 | China | Class I  | 1  | 1.1.2        |
| 1174 | OL548432.1 | Avian_orthoavulavirus_1_strain_Pigeon/Guizhou/1044/2014     | 2014 | China | Class I  | 1  | 1.1.2        |
| 1175 | OL548679.1 | Avian_orthoavulavirus_1_strain_Pigeon/Shanghai/1056/2014    | 2014 | China | Class I  | 1  | 1.1.2        |
| 1176 | OL548829.1 | Avian_orthoavulavirus_1_strain_Pigeon/Shanghai/3855/2014    | 2014 | China | Class I  | 1  | 1.1.2        |
| 1177 | OL580885.1 | Avian_orthoavulavirus_1_isolate_pigeon/Jiangxi/2399/2019    | 2019 | China | Class I  | 1  | 1.1.2        |
| 1178 | OL580912.1 | Avian_orthoavulavirus_1_isolate_pigeon/Jiangxi/2431/2019    | 2019 | China | Class I  | 1  | 1.1.2        |
| 1179 | OL581424.1 | Avian_orthoavulavirus_1_isolate_pigeon/Jiangxi/2226/2020    | 2020 | China | Class I  | 1  | 1.1.2        |
| 1180 | OM258694.1 | Avian_orthoavulavirus_1_strain_pigeon/Fujian/2121/2020      | 2020 | China | Class II | VI | VI.2.1.1.2.2 |
| 1181 | OM258695.1 | Avian_orthoavulavirus_1_strain_pigeon/Jiangxi/2176/2020     | 2020 | China | Class II | VI | VI.2.1.1.2.2 |

|      |            |                                                                 |      |          |          |    |              |
|------|------------|-----------------------------------------------------------------|------|----------|----------|----|--------------|
| 1182 | OM258696.1 | Avian_orthoavulavirus_1_strain_pigeon/Anhui/1350/2021           | 2021 | China    | Class II | VI | VI.2.1.1.2.2 |
| 1183 | OM258697.1 | Avian_orthoavulavirus_1_strain_pigeon/Fujian/1394/2021          | 2019 | China    | Class II | VI | VI.2.1.1.2.2 |
| 1184 | OM418380.1 | Avian_orthoavulavirus_1_isolate_MP003                           | 2018 | Brazil   | Class II | VI | VI.2.1.2     |
| 1185 | OM522660.1 | Avian_orthoavulavirus_1_isolate_pigeon/Pakistan/Rawalpindi/2015 | 2015 | Pakistan | Class II | XX | XX           |
| 1186 | OM640464.1 | Pigeon_paramyxovirus_1_strain_PPMV-1/pigeon/Gansu/China/02/2020 | 2020 | China    | Class II | VI | VI.2.1.1.2.2 |
| 1187 | ON512717.1 | Pigeon_paramyxovirus_1_isolate_D1705329                         | 2017 | USA      | Class II | VI | VI.2.1.1.1   |
| 1188 | ON512718.1 | Pigeon_paramyxovirus_1_isolate_K1300482                         | 2013 | USA      | Class II | VI | VI.2.1.1.1   |
| 1189 | ON512719.1 | Pigeon_paramyxovirus_1_isolate_K1400434                         | 2014 | USA      | Class II | VI | VI.2.1.1.1   |
| 1190 | ON512720.1 | Pigeon_paramyxovirus_1_isolate_K1401255                         | 2014 | USA      | Class II | VI | VI.2.1.1.1   |
| 1191 | ON512721.1 | Pigeon_paramyxovirus_1_isolate_K1401933                         | 2014 | USA      | Class II | VI | VI.2.1.1.1   |
| 1192 | ON512722.1 | Pigeon_paramyxovirus_1_isolate_K1501131                         | 2015 | USA      | Class II | VI | VI.2.1.1.1   |
| 1193 | ON512723.1 | Pigeon_paramyxovirus_1_isolate_K1501454                         | 2015 | USA      | Class II | VI | VI.2.1.1.1   |
| 1194 | ON512724.1 | Pigeon_paramyxovirus_1_isolate_K1600456                         | 2016 | USA      | Class II | VI | VI.2.1.1.1   |
| 1195 | ON512725.1 | Pigeon_paramyxovirus_1_isolate_K1600553                         | 2016 | USA      | Class II | VI | VI.2.1.1.1   |
| 1196 | ON512726.1 | Pigeon_paramyxovirus_1_isolate_K1600644                         | 2016 | USA      | Class II | VI | VI.2.1.1.1   |
| 1197 | ON512727.1 | Pigeon_paramyxovirus_1_isolate_K1600859                         | 2016 | USA      | Class II | VI | VI.2.1.1.1   |
| 1198 | ON512728.1 | Pigeon_paramyxovirus_1_isolate_K1602689                         | 2016 | USA      | Class II | VI | VI.2.1.1.1   |
| 1199 | ON512729.1 | Pigeon_paramyxovirus_1_isolate_K1603086                         | 2016 | USA      | Class II | VI | VI.2.1.1.1   |
| 1200 | ON512730.1 | Pigeon_paramyxovirus_1_isolate_K1700451                         | 2017 | USA      | Class II | VI | VI.2.1.1.1   |
| 1201 | ON512731.1 | Pigeon_paramyxovirus_1_isolate_K1700703                         | 2017 | USA      | Class II | VI | VI.2.1.1.1   |
| 1202 | ON512732.1 | Pigeon_paramyxovirus_1_isolate_K1700817                         | 2017 | USA      | Class II | VI | VI.2.1.1.1   |
| 1203 | ON512733.1 | Pigeon_paramyxovirus_1_isolate_K1700945                         | 2017 | USA      | Class II | VI | VI.2.1.1.1   |
| 1204 | ON512734.1 | Pigeon_paramyxovirus_1_isolate_K1700972                         | 2017 | USA      | Class II | VI | VI.2.1.1.1   |
| 1205 | ON512735.1 | Pigeon_paramyxovirus_1_isolate_K1701944                         | 2017 | USA      | Class II | VI | VI.2.1.1.1   |
| 1206 | ON512736.1 | Pigeon_paramyxovirus_1_isolate_K1702213                         | 2017 | USA      | Class II | VI | VI.2.1.1.1   |
| 1207 | ON512737.1 | Pigeon_paramyxovirus_1_isolate_K1702361                         | 2017 | USA      | Class II | VI | VI.2.1.1.1   |

|      |            |                                                                        |      |           |          |    |              |
|------|------------|------------------------------------------------------------------------|------|-----------|----------|----|--------------|
| 1208 | ON512738.1 | Pigeon_paramyxovirus_1_isolate_K1702469                                | 2017 | USA       | Class II | VI | VI.2.1.1.1   |
| 1209 | ON512739.1 | Pigeon_paramyxovirus_1_isolate_K1801328                                | 2018 | USA       | Class II | VI | VI.2.1.1.1   |
| 1210 | ON512740.1 | Pigeon_paramyxovirus_1_isolate_K1801329                                | 2018 | USA       | Class II | VI | VI.2.1.1.1   |
| 1211 | ON512741.1 | Pigeon_paramyxovirus_1_isolate_K1801495                                | 2018 | USA       | Class II | VI | VI.2.1.1.1   |
| 1212 | ON512742.1 | Pigeon_paramyxovirus_1_isolate_K1802082                                | 2018 | USA       | Class II | VI | VI.2.1.1.1   |
| 1213 | ON512743.1 | Pigeon_paramyxovirus_1_isolate_S1402687                                | 2014 | USA       | Class II | VI | VI.2.1.1.1   |
| 1214 | ON512744.1 | Pigeon_paramyxovirus_1_isolate_S1501211                                | 2015 | USA       | Class II | VI | VI.2.1.1.1   |
| 1215 | ON512745.1 | Pigeon_paramyxovirus_1_isolate_S1700135                                | 2017 | USA       | Class II | VI | VI.2.1.1.1   |
| 1216 | ON512746.1 | Pigeon_paramyxovirus_1_isolate_S1703718                                | 2017 | USA       | Class II | VI | VI.2.1.1.1   |
| 1217 | ON512747.1 | Pigeon_paramyxovirus_1_isolate_S1708149                                | 2017 | USA       | Class II | VI | VI.2.1.1.1   |
| 1218 | ON512748.1 | Pigeon_paramyxovirus_1_isolate_S2002105                                | 2020 | USA       | Class II | VI | VI.2.1.1.1   |
| 1219 | ON512749.1 | Pigeon_paramyxovirus_1_isolate_T1501391                                | 2015 | USA       | Class II | VI | VI.2.1.1.1   |
| 1220 | ON512750.1 | Pigeon_paramyxovirus_1_isolate_T1600201                                | 2016 | USA       | Class II | VI | VI.2.1.1.1   |
| 1221 | ON512751.1 | Pigeon_paramyxovirus_1_isolate_T1800802                                | 2018 | USA       | Class II | VI | VI.2.1.1.1   |
| 1222 | ON637881.1 | Pigeon_paramyxovirus_1_strain_NTU/C239/21                              | 2021 | China     | Class II | VI | VI.2.1.1.2.2 |
| 1223 | ON645962.1 | Avian_orthoavulavirus_1_isolate_AOAV-1/pigeon/Macedonia/230/2008       | 2008 | Macedonia | Class II | VI | VI.2.1.1.2.2 |
| 1224 | ON645964.1 | Avian_orthoavulavirus_1_isolate_AOAV-1/pigeon/Macedonia/232/2008       | 2008 | Macedonia | Class II | VI | VI.2.1.1.2.2 |
| 1225 | ON645965.1 | Avian_orthoavulavirus_1_isolate_AOAV-1/pigeon/Macedonia/234/2007       | 2007 | Macedonia | Class II | VI | VI.2.1.1.2.2 |
| 1226 | ON645966.1 | Avian_orthoavulavirus_1_isolate_AOAV-1/pigeon/Macedonia/415/2011       | 2011 | Macedonia | Class II | VI | VI.2.1.1.2.2 |
| 1227 | ON645967.1 | Avian_orthoavulavirus_1_isolate_AOAV-1/pigeon/Macedonia/419/2011       | 2011 | Macedonia | Class II | VI | VI.2.1.1.2.2 |
| 1228 | ON645968.1 | Avian_orthoavulavirus_1_isolate_AOAV-1/feralpigeon/Macedonia/9701/2012 | 2012 | Macedonia | Class II | VI | VI.2.1.1.2.2 |
| 1229 | ON645969.1 | Avian_orthoavulavirus_1_isolate_AOAV-1/pigeon/Macedonia/1503/2007      | 2007 | Macedonia | Class II | VI | VI.2.1.1.2.2 |
| 1230 | ON645970.1 | Avian_orthoavulavirus_1_isolate_AOAV-1/pigeon/Macedonia/962/2008       | 2008 | Macedonia | Class II | VI | VI.2.1.1.2.2 |
| 1231 | ON645971.1 | Avian_orthoavulavirus_1_isolate_AOAV-1/pigeon/Macedonia/1501/2007      | 2007 | Macedonia | Class II | VI | VI.2.1.1.2.2 |
| 1232 | ON645972.1 | Avian_orthoavulavirus_1_isolate_AOAV-1/pigeon/Macedonia/2810/2010      | 2010 | Macedonia | Class II | VI | VI.2.1.1.2.2 |
| 1233 | ON918567.1 | Avian_orthoavulavirus_1_strain_NDV/P1/22/RSP-2                         | 2022 | India     | Class II | II | II           |

|      |            |                                                                       |      |            |          |     |              |
|------|------------|-----------------------------------------------------------------------|------|------------|----------|-----|--------------|
| 1234 | ON918568.1 | Avian_orthoavulavirus_1_strain_NDV/P2/22/RSP-2                        | 2022 | India      | Class II | II  | II           |
| 1235 | ON918569.1 | Avian_orthoavulavirus_1_strain_NDV/P3/22/RSP-2                        | 2022 | India      | Class II | II  | II           |
| 1236 | ON939087.1 | Pigeon_paramyxovirus_1_strain_Pigeon/HeBei/210818                     | 2021 | China      | Class II | VI  | VI.2.1.1.2.2 |
| 1237 | ON986202.1 | Avian_orthoavulavirus_1_isolate_PPMV-1/pigeon/Switzerl/P147-ND52/2021 | 2021 | Switzerl   | Class II | VI  | VI.2.1.1.2.2 |
| 1238 | ON986203.1 | Avian_orthoavulavirus_1_isolate_PPMV-1/pigeon/Switzerl/P228-ND53/2021 | 2021 | Switzerl   | Class II | VI  | VI.2.1.1.2.2 |
| 1239 | ON986204.1 | Avian_orthoavulavirus_1_isolate_PPMV-1/pigeon/Switzerl/P297-ND54/2021 | 2021 | Switzerl   | Class II | VI  | VI.2.1.1.2.2 |
| 1240 | ON986205.1 | Avian_orthoavulavirus_1_isolate_PPMV-1/pigeon/Switzerl/P382-ND55/2021 | 2021 | Switzerl   | Class II | VI  | VI.2.1.1.2.2 |
| 1241 | ON986206.1 | Avian_orthoavulavirus_1_isolate_PPMV-1/pigeon/Switzerl/V051-1/2022    | 2022 | Switzerl   | Class II | VI  | VI.2.1.1.2.2 |
| 1242 | OP221244.1 | Pigeon_paramyxovirus_1_isolate_Pigeon/Egypt/Qalyubia/Kb1/2020         | 2020 | Egypt      | Class II | XXI | XXI.1.1      |
| 1243 | OP535454.1 | Avian_orthoavulavirus_1_isolate_pi/Pak/Lhr/XXI.1.1/SA_1/2017          | 2017 | Pakistan   | Class II | XXI | XXI.1.1      |
| 1244 | OP535455.1 | Avian_orthoavulavirus_1_isolate_pi/Pak/Lhr/XXI.1.2/SA_2/2017          | 2017 | Pakistan   | Class II | XX  | XX           |
| 1245 | OP641847.1 | Avian_orthoavulavirus_1_isolate_APMV-1/Pigeon/Bangladesh/SG-47/2020   | 2020 | Bangladesh | Class II | XX  | XX           |
| 1246 | OP641848.1 | Avian_orthoavulavirus_1_isolate_APMV-1/Pigeon/Bangladesh/LT-43/2020   | 2020 | Bangladesh | Class II | XX  | XX           |
| 1247 | OP641849.1 | Avian_orthoavulavirus_1_isolate_APMV-1/Pigeon/Bangladesh/SG-57/2021   | 2021 | Bangladesh | Class II | XX  | XX           |
| 1248 | OP751936.1 | Avian_orthoavulavirus_1_isolate_pigeon/China/WZ2201/2022              | 2022 | China      | Class II | VI  | VI.2.1.1.2.2 |
| 1249 | OP796698.1 | Avian_orthoavulavirus_1_isolate_pigeon/China/WZ2205/2022              | 2022 | China      | Class II | VI  | VI.2.1.1.2.2 |
| 1250 | OQ144642.1 | Avian_orthoavulavirus_1_isolate_pigeon/China/Anhui/2432/2021          | 2019 | China      | Class II | VI  | VI.2.1.1.2.1 |
| 1251 | OQ144643.1 | Avian_orthoavulavirus_1_isolate_pigeon/China/Fujian/2168/2021         | 2019 | China      | Class II | VI  | VI.2.1.1.2.1 |
| 1252 | OQ144644.1 | Avian_orthoavulavirus_1_isolate_pigeon/China/Fujian/1187/2021         | 2019 | China      | Class II | VI  | VI.2.1.1.2.2 |
| 1253 | OQ144645.1 | Avian_orthoavulavirus_1_isolate_pigeon/China/Jiangxi/2027/2021        | 2019 | China      | Class II | VI  | VI.2.1.1.2.1 |
| 1254 | OQ144646.1 | Avian_orthoavulavirus_1_isolate_pigeon/China/Yunnan/1078/2022         | 2022 | China      | Class II | VI  | VI.2.1.1.2.2 |
| 1255 | OQ144647.1 | Avian_orthoavulavirus_1_isolate_pigeon/China/Ningxia/1111/2022        | 2022 | China      | Class II | VI  | VI.2.1.1.2.2 |
| 1256 | OQ144648.1 | Avian_orthoavulavirus_1_isolate_pigeon/China/Guangxi/1228/2022        | 2022 | China      | Class II | VI  | VI.2.1.1.2.2 |
| 1257 | OQ144649.1 | Avian_orthoavulavirus_1_isolate_pigeon/China/Guangdong/2285/2022      | 2022 | China      | Class II | VI  | VI.2.1.1.2.1 |
| 1258 | OQ295860.1 | Avian_orthoavulavirus_1_isolate_dove/Pak/Bal/WECD-121/2020            | 2020 | Pakistan   | Class II | XX  | XX           |
| 1259 | OQ295861.1 | Avian_orthoavulavirus_1_isolate_dove/Pak/Bal/WECD-122/2020            | 2020 | Pakistan   | Class II | XX  | XX           |

|      |            |                                                                   |      |          |          |     |         |
|------|------------|-------------------------------------------------------------------|------|----------|----------|-----|---------|
| 1260 | OQ407702.1 | Avian_orthoavulavirus_1_isolate_Pigeon/Pak/Karachi/AW-2/2015      | 2015 | Pakistan | Class II | XXI | XXI.1.1 |
| 1261 | OQ407703.1 | Avian_orthoavulavirus_1_isolate_Pigeon/Pak/Multan/5-126/2014      | 2014 | Pakistan | Class II | XXI | XXI.1.1 |
| 1262 | OQ407704.1 | Avian_orthoavulavirus_1_isolate_Pigeon/Pak/Gujranwala/998/2015    | 2015 | Pakistan | Class II | XXI | XXI.1.1 |
| 1263 | OQ407705.1 | Avian_orthoavulavirus_1_isolate_Pigeon/Pak/Buner/KPK/1002/2015    | 2015 | Pakistan | Class II | XXI | XXI.1.1 |
| 1264 | OQ407706.1 | Avian_orthoavulavirus_1_isolate_Pigeon/Pak/Buner/KPK/1003/2015    | 2015 | Pakistan | Class II | XXI | XXI.1.1 |
| 1265 | OQ407707.1 | Avian_orthoavulavirus_1_isolate_Pigeon/Pak/Peshawar/KPK/8/2016    | 2016 | Pakistan | Class II | XXI | XXI.1.1 |
| 1266 | OQ407708.1 | Avian_orthoavulavirus_1_isolate_Pigeon/Pak/Lahore/AW-71/2020      | 2020 | Pakistan | Class II | XX  | XX      |
| 1267 | OQ407709.1 | Avian_orthoavulavirus_1_isolate_Pigeon/Pak/Lahore/AW-72/2020      | 2020 | Pakistan | Class II | XXI | XXI.1.2 |
| 1268 | OQ407710.1 | Avian_orthoavulavirus_1_isolate_Pigeon/Pak/Lahore/AW-73/2020      | 2020 | Pakistan | Class II | XXI | XXI.1.2 |
| 1269 | OQ407711.1 | Avian_orthoavulavirus_1_isolate_Pigeon/Pak/Lahore/139/2015        | 2015 | Pakistan | Class II | XX  | XX      |
| 1270 | OQ407712.1 | Avian_orthoavulavirus_1_isolate_Pigeon/Pak/Lahore/123/2015        | 2015 | Pakistan | Class II | XX  | XX      |
| 1271 | OQ407713.1 | Avian_orthoavulavirus_1_isolate_Pigeon/Pak/Lahore/147/2015        | 2015 | Pakistan | Class II | XX  | XX      |
| 1272 | OQ407714.1 | Avian_orthoavulavirus_1_isolate_Pigeon/Pak/Pathoki/129/2017       | 2017 | Pakistan | Class II | XX  | XX      |
| 1273 | OQ407715.1 | Avian_orthoavulavirus_1_isolate_Pigeon/Pak/R-Pindi/SFR-17/2016    | 2016 | Pakistan | Class II | XX  | XX      |
| 1274 | OQ407716.1 | Avian_orthoavulavirus_1_isolate_Pigeon/Pak/Mirpur/AW-p55/2017     | 2017 | Pakistan | Class II | XX  | XX      |
| 1275 | OQ407717.1 | Avian_orthoavulavirus_1_isolate_Pigeon/Pak/Mirpur/AW-p56/2017     | 2017 | Pakistan | Class II | XX  | XX      |
| 1276 | OQ407718.1 | Avian_orthoavulavirus_1_isolate_Pigeon/Pak/Bhimber/AW-p57/2018    | 2018 | Pakistan | Class II | XX  | XX      |
| 1277 | OQ407719.1 | Avian_orthoavulavirus_1_isolate_Pigeon/Pak/Bhimber/AW-p58/2018    | 2018 | Pakistan | Class II | XX  | XX      |
| 1278 | OQ407720.1 | Avian_orthoavulavirus_1_isolate_Pigeon/Pak/Kotli/AW-p60/2018      | 2018 | Pakistan | Class II | XX  | XX      |
| 1279 | OQ407721.1 | Avian_orthoavulavirus_1_isolate_Pigeon/Pak/Kotli/AW-p62/2018      | 2018 | Pakistan | Class II | XX  | XX      |
| 1280 | OQ407722.1 | Avian_orthoavulavirus_1_isolate_Pigeon/Pak/Kotli/AW-p63/2018      | 2018 | Pakistan | Class II | XX  | XX      |
| 1281 | OQ407723.1 | Avian_orthoavulavirus_1_isolate_Pigeon/Pak/Pigeon/AW-b01/2019     | 2019 | Pakistan | Class II | XX  | XX      |
| 1282 | OQ407724.1 | Avian_orthoavulavirus_1_isolate_Pigeon/Pak/Pigeon/AW-b02/2020     | 2020 | Pakistan | Class II | XX  | XX      |
| 1283 | OQ407725.1 | Avian_orthoavulavirus_1_isolate_Pigeon/Pak/Badhana/1081/2015      | 2015 | Pakistan | Class II | XX  | XX      |
| 1284 | OQ407726.1 | Avian_orthoavulavirus_1_isolate_Pigeon/Pak/Chak_Shahzad/1001/2015 | 2015 | Pakistan | Class II | XX  | XX      |
| 1285 | OQ407727.1 | Avian_orthoavulavirus_1_isolate_Pigeon/Pakistan/Jhang/117/2017    | 2017 | Pakistan | Class II | VII | VII.2   |

|      |            |                                                                     |      |          |          |     |              |
|------|------------|---------------------------------------------------------------------|------|----------|----------|-----|--------------|
| 1286 | OQ407728.1 | Avian_orthoavulavirus_1_isolate_pigeon/Pakistan/Bhimber/AW-p59/2018 | 2018 | Pakistan | Class II | VII | VII.2        |
| 1287 | OQ407729.1 | Avian_orthoavulavirus_1_isolate_pigeon/Pakistan/Badhana/998/2015    | 2015 | Pakistan | Class II | VII | VII.2        |
| 1288 | OQ435203.1 | Avian_orthoavulavirus_1_isolate_Pi-Rus-Kostroma-3606-2017           | 2017 | Russia   | Class II | XXI | XXI.1.1      |
| 1289 | OQ435204.1 | Avian_orthoavulavirus_1_isolate_Pi-Rus-Vladimir-1141-2018           | 2018 | Russia   | Class II | XXI | XXI.1.1      |
| 1290 | OQ435205.1 | Avian_orthoavulavirus_1_isolate_Pi-Rus-Vladimir-1142-2018           | 2018 | Russia   | Class II | XXI | XXI.1.1      |
| 1291 | OQ435206.1 | Avian_orthoavulavirus_1_isolate_Pi-Rus-Tatarstan-311-1-2020         | 2020 | Russia   | Class II | XXI | XXI.1.1      |
| 1292 | OQ435207.1 | Avian_orthoavulavirus_1_isolate_Pi-Rus-Tatarstan-311-2-2020         | 2020 | Russia   | Class II | XXI | XXI.1.1      |
| 1293 | OQ641418.1 | Avian_orthoavulavirus_1_isolate_PI/CH/LAH/323/2022                  | 2022 | China    | Class I  | 1   | 1.1.2        |
| 1294 | OR085370.1 | Avian_orthoavulavirus_1_strain_Pigeon/China/GX01/2019               | 2019 | China    | Class II | VI  | VI.2.1.1.2.2 |
| 1295 | OR085371.1 | Avian_orthoavulavirus_1_strain_Pigeon/China/GX03/2019               | 2019 | China    | Class II | I   | I.2          |
| 1296 | OR085375.1 | Avian_orthoavulavirus_1_strain_Pigeon/China/GX09/2019               | 2019 | China    | Class II | I   | I.2          |
| 1297 | OR099824.1 | Avian_orthoavulavirus_1_strain_Turtle_dove/China/GX01/2018          | 2018 | China    | Class II | I   | I.2          |
| 1298 | OR099825.1 | Avian_orthoavulavirus_1_strain_Pigeon/China/GX02/2019               | 2019 | China    | Class II | I   | I.2          |
| 1299 | OR099828.1 | Avian_orthoavulavirus_1_strain_Pigeon/China/GX03/2018               | 2018 | China    | Class I  | 1   | 1.1.2        |
| 1300 | OR233946.1 | Avian_orthoavulavirus_1_isolate_186                                 | 2023 | Israel   | Class II | VI  | VI.2.1.1.2.2 |
| 1301 | OR233951.1 | Avian_orthoavulavirus_1_isolate_12                                  | 2023 | Israel   | Class II | VII | VII.1.1      |
| 1302 | OR233953.1 | Avian_orthoavulavirus_1_isolate_78                                  | 2023 | Israel   | Class II | VI  | VI.2.1.2     |
| 1303 | OR253509.1 | Avian_orthoavulavirus_1_isolate_APMV-1/pigeon/Heilongjiang/BS1/2018 | 2018 | China    | Class II | VI  | VI.2.1.1.2.2 |
| 1304 | OR253510.1 | Avian_orthoavulavirus_1_isolate_APMV-1/pigeon/Heilongjiang/BS2/2018 | 2018 | China    | Class II | VI  | VI.2.1.1.2.2 |
| 1305 | OR260259.1 | Avian_orthoavulavirus_1_isolate_74                                  | 2019 | Israel   | Class II | VI  | VI.2.1.2     |
| 1306 | OR364786.1 | Avian_orthoavulavirus_1_isolate_88-2020                             | 2020 | Israel   | Class II | XXI | XXI.2        |
| 1307 | OR364787.1 | Avian_orthoavulavirus_1_isolate_89-2020                             | 2020 | Israel   | Class II | XXI | XXI.2        |
| 1308 | OR364790.1 | Avian_orthoavulavirus_1_isolate_205-2020                            | 2020 | Israel   | Class II | VI  | VI.2.1.2     |
| 1309 | OR364799.1 | Avian_orthoavulavirus_1_isolate_633-2020                            | 2020 | Israel   | Class II | VI  | VI.2.1.2     |
| 1310 | OR364816.1 | Avian_orthoavulavirus_1_isolate_363-Safsufa                         | 2014 | Israel   | Class II | XXI | XXI.1.1      |
| 1311 | OR364818.1 | Avian_orthoavulavirus_1_isolate_375-2014                            | 2014 | Israel   | Class II | VI  | VI.2.1.2     |

|      |            |                                                                         |      |              |          |    |              |
|------|------------|-------------------------------------------------------------------------|------|--------------|----------|----|--------------|
| 1312 | OR367435.1 | UNVERIFIED:_Avian_orthoavulavirus_1_isolate_AoAV-1/UVAS-Pak/Pigeon/2011 | 2011 | Pakistan     | Class II | XX | XX           |
| 1313 | OR367442.1 | UNVERIFIED:_Avian_orthoavulavirus_1_isolate_AoAV-1/UVAS-Pak/Pigeon/2016 | 2016 | Pakistan     | Class II | XX | XX           |
| 1314 | OR542540.1 | Pigeon_paramyxovirus_1_strain_Pigeon/Hubei/187/2022                     | 2022 | China        | Class II | VI | VI.2.1.1.2.2 |
| 1315 | OR542541.1 | Pigeon_paramyxovirus_1_strain_Pigeon/Hubei/188/2022                     | 2022 | China        | Class II | VI | VI.2.1.1.2.2 |
| 1316 | OR542542.1 | Pigeon_paramyxovirus_1_strain_Pigeon/Hubei/190/2022                     | 2022 | China        | Class II | VI | VI.2.1.1.2.2 |
| 1317 | OR542543.1 | Pigeon_paramyxovirus_1_strain_Pigeon/Zhejiang/1-3/2022                  | 2022 | China        | Class II | VI | VI.2.1.1.2.2 |
| 1318 | OR542544.1 | Pigeon_paramyxovirus_1_strain_Pigeon/Zhejiang/3-2/2022                  | 2022 | China        | Class II | VI | VI.2.1.1.2.2 |
| 1319 | OR542545.1 | Pigeon_paramyxovirus_1_strain_Pigeon/Zhejiang/5-2/2022                  | 2022 | China        | Class II | VI | VI.2.1.1.2.2 |
| 1320 | OR677829.1 | Avian_orthoavulavirus_1_isolate_SA/Pigeon/F1/2022                       | 2022 | Saudi Arabia | Class II | I  | I.1.1        |
| 1321 | OR677830.1 | Avian_orthoavulavirus_1_isolate_SA/Pigeon/F3/2021                       | 2021 | Saudi Arabia | Class II | I  | I.1.1        |
| 1322 | OR677831.1 | Avian_orthoavulavirus_1_isolate_SA/Pigeon/F4/2022                       | 2022 | Saudi Arabia | Class II | I  | I.1.1        |
| 1323 | OR677832.1 | Avian_orthoavulavirus_1_isolate_SA/Pigeon/F2/2021                       | 2021 | Saudi Arabia | Class II | VI | VI.2.1.2     |
| 1324 | OR677833.1 | Avian_orthoavulavirus_1_isolate_SA/Pigeon/I2/2021                       | 2021 | Saudi Arabia | Class II | VI | VI.2.1.2     |
| 1325 | OR677834.1 | Avian_orthoavulavirus_1_isolate_SA/Pigeon/I3/2021                       | 2021 | Saudi Arabia | Class II | VI | VI.2.1.2     |
| 1326 | OR860421   | Pigeon/China/HB2306/2023                                                | 2023 | China        | Class II | VI | VI.2.1.1.2.2 |
| 1327 | OR860422   | Pigeon/China/HB2307/2023                                                | 2023 | China        | Class II | VI | VI.2.1.1.2.2 |
| 1328 | OR860423   | Pigeon/China/HB2308/2023                                                | 2023 | China        | Class II | VI | VI.2.1.1.2.2 |
| 1329 | OR860424   | Pigeon/China/HB2309/2023                                                | 2023 | China        | Class II | VI | VI.2.1.1.2.2 |
