# Supplementary material for: 20世紀の東北アジアにおける人口移動と「華」( 移住先社会と中国のあいだで-近現代史における「華」を問う)
Source: MDPI journal article supplement (doi:10.3390/microorganisms12040738), 2011-02-25
Supplement: s1 [file s1]

**Table S2.** Basic information and genotypes of 43 NDV reference strains.

| Accession no. | Strains     | Host                   | Origin             | Year | Class | Sub/Genotype |
|---------------|-------------|------------------------|--------------------|------|-------|--------------|
| FJ794269      | NDV08-004   | Duck                   | China              | 2008 | I     | I.1.1        |
| KT223818      | Qianghai01  | Pigeon                 | China              | 2014 | I     | I.1.2        |
| HQ008337      | JS10        | Duck                   | China              | 2010 | I     | I.2          |
| JX524203      | V4          | Chicken                | Australia          | 1966 | II    | I.1.1        |
| GQ918280      |             | Black headed gull      | Sweden             | 1994 | II    | I.1.2.1      |
| KC503476      | 136         | Northern pintail       | USA                | 2009 | II    | I.1.2.2      |
| JX193077      | 16          | Duck                   | China              | 2008 | II    | I.2          |
| AF077761      | Lasota      | Chicken                | USA                | 1946 | II    | II           |
| EF201805      | Muktewar    | Avian                  |                    | 1940 | II    | III          |
| AY741404      | Herts       | Fowl                   | UK                 | 1933 | II    | IV           |
| AY582987      | CA          | Gamefowl               | USA                | 2002 | II    | V.1          |
| JX974435      |             | Chicken                | Mexico             | 2010 | II    | V.2          |
| FJ410145      | NY          | Pigeon                 | USA                | 1984 | II    | VI.1         |
| MG018211      | 1185        | Eurasian collared dove | USA                | 2015 | II    | VI.2.1.1.1   |
| FJ766527      | JS16        | Pigeon                 | China              | 2007 | II    | VI.2.1.1.2.1 |
| MG840654      | Ningxia2068 | Pigeon                 | China              | 2016 | II    | VI.2.1.1.2.2 |
| JX518532      | B2Isiolo    | Dove                   | Kenya              | 2012 | II    | VI.2.1.2     |
| FJ410148      | Texas       | Pigeon                 | USA                | 1998 | II    | VI.2.2.1     |
| KJ808820      | SD          | Pigeon                 | China              | 2012 | II    | VI.2.2.2     |
| DQ659677      | NA1         | Goose                  | China              | 1999 | II    | VII.1.1      |
| GQ338309      | 18          | Pigeon                 | China              | 2003 | II    | VII.1.2      |
| KT760569      | Yunan1200   | Goose                  | China              | 2013 | II    | VII.2        |
| FJ751918      | QH1         | Chicken                | China              | 1979 | II    | VIII         |
| FJ436302      | F48E8       | Chicken                | China              | 1948 | II    | IX           |
| JN872171      | 17531-3     | Turkey                 | USA                | 2010 | II    | X            |
| HQ266603      | MG1992      | Chicken                | Madagascar         | 2008 | II    | XI           |
| JN800306      | 1918_03     | Chicken                | Peru               | 2008 | II    | XII.1        |
| KC551967      | Guangdong   | Goose                  | China              | 2010 | II    | XII.2        |
| MF409241      | Chiwoko     | Chicken                | Zambia             | 2015 | II    | XIII.1.1     |
| JQ267579      | EMM7        | Chicken                | Iran               | 2011 | II    | XIII.1.2     |
| MH019281      | PK1         | Chicken                | Pakistan           | 2015 | II    | XIII.2.1     |
| MF422129      | 41016A      | Chicken                | India              | 2016 | II    | XIII.2.2     |
| JF966386      | ML029       | Chicken                | Mali               | 2007 | II    | XIV.1        |
| KT948996      | NG695       | Duck                   | Nigeria            | 2009 | II    | XIV.2        |
| JX119193      | 49931       | Chicken                | Dominican Republic | 2008 | II    | XVI          |
| KY171991      | 861         | Quail                  | Nigeria            | 2004 | II    | XVII         |
| JF966387      | ML008       | Chicken                | Mali               | 2009 | II    | XVIII.1      |

---

|          |                  |         |          |      |    |         |
|----------|------------------|---------|----------|------|----|---------|
| MH392227 | 914              | Chicken | Nigeria  | 2009 | II | XVIII.2 |
| JN941993 | W241508          | Pelican | USA      | 2008 | II | XIX     |
| AB853928 | SM87             | Chicken | Japan    | 1987 | II | XX      |
| KT962979 | 777              | Pigeon  | Russia   | 2010 | II | XXI.1.1 |
| KX236100 | 21A              | Pigeon  | Pakistan | 2015 | II | XXI.1.2 |
| MH044693 | Konarak<br>Barin | Pigeon  | Iran     | 2017 | II | XXI.2   |

---
