# Supplementary material for: 20世紀の東北アジアにおける人口移動と「華」( 移住先社会と中国のあいだで-近現代史における「華」を問う)
Source: MDPI journal article supplement (doi:10.3390/microorganisms12040738), 2011-02-25
Supplement: s1 [file s1]

**Table S1** Primers for sequencing the viral whole genome of the NDV in pigeons.

| Primer | Location (nt)   | Sequence (5'→3')          | Size (bp) |
|--------|-----------------|---------------------------|-----------|
| A-1    | 1 – 1,530       | ACCAAACAGAGAATCYGTGAG     | 1,530     |
| A-2    |                 | TGAATGGTGCTCTGTGCAG       |           |
| B-1    | 1,304 – 2,790   | GCTGCCCAACGAGTATCTGAGG    | 1,487     |
| B-2    |                 | GAGCRACTGCYCGTAGATCAC     |           |
| C-1    | 2,552 – 4,056   | TGTCGACTTTGTGCAGGC        | 1,505     |
| C-2    |                 | AATGTCACTTTCTTTCC         |           |
| D-1    | 3,905 – 5,516   | CCTCGCGCTCAATGTCACTA      | 1,612     |
| D-2    |                 | CTACCTTCCGGGACAAGTG       |           |
| E-1    | 5,444 – 7,087   | CGTGCCACCTACCTGGAGAC      | 1,644     |
| E-2    |                 | GAGTAGAAAAGAATACCCTCCCTGT |           |
| F-1    | 6,930 – 8,565   | TTGCACTCGGATAACCCTCA      | 1,636     |
| F-2    |                 | TCAAGTATTTTCTTCCATT       |           |
| G-1    | 8,432 – 10,047  | CCAGAGTCACATCTATCYTCYCCAT | 1,616     |
| G-2    |                 | AAAATCCGCCCATTAAACRTT     |           |
| H-1    | 9,825 – 11,484  | GGCTCGCCTCATTTAGGC        | 1,660     |
| H-2    |                 | ACCGCTTCTTGATTGAGTAGGA    |           |
| I-1    | 11,237 – 12,944 | CTGAGTCCTAGCATTATGACTA    | 1,708     |
| I-2    |                 | AGTGAATRATGGGGTGAGAGAT    |           |
| J-1    | 12,839 – 14,455 | AGAGGTCTCAACAACATCGTCTTAT | 1,617     |
| J-2    |                 | TCTCAAAWACTTCATTAGTCTCGGT |           |
| K-1    | 13,956 – 15,192 | TGACCTCRGATAAGGCAGTGAG    | 1,237     |
| K-2    |                 | ACCAAACAAAGATTTGGTGAA     |           |
