# Supplementary material for: Genetic Characterization, Pathogenicity, and Epidemiology Analysis of Three Sub-Genotype Pigeon Newcastle Disease Virus Strains in China
Source: Microorganisms. 2024 Apr 4;12(4):738. doi: 10.3390/microorganisms12040738 (PMC11051795; doi:10.3390/microorganisms12040738)
Supplement: Supplementary file 1 [file microorganisms-12-00738-s001.zip]

Archive with 4 entries (4 files):
- Supplement Fig1 Clinical symptoms and gross lesions.pdf
- Supplement Table S1 Primers.pdf
- Supplement Table S2 ref strains.pdf
- Supplement Table S3 GenBank database 1329.pdf
